# Supplementary material for: Potential Targets for Epilepsy Treatment: An Integrated Study Based on Multi-omics, Mendelian Randomization, Immune Infiltration Assessment, and Machine Learning
Source: Research Square preprint supplement (doi:10.21203/rs.3.rs-5656048/v1), 2024-12-19
Supplement: Supplementary file 1 [file 4648b6395b6bdd7383a69336.xlsx]

## Sheet: S1
id	logFC	AveExpr	t	P.Value	adj.P.Val	B
TNFSF14	0.6482925744035	6.76303707962963	7.09358967945201	3.67317601717803e-11	2.72880246316156e-07	14.9624999427322
HLA-C	0.80375006959909	7.41272778271605	6.10197037775922	7.23951214292821e-09	5.97581507886818e-06	9.9719568553979
HES4	0.696791886641779	6.20273705925926	5.62953042872747	7.62556955434957e-08	1.53109070862873e-05	7.75586
RNASE2	0.649628452621325	8.47062794197531	4.20450967331295	4.28262938385898e-05	0.00113281079936076	1.84966272179738
DEFA4	0.61154473257588	4.57472760123457	2.74119212677763	0.00679780754754522	0.0345187370271452	-2.73592
GYG1	0.596535392079202	8.47376204074074	3.01577978300097	0.00296959979876058	0.0201655913208339	-2.00461
CEACAM6	0.593229850251581	4.19805939135802	3.48064543365702	0.000640322442428059	0.00721214906972257	-0.626441
CYBA	0.591566589644538	8.47201933827161	5.81061834840471	3.13488158641422e-08	8.93514188973303e-06	8.59171393588962
ORAI2	0.555734152183087	4.03310388641975	5.79825109522341	3.3329159135688e-08	8.93514188973303e-06	8.53408060358612
ARG1	0.545762670978739	6.9710152462963	3.65870843314015	0.000340859708608272	0.00466343789180635	-0.0535665
SLPI	0.542974146826817	7.81509426296296	2.78686426783092	0.00594732363506706	0.0318751751392691	-2.61865
SPINT2	0.541711323843533	6.9930608654321	2.98485410454438	0.00326949638216492	0.0214567920698791	-2.0901
HIST2H2BF	0.537990905859441	4.45891782098765	5.09936554195901	9.2784101249241e-07	8.30473600217604e-05	5.41295959051752
ARF1	0.52283569857166	7.6807	5.40852538881667	2.20300722722943e-07	3.20904719433087e-05	6.75978851278939
MLKL	0.520868945333551	6.69705319876543	4.2589846388953	3.4424090880228e-05	0.00098441873770263	2.05135636170942
RSAD2	0.514528791056648	9.17548276358025	2.84950319474346	0.00493802096218621	0.028172120493191	-2.45497
RNF19B	0.51215767964616	5.75791819938272	5.27554686412627	4.11664805128036e-07	4.88312059315834e-05	6.17366731143713
MAPK14	0.511588494270409	4.84960140246914	2.74820084379879	0.00666050895894357	0.0340308948115487	-2.71803
METRNL	0.490762528664181	5.01422267345679	5.51195074308052	1.34539423196288e-07	2.17281168462005e-05	7.22256688072939
TCN1	0.483018334523616	6.51819224074074	3.86473718639137	0.00015968283132777	0.00288085718967965	0.639243597974633
MPO	0.475882910225615	4.6559274808642	3.49247365453699	0.000614502932400632	0.00705586133663724	-0.589143
GPR97	0.4689777543256	4.01971554567901	4.20438108760151	4.28482749522644e-05	0.00113281079936076	1.84918908424457
EPSTI1	0.464458456662882	11.188747712963	4.02754976272255	8.58493591055027e-05	0.00186483885612509	1.20889789112921
MAEA	0.464005090472323	5.3202187308642	4.0988910584211	6.50283070223119e-05	0.00152823078427133	1.46454525792914
SSFA2	0.463980997062168	4.58998680802469	2.80917065522865	0.00556816686848354	0.0305734749933217	-2.56074
IFITM3	0.463091692906998	12.0796051358025	3.38638367490184	0.000885588716787027	0.00901255966559891	-0.919777
C19orf59	0.462412499269601	7.94185685185185	3.90748624476735	0.000135917832934091	0.00259571614618859	0.786943410293414
ECGF1	0.46018351949359	7.05894534320988	6.52740181553973	7.9110881944136e-10	1.17542948392597e-06	12.060755639434
BPI	0.459064355380619	4.38587137962963	3.32718413089813	0.00108194516501418	0.0102784790676347	-1.10044
ATP5E	0.455130146745658	6.47796606234568	3.18112518546928	0.001753374377638	0.0142048181586398	-1.53426
MMP9	0.454977898311958	8.63891140432099	3.35442011335709	0.000987036791222021	0.00968436072634601	-1.01766
SERPING1	0.454193065768546	8.26426091481481	3.19545	0.00167351110761221	0.0136621033169792	-1.49248
P2RY14	0.453389153887353	7.15674771049383	2.90631530124605	0.00416048717833028	0.0253138896378507	-2.30367
H1F0	0.450322588962834	5.6062030037037	5.05501767320314	1.13517529480499e-06	9.92143207659564e-05	5.2243854209601
LSP1	0.448257905956826	5.36218128765432	5.60740041188466	8.49044057376603e-08	1.53842641518312e-05	7.65490838542094
LRSAM1	0.443555193442622	5.8443501037037	6.56252667477435	6.56516724977322e-10	1.17542948392597e-06	12.2368800391068
OTUD1	0.438236126748905	6.69124114135802	3.94871669529397	0.000116211515719193	0.00231457198465921	0.930664139653688
PGLYRP1	0.432472212400583	6.63638401604938	4.08936946390651	6.74980917899826e-05	0.00156234317366449	1.43021486081842
FCAR	0.428332918081479	6.17425070555556	3.99321276703207	9.80057113132715e-05	0.00205673567611947	1.08715609408271
CD1A	0.423928944895309	4.7595592808642	4.7674241611789	4.07872292187899e-06	0.000219112206805277	4.03080738751679
HIP1	0.422114658513227	5.17081336481481	2.84928730746279	0.0049412132188219	0.028172120493191	-2.45554
GADD45B	0.421774533906836	8.63957398395062	4.60354182066838	8.26139935156013e-06	0.000346745399902487	3.37407191087926
COPE	0.414077872147379	6.84079684135803	4.53801302628754	1.09026895102481e-05	0.000417505568925943	3.11637762723434
TMEM176A	0.404805305129036	6.56286399320988	2.83630871581595	0.00513661918588967	0.0289529164885997	-2.48972
TMEM140	0.404423735870804	9.72018465864197	4.68168239015278	5.91317510853785e-06	0.000274556111758298	3.68504206142012
IL8RB	0.402127432575877	9.23455596358025	3.36094742851166	0.000965476647221122	0.00954456169262079	-0.99774
FLOT2	0.400383764031817	10.4074509271605	3.6012043236647	0.000418899155374227	0.00541217708743502	-0.241228
KLHDC8B	0.396751369712713	6.99400064691358	4.76624766124975	4.09968996445464e-06	0.000219112206805277	4.02603111350809
LY6E	0.396464379289078	9.65150167160494	3.11731691556311	0.0021540690413417	0.0161316319638382	-1.71841
KCNJ2	0.395683789774385	9.3239256962963	3.88429135715588	0.000148360104917348	0.00275541804857745	0.706637505375657
IFIT3	0.395015312270738	9.59611843765432	2.89994320881836	0.00424174364893449	0.0255986300308159	-2.32078
GADD45A	0.394223740090894	6.66406904135803	4.63718971733792	7.15686690805716e-06	0.00031173507337117	3.50749000047083
VPS18	0.391842323340367	4.13239459320988	5.73667227588787	4.51617326976298e-08	1.01668640063846e-05	8.24830265993441
IL17RA	0.391164481983443	6.95687092283951	3.77431405205351	0.000223574749384435	0.00360134937785462	0.331273889129722
LILRA5	0.38425562994644	6.48014556851852	4.03181228783525	8.44447071804238e-05	0.00184730412155676	1.22406994183719
TRIM21	0.382314428534327	7.72708314938272	5.10496379279619	9.0444187050402e-07	8.19729937686476e-05	5.43684831593489
DACH1	0.381712287469571	6.4354270191358	4.33880958092508	2.49061495446639e-05	0.00076457762383185	2.35062468928876
PLSCR1	0.381132251192987	7.48254114567901	3.98908696548661	9.95721800624588e-05	0.00206626180358661	1.0725853547486
FAM46A	0.380106985862684	8.88470278950617	5.61107674592713	8.34040522291541e-08	1.53842641518312e-05	7.67165982252731
CAMKK2	0.377362533095275	6.30205739753086	3.88291785651409	0.000149129838235465	0.00276280690336975	0.701894520971092
BSG	0.376767762197695	6.78134704259259	4.92034670102069	2.07923008823649e-06	0.000140423639322808	4.65907661618585
TSPAN2	0.376286784888814	4.7609449117284	4.27105704400121	3.27887460406388e-05	0.000944137962542269	2.0963339574945
SERPINA1	0.375348450348969	9.42473986790123	4.98707771042868	1.54261387760816e-06	0.000118076965433566	4.9378
PRKCD	0.375189819672135	9.93789382098765	2.64268882204757	0.00901839483542403	0.0420839542916866	-2.98281
ISG15	0.375081977617272	11.7187728648148	2.81095990310858	0.00553872841306167	0.030456856684408	-2.55607
CAMP	0.373504831293615	8.06283566419753	2.92011066894654	0.00398943032476748	0.0246158454175229	-2.26653
FAM43A	0.372152879565005	6.14266199382716	4.40792950557103	1.87545374358804e-05	0.00061108534478577	2.61328975135788
TSPO	0.37164358756695	8.3864477345679	5.66518002012642	6.41017575482636e-08	1.36060559093157e-05	7.91902820461367
TRIM22	0.36947800572959	8.80649548950617	3.24301662044829	0.00143181286760643	0.012304836565711	-1.35251
EMR1	0.368660774500891	6.00987	3.51092178119704	0.000576176329758368	0.00677860298471718	-0.530755
ZDHHC19	0.368647949488719	5.80382821481482	3.28252647628476	0.00125619309961565	0.0112844722334276	-1.23489
CTSD	0.367182478883295	5.12412636049383	6.11117267309073	6.9072620542892e-09	5.97581507886818e-06	10.0162384636502
OXER1	0.366620905177734	4.94175522716049	3.77484279425522	0.000223138984895528	0.00360134937785462	0.333057058013619
HSH2D	0.363277707060543	7.22538377283951	4.93811640482335	1.92085403143593e-06	0.000135427250535211	4.73303033117373
ENTPD1	0.362328910728779	7.38366189506173	4.81899441390298	3.25496321928776e-06	0.000188915013719444	4.24103332956049
BBS10	0.360567547833148	4.44611248271605	2.66504242642549	0.00846375822033488	0.0401771628235577	-2.92751
STK40	0.35993565177731	7.04430767037037	5.28614660191156	3.91796607849359e-07	4.87217843594509e-05	6.22001458632595
RNF145	0.359921646469726	7.4173431845679	4.15580580649148	5.19718346482764e-05	0.00131326108708179	1.67109541362981
GBP1	0.35956050475572	9.75436820864198	3.12517940325248	0.00210048054141604	0.0159066971887664	-1.69589
AKAP8L	0.358850197273167	4.02573437901235	3.83984897356658	0.000175283728184799	0.00310783488468943	0.553873356181278
CD97	0.358079068268141	9.1850852691358	5.17189994094686	6.65464597002419e-07	6.57902042315545e-05	5.72392580254371
CD37	0.357668148807012	7.04757898024691	6.71786078269584	2.85938509027799e-10	7.08079061189174e-07	13.0221355226641
ABCG1	0.357031422950818	6.76217604197531	4.29491558407526	2.97731826501646e-05	0.00087771815042886	2.18551942932286
GRN	0.356487149423792	7.73921307160494	3.61779184860719	0.000394812009299448	0.00521896515495658	-0.187354
ZDHHC12	0.356400957263428	5.29589207222222	6.32916461179977	2.24288985073394e-09	2.77707145018374e-06	11.0770405507922
LRRC25	0.356225274484658	7.51951200061728	5.01131231529413	1.38319763053925e-06	0.000111693208666045	5.03970730595878
PTK2B	0.356053832121409	5.76032019567901	4.73510787596138	4.69411273554266e-06	0.000237228323213241	3.89993337132088
CHIC2	0.355391062262617	8.7440700037037	3.74536754199471	0.000248700006365712	0.0038135317574352	0.233971343634432
TNFRSF1A	0.354421468787534	8.12313419259259	5.58446234002844	9.48791054838743e-08	1.67823065390405e-05	7.55055535271194
GATAD2B	0.351337249618567	4.27120456111111	3.74489427607261	0.000249132188020902	0.0038135317574352	0.232385688446473
MGRN1	0.349946769274473	5.4415429845679	5.21079323219232	5.56125342023882e-07	5.90766646307779e-05	5.89195216321778
ZBP1	0.349441020386301	8.8004910654321	4.43487169780544	1.67769048592769e-05	0.000569112448399853	2.71655288038628
NBN	0.348599904236327	7.5182864691358	3.34300525640753	0.00102582555487226	0.00991008848783621	-1.05243
BCOR	0.348435987323488	5.2116280117284	3.90644608080476	0.000136453883209195	0.00259927153425926	0.783333682426743
IFI6	0.348093382957313	10.0061301012346	3.04281240903074	0.00272842313835488	0.0190502401267278	-1.92924
C3AR1	0.347402003798088	6.70995861358025	3.83094901830453	0.000181205693070785	0.00317494597599732	0.523456284002076
FGR	0.346841037883458	10.7205080395062	4.98615658067059	1.54901203457234e-06	0.000118076965433566	4.93393876041745
CECR6	0.34665967904561	5.76485080617284	3.89410793475204	0.000142967616914776	0.00268208693449462	0.740576532775226
TMEM55B	0.345792868235677	5.49267664938272	3.74664420993545	0.000247537702259856	0.0038135317574352	0.238249596415589
GPR141	0.343660861175136	4.6782416154321	3.44486290601489	0.000724767334684159	0.00790645599026229	-0.73861
NR1H2	0.34355403815939	4.26215022901235	4.70250029897432	5.40559575999751e-06	0.000259866662065687	3.7685584186051
ZFAND3	0.342420193442623	5.13941280123457	4.19227649191559	4.49665659748503e-05	0.00116803013506001	1.80465442759203
OSCAR	0.339618776221391	6.92839777962963	4.03150628562189	8.45448110552292e-05	0.00184730412155676	1.22298032089569
RHOG	0.336737081123193	9.51011460987654	3.37970525188016	0.000905942908218661	0.00909493225021139	-0.940295
GBGT1	0.335963965005683	6.86025311358025	4.94842531440095	1.83440197104572e-06	0.000133755612654458	4.77602333076564
KCTD2	0.33362514531732	5.75888392777778	4.07010568602196	7.27715165553106e-05	0.00165327093727646	1.3609564346065
CDC42EP2	0.333569378023049	6.70006886419753	3.33367364487196	0.00105858798271123	0.010121300030324	-1.08077
FBXL20	0.333547183265703	6.23668937098765	3.27232870352904	0.00129949235541905	0.0115147423656333	-1.26536
PEX11G	0.333129243142348	4.06038952469136	3.50106371728364	0.000596368200519715	0.00691718018777502	-0.561989
HK3	0.333106787372183	6.37568447530864	3.10653770310533	0.00222959430073393	0.0164976653985581	-1.74919
SIGLEC5	0.332777808651194	7.88512294506173	3.04156676999945	0.00273912709812996	0.0191033679304663	-1.93272
PAK1	0.330117538613855	8.62083302098765	4.93344754355258	1.96129520392809e-06	0.000135427250535211	4.71358059350332
STARD10	0.329573180701185	5.75001506358025	4.00682819898428	9.30011575243766e-05	0.0019796722041507	1.13532783832837
ALPL	0.329551785943845	11.1691020691358	3.61393933069021	0.000400287027769495	0.00527257505194961	-0.199885
MOSC1	0.329417516555758	8.22250909567901	4.01468731724048	9.0224285627062e-05	0.00192608108598691	1.16319451056822
PDK4	0.329156620337605	5.05844106111111	3.03824761219359	0.00276783840416464	0.0192001730698758	-1.94201
HMGCL	0.328128297419248	5.56157927407407	2.96087451473918	0.00352093145886234	0.0225685934494291	-2.15585
FUT7	0.328115835140397	5.3355356191358	3.60908981097364	0.000407280723114514	0.0053082254245925	-0.215643
VNN1	0.327722721246555	5.23719082469136	2.6344127141432	0.00923190965889446	0.0428113962895924	-3.00318
CORO2A	0.32633264543094	5.64360633641975	4.87068899909881	2.59186152618056e-06	0.000164572130581157	4.45345226698168
OAS1	0.326020668284366	8.74333909444444	2.92516242837064	0.00392841972502758	0.0242999418295003	-2.25289
TMEM175	0.325753169810094	7.40192745185185	3.43088832786539	0.000760496887186685	0.00812845905018746	-0.782146
ECHDC3	0.325540178802143	5.54385992345679	3.7903482925499	0.000210712079804235	0.00346323017890634	0.385441631336554
IRF1	0.325419915273498	10.9148034197531	4.42133831203089	1.77438147485031e-05	0.000591832709192776	2.66462120879692
CAPZA2	0.322629143564356	9.83596933024691	3.00387454462503	0.00308191647658257	0.0206287052401338	-2.03761
IRF7	0.321462972926476	8.40727137160494	3.24601599109997	0.00141771869831107	0.0122325577349047	-1.34363
PTP4A3	0.321110151225448	4.25490066481481	4.4468347284796	1.59645543675668e-05	0.000546546886620525	2.76256155231902
SLC26A8	0.320754369388091	6.16912475185185	3.04132894570991	0.00274117515330154	0.0191033679304663	-1.93339
ARHGAP1	0.318698811345566	7.02605280679012	3.29949213226149	0.00118712406474627	0.0108952760191556	-1.18399
C6orf211	0.318178177795813	5.19124918148148	3.5301963030293	0.000538539162969196	0.00646333997043321	-0.469471
HS1BP3	0.317401735432564	5.23538118518518	5.2396934221271	4.86409164564042e-07	5.55928259007118e-05	6.0173820545973
MS4A2	0.316980302499593	4.90013980061728	2.96675141146604	0.00345771866497323	0.022336862575727	-2.13978
ALDOA	0.316188686625549	6.46905055740741	4.70180253781509	5.42190505050228e-06	0.000259866662065687	3.76575463909961
TOR1AIP1	0.314785620548612	7.61287144567901	3.39602434839098	0.000856959724755515	0.00881703119980601	-0.890095
TNFRSF10C	0.314147789806855	5.05220122839506	3.30012706043038	0.00118460926277551	0.0108952760191556	-1.18209
F5	0.313632068852454	7.02130717407407	3.73137294755919	0.000261784242530783	0.00391798906239197	0.187154053924686
ASAH1	0.313152940788836	5.30794955679012	4.29567601985639	2.96815841322838e-05	0.00087771815042886	2.18836847951293
EHBP1L1	0.312470958756698	5.85033404259259	3.7896344393942	0.000211269497151816	0.0034647264775736	0.383025979022777
PDIA6	0.312125777211495	5.52292808271605	2.96204137515743	0.00350829673272177	0.0225264791939413	-2.15266
B3GNT8	0.311767964567439	4.83233593641975	3.67838767846538	0.000317464223433622	0.00443483018568709	0.0112325688019395
HOMER3	0.309622964518745	5.18242106419753	4.92921305060157	1.99868678305072e-06	0.000136222423039301	4.69595202933353
ZNF564	0.309150721084241	5.37346846049383	3.64715716644106	0.000355340783420357	0.00479968487278152	-0.0914653
VEGFA	0.309083738484012	4.74553553580247	3.61049723924996	0.000405239238185999	0.00529090035234408	-0.211072
RALY	0.308634781139421	6.85227389259259	5.18562999791693	6.24669244193957e-07	6.43898482701287e-05	5.78314038212486
ARF3	0.308580589287449	6.80444604074074	3.70874087831369	0.000284331450386451	0.00411754063337416	0.11175238117796
C1RL	0.308368594530108	7.6911222154321	4.41879	1.79321260094225e-05	0.00059207895166222	2.65483851203523
TSC22D4	0.306839537282909	4.39346729135803	5.75409343527265	4.14504662323681e-08	9.93340366581492e-06	8.32894992491139
MS4A3	0.306505351890926	6.36826215432099	2.73984598144038	0.00682447009507963	0.0346304565138979	-2.73935
SIAH1	0.304396154422985	6.45788114444444	4.57237325892825	9.42995645431365e-06	0.000378676467562681	3.25114723849568
DUSP18	0.304083128940106	7.08461462592593	5.4825159491213	1.54904308123162e-07	2.44847681924887e-05	7.0902528779395
TBXAS1	0.303599814283394	7.37727252962963	6.2259548965182	3.8310252761894e-09	4.06581239668729e-06	10.5719965626038
SAMD9L	0.303404040642757	8.72451586666667	3.35250786205369	0.000993437773529469	0.00969809358679425	-1.02349
ZNHIT1	0.303390306979384	6.95032230432099	4.6610403511112	6.4617578143205e-06	0.000289819893292234	3.60250820160157
MX1	0.302648812205819	11.6725945061728	2.89294899246302	0.00433260356931377	0.0259734962887453	-2.33951
ZMAT3	0.302171482097068	8.39244	2.76357295070686	0.00636814438191301	0.0330369724952736	-2.67867
ABP1	0.301864389238759	5.22196622283951	2.61276775542163	0.0098120106826745	0.0443686872017171	-3.05617
ACTG1	0.301699111605256	10.8283298679012	4.66052778535675	6.47598630858943e-06	0.000289819893292234	3.60046230767407
ALDH3B1	0.301359159000162	6.90479910246914	3.84780173647953	0.000170147818679169	0.00302399077743432	0.581102792262379
OGFR	0.301245982551538	6.57691745987654	5.86198597895013	2.42860133135197e-08	8.59146632886371e-06	8.83194223812414
VAMP3	0.301206808196723	8.46698392160494	4.25877860159304	3.44526681656594e-05	0.00098441873770263	2.05058961577122
ELMO2	0.301030828209703	6.75886228765432	3.47191264311233	0.000660034711808587	0.00735142110048874	-0.653908
TRIM56	0.300597648092843	6.3567714808642	2.94844923863064	0.00365808700171698	0.0231087825984315	-2.18973
C1orf144	0.300216020743388	8.73786215925926	4.61586857431683	7.83890922319909e-06	0.000332772894966549	3.42286304054422
JHDM1D	-0.30049	6.10614748641975	-4.11194	6.17825706390024e-05	0.00147582867291688	1.51171101850405
LEF1	-0.302567	8.35987765185185	-3.35984	0.000969108001111031	0.00954841291810855	-1.00113
KLRG1	-0.302615	7.28300841419753	-3.56757	0.000472054107879758	0.00584481661239787	-0.349824
CNGB1	-0.303001	6.10925673395062	-4.29939	2.92378050645674e-05	0.000868830615298685	2.20229788749154
TBC1D4	-0.303143	4.57523222592593	-3.15408	0.00191394022967033	0.0150144265746789	-1.61272
EPHA4	-0.303286	5.6016547962963	-4.45046	1.57258875502199e-05	0.000545923451451327	2.77652630791613
TMEM181	-0.303472	8.27866613950617	-4.90754	2.20118315961144e-06	0.000146005265113869	4.60588328733495
PSMC3	-0.303651	7.4620117154321	-3.963	0.000110041295304248	0.0022335977672548	0.980753996547784
PNMA3	-0.303685	4.55310954135802	-3.21217	0.00158450032223721	0.0131374870337849	-1.44347
RBBP4	-0.306332	6.05044050925926	-3.15882	0.00188483054887155	0.0148487870069637	-1.599
SP4	-0.306342	6.8901567617284	-2.77818	0.00610112312396246	0.0322957460257818	-2.64107
C6orf204	-0.307456	4.96162177839506	-4.84251	2.93520321273282e-06	0.000175851811833807	4.33743654047099
TOPORS	-0.307525	6.48995636358025	-2.69919	0.00767571735426753	0.0375397657833137	-2.8422
CCDC45	-0.307777	6.77925892160494	-4.55526	1.0137537988449e-05	0.000396377735348354	3.18394419763679
TNFRSF17	-0.309264	5.96404978148148	-2.69174	0.00784171933794882	0.0381943268225954	-2.86089
RASGRP1	-0.311345	7.66651880185185	-4.19676	4.41703494630213e-05	0.00115542790901685	1.82114169438121
CTSZ	-0.312218	8.17596058271605	-4.94383	1.8724705500153e-06	0.000133755612654458	4.75684661638111
MALT1	-0.31228	5.6848146845679	-5.86347	2.410720139417e-08	8.59146632886371e-06	8.83889779798868
CARHSP1	-0.312535	9.90236808148148	-4.40406	1.90566308098413e-05	0.000618217075486074	2.59848570860389
MTR	-0.313768	6.34030076358025	-5.136	7.84772029178299e-07	7.28758925595698e-05	5.56961051300444
CDC14A	-0.31408	5.42825264012346	-4.75434	4.31787348853438e-06	0.000224476615482867	3.97773469397084
SGK	-0.314368	9.8122278845679	-3.4769	0.000648701206355465	0.00726878018403431	-0.638219
PEBP1	-0.315233	7.90536408580247	-3.08724	0.00237091557076303	0.0172007146242173	-1.80405
DDX27	-0.315589	6.51906824320988	-6.85111	1.3901714505173e-10	5.16379185294651e-07	13.7038007442193
RCN2	-0.315736	7.75398339320988	-3.54304	0.000514764963546877	0.00627945634513916	-0.428489
SLAMF7	-0.316267	5.27235013641975	-3.40157	0.000840874659005952	0.00870035911107969	-0.872975
CD3G	-0.316757	7.25406983765432	-3.90922	0.000135027077471098	0.00258906799561874	0.79297350366364
CDC25B	-0.316776	7.59836741604938	-4.94548	1.85874694772832e-06	0.000133755612654458	4.76371432475502
HIPK2	-0.318872	6.6162029462963	-3.7487	0.000245681094181272	0.0038103650285442	0.245125629515497
NELL2	-0.319535	6.65747853333333	-3.69365	0.000300367837369063	0.00426660165165347	0.0617051476181469
MAGEE1	-0.319776	5.69562974074074	-3.00008	0.00311849209373795	0.0208151642087864	-2.0481
U2AF1	-0.320015	8.56012852160494	-5.7019	5.35660332718665e-08	1.17041782699028e-05	8.08782439385898
FAM107B	-0.323738	9.60625928518519	-4.44798	1.588897489032e-05	0.000546546886620525	2.76696101448068
ERN1	-0.324028	6.45070515185185	-4.52703	1.14183616048099e-05	0.000432790858990474	3.07347497569497
GZMM	-0.325385	4.87455988827161	-4.21537	4.10074680440012e-05	0.00110926939554769	1.88972497381491
C12orf62	-0.325962	7.31421108888889	-4.56908	9.56229472878281e-06	0.00038192627709746	3.23820169840808
SFRS16	-0.327799	6.61766624567901	-4.91653	2.11483632958133e-06	0.000141541613445583	4.64322923690544
PTGER2	-0.330632	6.75449332654321	-3.67469	0.000321742518889182	0.00447607710267366	-0.000969378
ROCK1	-0.334964	5.51661622160494	-3.42062	0.000787788597294166	0.00833686821837373	-0.814031
EYA3	-0.335443	4.66328152469136	-4.68644	5.79316034682185e-06	0.000272388533016073	3.70412105018894
PPIG	-0.335676	7.47703244938272	-5.8273	2.88586934002893e-08	8.74095966901854e-06	8.66959166867987
UBASH3A	-0.336006	4.9139688037037	-3.2096	0.00159789562266656	0.0131897406453221	-1.45102
RORA	-0.33643	6.1865842962963	-3.79585	0.00020646120748454	0.00344539948697636	0.404077915048462
SDF2L1	-0.339723	8.84511909876543	-5.54539	1.14568810540638e-07	1.93439021251454e-05	7.37344163556642
ATM	-0.340775	8.58526044135803	-3.31043	0.00114447848260592	0.0106679180016053	-1.15105
EPC1	-0.342443	4.82796294382716	-5.04254	1.20121595563267e-06	0.000102168694751931	5.17152974098196
CD160	-0.347175	6.18090597592593	-3.72244	0.000270478366052704	0.00397897778496146	0.15733136837188
UHMK1	-0.348743	5.79877581419753	-3.78258	0.000216856612373576	0.00353295564325285	0.359161980478663
CD69	-0.349922	6.38978909567901	-5.22723	5.15359742615093e-07	5.80092049679928e-05	5.96323747860252
TAOK1	-0.352117	4.79741542962963	-3.48481	0.000631107348231411	0.00717993336908293	-0.613306
PIK3R1	-0.353257	8.3135258345679	-5.22168	5.28792439300027e-07	5.86328213665657e-05	5.93914234379753
SBK1	-0.354379	8.03623136358025	-3.75893	0.00023660866664669	0.00372408005194546	0.279496802090102
DUSP2	-0.355033	5.9730159845679	-4.42413	1.75402398536569e-05	0.000589621908926773	2.67531480627728
NMT2	-0.358774	7.38208344567901	-5.90739	1.93587564466008e-08	8.45977656716454e-06	9.0453973042319
PPHLN1	-0.361669	7.07283009382716	-3.83307	0.00017977985396224	0.00316489226323573	0.530687372244295
CD3D	-0.362831	9.68888436728395	-3.90336	0.000138057465620952	0.00261640028596442	0.772619856446445
FGFR1OP2	-0.363382	6.93589099135802	-2.74997	0.00662623280746765	0.0339023991230559	-2.71351
PAK1IP1	-0.365545	6.5154798617284	-3.66738	0.000330353288416322	0.00458727958812123	-0.0250396
ZNF683	-0.369593	7.06098193703704	-2.87781	0.00453534730449057	0.0268461977903335	-2.37991
NFX1	-0.373806	6.51370810185185	-4.12982	5.75879247619715e-05	0.00140269079690717	1.57649874585286
RECQL	-0.374349	6.51235198703704	-5.8362	2.7611046514962e-08	8.74095966901854e-06	8.71118064911608
RPP40	-0.37453	6.72680167469136	-4.81241	3.35036534777149e-06	0.000191460493604572	4.2141060298823
EIF3M	-0.375965	8.87922200555555	-4.41019	1.85806394970115e-05	0.000608104983083906	2.62192057073277
CCDC65	-0.376364	5.50349593024691	-4.58838	8.81115415121057e-06	0.00035965969334804	3.31420450009506
NR4A2	-0.378084	6.72597253888889	-3.86841	0.000157497420904552	0.00288085718967965	0.65186865230241
FAM116A	-0.381288	6.85349923333333	-3.09693	0.00229897606273496	0.0168266927783823	-1.77655
BCL11B	-0.382824	7.51054287222222	-4.16545	5.00249618503423e-05	0.00126838034671056	1.70630600022906
C22orf27	-0.384837	6.46599816666667	-4.67868	5.99010861530962e-06	0.000276170758804893	3.67301505940026
ARIH2	-0.387898	6.74432874753086	-2.65251	0.00877069245060549	0.0411347690754723	-2.95856
ZNF101	-0.38807	5.91463352654321	-5.7706	3.82097936956029e-08	9.46201857882113e-06	8.4055209166522
RPS6KA3	-0.393163	6.2140071845679	-5.92881	1.73877989732007e-08	8.43187279874366e-06	9.14649600602647
TSHZ1	-0.398838	5.98808913641975	-5.96363	1.45968212528469e-08	8.34152192979996e-06	9.31126023189721
MED10	-0.405731	7.62419942037037	-4.33912	2.48748499032926e-05	0.00076457762383185	2.35178832668616
SLAIN1	-0.41352	6.46868392283951	-4.8015	3.51448893247981e-06	0.00019779650211661	4.16953300003396
CARD11	-0.414289	5.95994896481481	-3.51665	0.000564747270974912	0.00669139948336942	-0.512583
OSBPL8	-0.426794	7.35525774320988	-3.39761	0.000852325337050118	0.00878214275859269	-0.885196
NARG1L	-0.427369	5.07889126790123	-5.34164	3.02090520815823e-07	3.93724645463289e-05	6.4637096049168
RPL14	-0.428658	8.66592466481482	-4.56625	9.67754646336128e-06	0.000384462527680807	3.22707323982186
TAF15	-0.431503	7.58137367222222	-5.7405	4.43196738980661e-08	1.01668640063846e-05	8.26600304052307
ATP8B2	-0.432152	6.40779052654321	-4.19423	4.4617663653601e-05	0.00116303376590387	1.81184274397407
TRAT1	-0.449366	6.45921741666667	-4.70286	5.39715368059643e-06	0.000259866662065687	3.7700130572195
NUCKS1	-0.45151	8.32649043765432	-5.27428	4.14102298248721e-07	4.88312059315834e-05	6.16813629595206
MAL	-0.452475	8.25182517654321	-3.9117	0.000133766468416862	0.00257467728977506	0.80157614575803
MRPS31	-0.456067	8.17070369135802	-5.64851	6.95288804476208e-08	1.43480570234826e-05	7.84264294082287
HCST	-0.467572	8.92266897839506	-2.72045	0.00721928832403359	0.0359946932612386	-2.78859
CD96	-0.469093	7.24560948209877	-4.99916	1.46100075731876e-06	0.000116707254044312	4.98858110621652
PAPD5	-0.481631	7.14540544074074	-4.21529	4.10221150900007e-05	0.00110926939554769	1.88939527284245
ATF7IP2	-0.499127	4.99502574074074	-4.88246	2.46033060389168e-06	0.000158937357011403	4.50203476874877
CYP4B1	-0.506203	4.94478279753086	-4.93528	1.94534554464063e-06	0.000135427250535211	4.72120295462833
AXUD1	-0.51428	9.27500438024691	-4.01571	8.98677785562805e-05	0.00192399921295276	1.16683449246019
KLF12	-0.514703	5.21274666666667	-5.03839	1.22398893968527e-06	0.000102168694751931	5.15397661922587
LCK	-0.517764	5.18669799320988	-3.46131	0.000684735354260098	0.00755854226864528	-0.687179
IGJ	-0.524377	8.53526651234568	-3.41316	0.000808198249124746	0.00848037400105613	-0.837155
C12orf45	-0.55717	5.70576770246914	-3.59662	0.000425790745298609	0.00544440524410218	-0.256068
PGRMC2	-0.590718	8.07651159567901	-3.57087	0.000466562240217864	0.00579685714972978	-0.339191
FOSB	-0.591919	6.59889859382716	-2.99252	0.00319264524642348	0.0211203575562601	-2.06898
G0S2	-0.602097	5.12571174876543	-3.52295	0.000552412633099135	0.00659671105591741	-0.49255
PTGS2	-0.646719	9.35068766049383	-4.66291	6.41021589158143e-06	0.000289819893292234	3.60995736928111
IL8	-0.851596	9.52336388827161	-5.39914	2.30312741321635e-07	3.26676986372568e-05	6.71810000354485
SLC25A24	-0.947421	5.78615045925926	-5.79616	3.36766688534829e-08	8.93514188973303e-06	8.52432191788728

## Sheet: S2
pos.exposure	pval.exposure	se.exposure	samplesize.exposure	chr.exposure	beta.exposure	id.exposure	SNP	effect_allele.exposure	other_allele.exposure	eaf.exposure	exposure	mr_keep.exposure	pval_origin.exposure	data_source.exposure	R2	F
27958339	5.56545e-29	0.0253262	29937	1	0.282954	eqtl-a-ENSG00000000938	rs34806307	T	C	0.0581208	FGR	TRUE	reported	igd	0.00415218131967595	124.813797322179
179168097	6.08275e-17	0.0129886	31684	5	-0.10863	eqtl-a-ENSG00000000938	rs17617068	C	T	0.297362	FGR	TRUE	reported	igd	0.00220281054099777	69.9435158739328
173205318	2.4797e-13	0.0137126	31569	5	0.100376	eqtl-a-ENSG00000000938	rs2594836	A	G	0.749651	FGR	TRUE	reported	igd	0.00169442685141153	53.5787577042272
144385777	3.13329e-12	0.026612	25735	6	0.185528	eqtl-a-ENSG00000000938	rs149110519	T	C	0.0526158	FGR	TRUE	reported	igd	0.00188503877982625	48.5993145138005
42515791	1.22651e-08	0.0146022	27823	6	0.0831772	eqtl-a-ENSG00000000938	rs16895831	T	C	0.209742	FGR	TRUE	reported	igd	0.00116482820790028	32.444477814943
28724374	3.53932e-09	0.0131112	31355	7	0.0774135	eqtl-a-ENSG00000000938	rs56388170	T	G	0.289189	FGR	TRUE	reported	igd	0.00111060370912212	34.8594731522868
50370254	6.78578e-23	0.0166246	30077	7	-0.163765	eqtl-a-ENSG00000000938	rs149007767	T	C	0.149708	FGR	TRUE	reported	igd	0.00321592819637817	97.0311
309508	1.6263e-13	0.0149798	17978	11	-0.110495	eqtl-a-ENSG00000000938	rs741738	A	G	0.195461	FGR	TRUE	reported	igd	0.00301730676021286	54.403257638637
40974023	4.4948e-10	0.0292309	29277	13	0.182278	eqtl-a-ENSG00000000938	rs77526211	A	G	0.0432109	FGR	TRUE	reported	igd	0.0013264201875046	38.8825255560359
196678432	4.5436e-37	0.01205	31529	1	0.153282	eqtl-a-ENSG00000000971	rs203683	C	G	0.593851	CFH	TRUE	reported	igd	0.00510593014244289	161.800803198922
197223447	9.97011e-11	0.0288023	29788	1	-0.186279	eqtl-a-ENSG00000000971	rs523427	G	A	0.95544	CFH	TRUE	reported	igd	0.00140224111973417	41.8258038544327
169497585	1.41775e-18	0.0137489	31644	3	-0.120934	eqtl-a-ENSG00000000971	rs1317082	G	A	0.247755	CFH	TRUE	reported	igd	0.0024389843970142	77.3630315170992
35874575	1.44981e-08	0.0135048	31259	5	-0.0765344	eqtl-a-ENSG00000000971	rs6897932	T	C	0.262908	CFH	TRUE	reported	igd	0.00102639843549456	32.1150987854026
53515483	1.80418e-08	0.014345	31315	6	-0.0807579	eqtl-a-ENSG00000001084	rs6942249	A	G	0.220282	GCLC	TRUE	reported	igd	0.0010110606146094	31.6913829343717
53443269	1.19316e-43	0.0151051	31644	6	-0.209273	eqtl-a-ENSG00000001084	rs809942	A	G	0.188827	GCLC	TRUE	reported	igd	0.00602922415712664	191.933923427503
53370107	1.6761e-71	0.0118763	31644	6	-0.212352	eqtl-a-ENSG00000001084	rs661603	C	T	0.433538	GCLC	TRUE	reported	igd	0.0100021478256222	319.68550315864
45937610	4.89734e-08	0.0125754	30696	6	-0.0685989	eqtl-a-ENSG00000001561	rs2057148	C	G	0.662706	ENPP4	TRUE	reported	igd	0.000968474286294021	29.7551668574945
46077847	1e-200	0.0229873	31355	6	-0.81601	eqtl-a-ENSG00000001561	rs56139334	T	C	0.0658828	ENPP4	TRUE	reported	igd	0.038636335874173	1260.04870359277
46042757	1e-200	0.0116326	31132	6	0.460012	eqtl-a-ENSG00000001561	rs7744030	T	C	0.380286	ENPP4	TRUE	reported	igd	0.0478291426325513	1563.71222520701
46471256	3.5009e-09	0.0230028	31355	6	0.135859	eqtl-a-ENSG00000001561	rs77868167	T	C	0.0719597	ENPP4	TRUE	reported	igd	0.00111128568911133	34.8809028588778
18093497	2.96108e-10	0.0252506	25173	4	-0.159097	eqtl-a-ENSG00000002549	rs148021887	A	C	0.0588673	LAP3	TRUE	reported	igd	0.00157456732893753	39.6959381640113
17330381	2.72621e-10	0.0135529	28533	4	0.0855677	eqtl-a-ENSG00000002549	rs2872795	C	T	0.740191	LAP3	TRUE	reported	igd	0.00139508770453699	39.8588538951308
17914257	1.87456e-49	0.0336696	23500	4	0.497758	eqtl-a-ENSG00000002549	rs112570672	A	G	0.0317809	LAP3	TRUE	reported	igd	0.00921451238473378	218.536317621714
17533328	7.54223e-92	0.0141406	28799	4	-0.287426	eqtl-a-ENSG00000002549	rs1609903	C	G	0.779076	LAP3	TRUE	reported	igd	0.0141433660797248	413.129555540194
17797314	7.6366e-24	0.0453355	23593	4	-0.456437	eqtl-a-ENSG00000002549	rs150530659	C	T	0.0174155	LAP3	TRUE	reported	igd	0.00427799038350058	101.355669717527
17540848	1e-200	0.0147013	24204	4	0.508059	eqtl-a-ENSG00000002549	rs28727456	G	A	0.185536	LAP3	TRUE	reported	igd	0.0470231815882326	1194.21062381674
131813204	1.59331e-08	0.0131962	28473	5	-0.0745715	eqtl-a-ENSG00000002549	rs13164856	C	T	0.283115	LAP3	TRUE	reported	igd	0.00112028351685749	31.9313641894218
28539848	1.34153e-14	0.012035	28533	16	-0.0926903	eqtl-a-ENSG00000002549	rs4788084	T	C	0.419635	LAP3	TRUE	reported	igd	0.00207456497779599	59.3124609357015
150536031	1.76279e-15	0.0379894	19650	7	-0.302282	eqtl-a-ENSG00000002726	rs13226058	A	G	0.0250636	AOC1	TRUE	reported	igd	0.00321173767178462	63.307549015305
150596308	6.27191e-25	0.0285358	25983	7	0.294244	eqtl-a-ENSG00000002726	rs765483	T	C	0.0452219	AOC1	TRUE	reported	igd	0.00407541917806883	106.316750991346
150658795	9.21722e-73	0.0304821	23989	7	0.549942	eqtl-a-ENSG00000002726	rs73167624	A	G	0.0387678	AOC1	TRUE	reported	igd	0.013386861208252	325.467629790119
150186821	9.05691e-10	0.0488658	4993	7	0.299313	eqtl-a-ENSG00000002726	rs77270862	G	T	0.015021	AOC1	TRUE	reported	igd	0.00745810365914791	37.5030973503855
150435443	1e-200	0.0122357	25885	7	0.398501	eqtl-a-ENSG00000002726	rs9657890	T	C	0.327004	AOC1	TRUE	reported	igd	0.0393651019915356	1060.63910124358
2478609	5.75241e-09	0.0444577	15975	7	0.258917	eqtl-a-ENSG00000002822	rs146817114	A	G	0.018211	MAD1L1	TRUE	reported	igd	0.00211867907469763	33.9135127098731
1929255	7.00648e-16	0.0448661	25036	7	-0.362079	eqtl-a-ENSG00000002822	rs73288749	T	C	0.0178348	MAD1L1	TRUE	reported	igd	0.00259463809421535	65.1231410331265
1989888	1e-200	0.01209	30902	7	0.365474	eqtl-a-ENSG00000002822	rs7801421	G	C	0.35037	MAD1L1	TRUE	reported	igd	0.0287221706732373	913.760251706979
2117261	3.25087e-86	0.0152919	31017	7	0.300934	eqtl-a-ENSG00000002822	rs3800875	T	C	0.179747	MAD1L1	TRUE	reported	igd	0.0123319241062023	387.250165808732
1843708	4.42792e-25	0.0401381	28417	7	-0.415204	eqtl-a-ENSG00000002822	rs75649291	T	C	0.0223203	MAD1L1	TRUE	reported	igd	0.00375144783873465	106.998790719838
1614662	1.63343e-13	0.0328778	5668	7	-0.242497	eqtl-a-ENSG00000002822	rs6463939	G	A	0.0337862	MAD1L1	TRUE	reported	igd	0.00950668164052359	54.3818491016389
148200011	2.1709e-08	0.0120539	31569	5	0.0674741	eqtl-a-ENSG00000002919	rs56330463	C	T	0.582097	SNX11	TRUE	reported	igd	0.000991579081829487	31.332245275113
46552897	1.49279e-132	0.0313353	31236	17	-0.767698	eqtl-a-ENSG00000002919	rs11079822	A	G	0.0358931	SNX11	TRUE	reported	igd	0.0188534814299324	600.185219880037
45986496	1e-200	0.0202656	31562	17	-0.702722	eqtl-a-ENSG00000002919	rs78317601	G	A	0.0870616	SNX11	TRUE	reported	igd	0.036698302620283	1202.32159233868
46073854	1.24291e-10	0.0522445	21129	17	0.336141	eqtl-a-ENSG00000002919	rs118036504	C	T	0.013112	SNX11	TRUE	reported	igd	0.00195538749138283	41.3924097306706
46092539	9.90832e-168	0.017994	31567	17	-0.496707	eqtl-a-ENSG00000002919	rs1473117	T	C	0.117639	SNX11	TRUE	reported	igd	0.0235696476090304	761.934453345579
43721508	3.09393e-10	0.0120214	31300	2	0.0756615	eqtl-a-ENSG00000002933	rs12478601	T	C	0.574604	TMEM176A	TRUE	reported	igd	0.00126399735723156	39.610657052466
128297569	1.6308e-08	0.0121727	31569	3	-0.0687407	eqtl-a-ENSG00000002933	rs9880192	C	G	0.392874	TMEM176A	TRUE	reported	igd	0.00100914773390054	31.8879461646491
150082342	3.74628e-39	0.018904	31355	7	-0.247459	eqtl-a-ENSG00000002933	rs4725338	A	G	0.889954	TMEM176A	TRUE	reported	igd	0.00543532247636781	171.344980827062
150598659	1.16413e-57	0.0193687	31684	7	0.310011	eqtl-a-ENSG00000002933	rs17173656	C	T	0.103442	TMEM176A	TRUE	reported	igd	0.00802076587086906	256.168572464083
150669976	4.67627e-10	0.0159547	31231	7	-0.0993911	eqtl-a-ENSG00000002933	rs3778872	G	C	0.166501	TMEM176A	TRUE	reported	igd	0.00124105920216111	38.8051973715789
150153771	1.0782e-59	0.0251818	31200	7	0.41033	eqtl-a-ENSG00000002933	rs71537963	T	C	0.0582201	TMEM176A	TRUE	reported	igd	0.0084383614141328	265.500387624483
150186821	4.3421e-21	0.0487775	4993	7	0.459684	eqtl-a-ENSG00000002933	rs77270862	G	T	0.015021	TMEM176A	TRUE	reported	igd	0.0174767617244223	88.7780709590978
150496529	1.55239e-182	0.0143821	31270	7	-0.414367	eqtl-a-ENSG00000002933	rs7781584	G	A	0.79708	TMEM176A	TRUE	reported	igd	0.0258594599109024	830.037924938575
150206215	1e-200	0.011662	31676	7	-0.358062	eqtl-a-ENSG00000002933	rs59621822	G	A	0.423537	TMEM176A	TRUE	reported	igd	0.0289003986652217	942.633717554849
57885709	3.83796e-11	0.0207568	31569	17	-0.137207	eqtl-a-ENSG00000002933	rs7212590	T	C	0.0900785	TMEM176A	TRUE	reported	igd	0.00138219785490225	43.6922309936547
9082391	8.56249e-12	0.0489682	9433	12	0.334399	eqtl-a-ENSG00000003056	rs117302528	T	C	0.0149475	M6PR	TRUE	reported	igd	0.00491937686668859	46.6240042778168
9143781	3.65847e-14	0.0500134	20275	12	-0.378731	eqtl-a-ENSG00000003056	rs76450399	A	G	0.0143092	M6PR	TRUE	reported	igd	0.00282034020344806	57.3384709392968
9308551	1.53003e-30	0.0215805	31354	12	-0.247904	eqtl-a-ENSG00000003056	rs6487636	C	G	0.917903	M6PR	TRUE	reported	igd	0.00419109124951808	131.952116214513
9061971	1e-200	0.0135131	31355	12	0.479323	eqtl-a-ENSG00000003056	rs11047939	A	G	0.231883	M6PR	TRUE	reported	igd	0.0385792040405895	1258.11069343217
9479318	2.113e-11	0.0125755	29994	12	-0.0842297	eqtl-a-ENSG00000003056	rs4262771	C	G	0.33655	M6PR	TRUE	reported	igd	0.00149347001283925	44.8591484180388
72189602	1.39531e-10	0.0299847	30971	2	-0.192394	eqtl-a-ENSG00000003137	rs981390	A	G	0.0409627	CYP26B1	TRUE	reported	igd	0.00132755178893039	41.1676034770273
72369839	1e-200	0.0377241	26141	2	1.206	eqtl-a-ENSG00000003137	rs114857151	T	C	0.0237762	CYP26B1	TRUE	reported	igd	0.0376252057453402	1021.93579762149
72822429	1.54206e-16	0.0459779	16628	2	0.379474	eqtl-a-ENSG00000003137	rs141151334	G	T	0.0169641	CYP26B1	TRUE	reported	igd	0.00407990702479158	68.1104183685482
72456543	1e-200	0.0181271	31182	2	1.17139	eqtl-a-ENSG00000003137	rs72835275	C	T	0.0915783	CYP26B1	TRUE	reported	igd	0.118102839735027	4175.59632670971
72787000	2.1717e-12	0.0353007	24524	2	-0.247913	eqtl-a-ENSG00000003137	rs17561305	A	G	0.0291789	CYP26B1	TRUE	reported	igd	0.00200709584920469	49.3169883367834
89656545	1.1944e-09	0.0228086	27979	16	-0.138697	eqtl-a-ENSG00000003249	rs12927153	G	T	0.0732841	DBNDD1	TRUE	reported	igd	0.00131986981838157	36.974799831199
90018389	5.16654e-29	0.0185776	25662	16	-0.207678	eqtl-a-ENSG00000003249	rs11859970	C	T	0.114951	DBNDD1	TRUE	reported	igd	0.00484620157551116	124.959109460759
90067079	3.41193e-41	0.0173184	30398	16	-0.232799	eqtl-a-ENSG00000003249	rs35991606	C	T	0.134779	DBNDD1	TRUE	reported	igd	0.00590918705752588	180.683341463443
89787968	1e-200	0.0235533	30817	16	0.721765	eqtl-a-ENSG00000003249	rs147792551	G	C	0.0639616	DBNDD1	TRUE	reported	igd	0.0295707030464549	938.987742061261
202153789	5.27716e-20	0.0212098	30873	2	0.194245	eqtl-a-ENSG00000003393	rs17383714	T	C	0.0856074	ALS2	TRUE	reported	igd	0.00270937708391125	83.8684111085459
202557374	1.52055e-125	0.0199742	30077	2	-0.476044	eqtl-a-ENSG00000003393	rs78003444	A	G	0.0942325	ALS2	TRUE	reported	igd	0.0185351304335175	567.971473124927
202566411	1.24451e-42	0.049337	22434	2	-0.675177	eqtl-a-ENSG00000003393	rs3219172	C	T	0.0145746	ALS2	TRUE	reported	igd	0.00827890007512697	187.262614962328
202549620	1e-200	0.0257605	30077	2	-0.895928	eqtl-a-ENSG00000003393	rs10432516	A	G	0.0518559	ALS2	TRUE	reported	igd	0.0386615652489275	1209.50804922574
203574996	4.0977e-09	0.0375348	8025	2	-0.220705	eqtl-a-ENSG00000003393	rs75664718	A	G	0.0257445	ALS2	TRUE	reported	igd	0.00428986886689856	34.5659011021214
43116830	1.44381e-10	0.012782	31684	5	0.0819467	eqtl-a-ENSG00000003393	rs1532331	T	G	0.683885	ALS2	TRUE	reported	igd	0.00129557417288265	41.0996285625488
201728141	1.13339e-10	0.0120475	25826	2	-0.0776808	eqtl-a-ENSG00000003402	rs6757272	G	A	0.418416	CFLAR	TRUE	reported	igd	0.00160722911161348	41.5719001464469
201595517	1.35329e-08	0.0215981	26609	2	0.12266	eqtl-a-ENSG00000003402	rs10200697	A	G	0.917415	CFLAR	TRUE	reported	igd	0.00121065436681741	32.2509254616548
202022527	1e-200	0.011476	25575	2	0.375611	eqtl-a-ENSG00000003402	rs2268791	C	G	0.498612	CFLAR	TRUE	reported	igd	0.0402030719166105	1071.17779609538
28724374	1.42298e-08	0.0131124	26280	7	0.0743565	eqtl-a-ENSG00000003402	rs56388170	T	G	0.289189	CFLAR	TRUE	reported	igd	0.00122212900273694	32.1544027621027
188415764	2.01229e-10	0.0324332	30169	2	0.206291	eqtl-a-ENSG00000003436	rs35007051	G	A	0.0347892	TFPI	TRUE	reported	igd	0.00133917724053377	40.4531337311833
56849749	2.14783e-11	0.0122309	31684	3	0.0818935	eqtl-a-ENSG00000003436	rs1354034	C	T	0.618137	TFPI	TRUE	reported	igd	0.00141295378711734	44.8285425424077
135411228	1.25806e-14	0.0134923	31300	6	0.104028	eqtl-a-ENSG00000003436	rs9376090	C	T	0.262879	TFPI	TRUE	reported	igd	0.00189565860593719	59.443006695828
144385777	2.01558e-12	0.0266112	25735	6	0.18717	eqtl-a-ENSG00000004059	rs149110519	T	C	0.0526158	ARF5	TRUE	reported	igd	0.0019186040224864	49.4663436365214
50370254	5.01996e-16	0.0166429	30077	7	-0.134987	eqtl-a-ENSG00000004059	rs149007767	T	C	0.149708	ARF5	TRUE	reported	igd	0.002182440990623	65.7804747975676
127230474	1.39894e-17	0.012286	31564	7	-0.104862	eqtl-a-ENSG00000004059	rs34029720	C	T	0.371437	ARF5	TRUE	reported	igd	0.00230261881394828	72.8429846327152
15753299	1.31311e-18	0.0169156	31349	4	0.148937	eqtl-a-ENSG00000004468	rs10000290	G	A	0.143801	CD38	TRUE	reported	igd	0.00246680066188558	77.5180218557492
94485211	4.68824e-10	0.0118872	31086	10	0.0740464	eqtl-a-ENSG00000004468	rs2497306	C	A	0.500343	CD38	TRUE	reported	igd	0.00124664318571293	38.7990253252347
10560957	3.21514e-12	0.0126168	31086	12	-0.0879154	eqtl-a-ENSG00000004468	rs2617170	C	T	0.668027	CD38	TRUE	reported	igd	0.00155951234304508	48.5515984883305
28490517	3.39e-08	0.012098	30476	16	-0.066781	eqtl-a-ENSG00000004468	rs151181	C	T	0.407827	CD38	TRUE	reported	igd	0.000998818810105717	30.4684368670189
38053207	3.09813e-08	0.011892	31355	17	-0.0658343	eqtl-a-ENSG00000004468	rs12453507	G	C	0.492239	CD38	TRUE	reported	igd	0.000976480445885181	30.6455161671293
50124046	6.14469e-99	0.0352007	18493	3	-0.743165	eqtl-a-ENSG00000004534	rs76298543	C	T	0.0285268	RBM6	TRUE	reported	igd	0.0235351590156471	445.67772140124
50456570	5.26623e-17	0.0479963	20074	3	0.402247	eqtl-a-ENSG00000004534	rs116375541	A	G	0.0155425	RBM6	TRUE	reported	igd	0.00348673765777333	70.2306742033017
49385417	1e-200	0.0124186	26096	3	0.426905	eqtl-a-ENSG00000004534	rs13086611	T	A	0.304928	RBM6	TRUE	reported	igd	0.0433220525250515	1181.63655969325
50243510	8.20352e-157	0.0190918	23341	3	-0.509349	eqtl-a-ENSG00000004534	rs2236939	T	G	0.103161	RBM6	TRUE	reported	igd	0.0295918515303004	711.704888252229
47481533	3.45621e-08	0.0119728	31185	11	-0.0660466	eqtl-a-ENSG00000004534	rs7950696	C	T	0.441548	RBM6	TRUE	reported	igd	0.000974855275444008	30.4285755115322
36078082	2.7227e-10	0.0130905	29827	19	0.0826533	eqtl-a-ENSG00000004777	rs12984019	T	C	0.290562	ARHGAP33	TRUE	reported	igd	0.00133480635326494	39.8638099529174
36079704	1e-200	0.0115262	31346	19	-0.389125	eqtl-a-ENSG00000004777	rs756783	T	C	0.557326	ARHGAP33	TRUE	reported	igd	0.0350843306199217	1139.66773869195
36164495	8.18465e-155	0.0221543	31682	19	-0.587228	eqtl-a-ENSG00000004777	rs113559151	G	A	0.0742662	ARHGAP33	TRUE	reported	igd	0.0216949743372749	702.53833822358
94777819	5.54498e-19	0.0453314	21984	7	0.40349	eqtl-a-ENSG00000004799	rs117629564	A	G	0.0174463	PDK4	TRUE	reported	igd	0.00359085836676291	79.2187117922255
95175185	1.044e-99	0.0118704	31565	7	-0.251601	eqtl-a-ENSG00000004799	rs12704801	C	T	0.420253	PDK4	TRUE	reported	igd	0.0140330025149574	449.227671422461
95249487	2.54507e-12	0.035039	28311	7	-0.245298	eqtl-a-ENSG00000004799	rs142272045	C	T	0.0296307	PDK4	TRUE	reported	igd	0.00172813723961908	49.0065271208786
46627603	6.00759e-20	0.019784	31185	22	0.180909	eqtl-a-ENSG00000004799	rs4253772	T	C	0.0999617	PDK4	TRUE	reported	igd	0.0026741358906239	83.6111671001243
110728379	1e-200	0.0120986	31684	6	-0.389752	eqtl-a-ENSG00000004809	rs17577280	A	G	0.343249	SLC22A16	TRUE	reported	igd	0.0317153501397309	1037.71729033601
110357358	9.17487e-15	0.0125738	31564	6	0.0974519	eqtl-a-ENSG00000004809	rs9372244	C	T	0.336007	SLC22A16	TRUE	reported	igd	0.00189945838040848	60.064795982549
110798217	1e-200	0.016526	20794	6	-0.679832	eqtl-a-ENSG00000004809	rs13205109	A	T	0.133692	SLC22A16	TRUE	reported	igd	0.0752576122195542	1692.0996527743
110851976	6.90399e-68	0.0155592	30746	6	0.270889	eqtl-a-ENSG00000004809	rs1080261	G	T	0.173269	SLC22A16	TRUE	reported	igd	0.00976245353348558	303.095830393894
57838583	3.05823e-10	0.0147706	31300	4	0.0929941	eqtl-a-ENSG00000004864	rs17087335	T	G	0.203202	SLC25A13	TRUE	reported	igd	0.00126479615780846	39.6357212550446
95795988	1e-200	0.0118328	31179	7	0.400006	eqtl-a-ENSG00000004864	rs1016968	A	T	0.373698	SLC25A13	TRUE	reported	igd	0.0353559782793856	1142.69441368669
96379688	4.03376e-09	0.0380244	27713	7	0.22369	eqtl-a-ENSG00000004864	rs145659320	G	T	0.0250685	SLC25A13	TRUE	reported	igd	0.00124721940398074	34.604856752524
56849749	6.56599e-37	0.012181	31684	3	0.154599	eqtl-a-ENSG00000004866	rs1354034	C	T	0.618137	ST7	TRUE	reported	igd	0.00505830602739078	161.072003043634
116635048	3.92645e-16	0.0142758	31684	7	-0.116213	eqtl-a-ENSG00000004866	rs12706135	C	T	0.222519	ST7	TRUE	reported	igd	0.00208718579252464	66.2645266573532
116799440	3.27612e-08	0.031743	28396	7	0.175412	eqtl-a-ENSG00000004866	rs2402155	T	C	0.036405	ST7	TRUE	reported	igd	0.0010742335461819	30.5345885896707
118153011	1.34493e-12	0.0156893	26022	1	-0.111228	eqtl-a-ENSG00000004939	rs11587735	C	A	0.173499	SLC4A1	TRUE	reported	igd	0.00192771330971404	50.255979439217
205249450	2.50098e-08	0.0120451	26022	1	-0.0671283	eqtl-a-ENSG00000004939	rs9660992	G	A	0.420138	SLC4A1	TRUE	reported	igd	0.00119215232893562	31.0568280688163
30128442	1.6214e-09	0.0235888	21683	6	-0.142278	eqtl-a-ENSG00000004939	rs12212092	T	C	0.068141	SLC4A1	TRUE	reported	igd	0.00167500605522268	36.3767375389299
42326258	2.25736e-66	0.0129543	22267	17	0.222934	eqtl-a-ENSG00000004939	rs5033	T	C	0.707969	SLC4A1	TRUE	reported	igd	0.0131257707626131	296.132250059275
33946107	5.52841e-29	0.0119365	25693	17	-0.133365	eqtl-a-ENSG00000004939	rs225245	G	A	0.440335	SLC4A1	TRUE	reported	igd	0.00483514992556148	124.823376477081
11297258	4.36918e-19	0.0244285	26022	19	0.218083	eqtl-a-ENSG00000004939	rs12974711	C	T	0.0629954	SLC4A1	TRUE	reported	igd	0.00305338280879177	79.6923519421743
44576502	8.69501e-09	0.0153516	25553	20	0.0883408	eqtl-a-ENSG00000004939	rs7679	C	T	0.183703	SLC4A1	TRUE	reported	igd	0.0012942287065365	33.1116917827414
4157072	3.02482e-54	0.012249	26022	20	0.189967	eqtl-a-ENSG00000004939	rs6084653	G	C	0.36636	SLC4A1	TRUE	reported	igd	0.00915837933482157	240.503653986678
55991637	7.75961e-09	0.0118917	21737	20	0.0686581	eqtl-a-ENSG00000004939	rs6014993	G	A	0.490224	SLC4A1	TRUE	reported	igd	0.00153119523253718	33.3315655134028
26833308	6.21441e-71	0.036818	28045	7	-0.655621	eqtl-a-ENSG00000005020	rs117299259	G	A	0.0262465	SKAP2	TRUE	reported	igd	0.0111801353968462	317.069
26941945	2.4149e-20	0.0510069	10978	7	0.471421	eqtl-a-ENSG00000005020	rs142139359	A	G	0.0137218	SKAP2	TRUE	reported	igd	0.00772094728411371	85.4045211964145
27074801	3.62744e-26	0.0495654	8581	7	0.524481	eqtl-a-ENSG00000005020	rs113662511	T	C	0.0145161	SKAP2	TRUE	reported	igd	0.0128805408843749	111.944060292412
26694926	1e-200	0.0134186	28198	7	0.568574	eqtl-a-ENSG00000005020	rs7805778	A	G	0.225286	SKAP2	TRUE	reported	igd	0.0598596229893676	1795.2658678217
26756193	6.3387e-13	0.0531357	14813	7	0.382211	eqtl-a-ENSG00000005020	rs147544721	C	A	0.0126608	SKAP2	TRUE	reported	igd	0.00348077706759825	51.7338631928175
26970217	6.81868e-15	0.0528234	9956	7	0.411383	eqtl-a-ENSG00000005020	rs113285204	T	C	0.0128048	SKAP2	TRUE	reported	igd	0.00605504569159368	60.6390973190875
27020453	5.15585e-25	0.0512092	20857	7	-0.528981	eqtl-a-ENSG00000005020	rs117435545	T	C	0.0135914	SKAP2	TRUE	reported	igd	0.00508998060415019	106.694619041038
27106284	7.07946e-104	0.0302517	24524	7	-0.654735	eqtl-a-ENSG00000005020	rs185084812	T	C	0.0389834	SKAP2	TRUE	reported	igd	0.0187423182192631	468.377609578263
26858395	1e-200	0.0131295	30967	7	0.669998	eqtl-a-ENSG00000005020	rs10275896	C	T	0.223386	SKAP2	TRUE	reported	igd	0.0775685387830228	2603.88972449772
26982213	1.9391e-14	0.0288606	2516	7	-0.220911	eqtl-a-ENSG00000005020	rs181684511	G	T	0.0443164	SKAP2	TRUE	reported	igd	0.0227570457712717	58.5434899493647
27221227	6.04644e-41	0.0377964	26296	7	-0.506468	eqtl-a-ENSG00000005020	rs67971665	T	C	0.0251157	SKAP2	TRUE	reported	igd	0.00678200393181999	179.543677308716
101960060	1e-200	0.02478	28468	7	0.846724	eqtl-a-ENSG00000005075	rs78627998	C	G	0.0564699	POLR2J	TRUE	reported	igd	0.0393974326204694	1167.48315594621
102901859	2.65522e-24	0.047274	15415	7	-0.480843	eqtl-a-ENSG00000005075	rs147944569	A	C	0.0159909	POLR2J	TRUE	reported	igd	0.00666673732375504	103.444056724925
101642837	9.81974e-23	0.0461314	24343	7	0.452733	eqtl-a-ENSG00000005075	rs74739396	A	C	0.0168154	POLR2J	TRUE	reported	igd	0.00394095990136709	96.3064447963621
101991744	5.38394e-75	0.0131555	11384	7	-0.241054	eqtl-a-ENSG00000005075	rs71540934	G	A	0.723779	POLR2J	TRUE	reported	igd	0.0286480903917113	335.689425853861
102077619	2.73653e-20	0.0401852	15545	7	-0.370853	eqtl-a-ENSG00000005075	rs146928022	T	C	0.0223018	POLR2J	TRUE	reported	igd	0.00544888581103439	85.1560376863807
102108686	1e-200	0.021871	20836	7	0.983849	eqtl-a-ENSG00000005075	rs113296404	C	T	0.0696151	POLR2J	TRUE	reported	igd	0.0885220446559812	2023.38220858741
102753029	8.38147e-09	0.0546736	5660	7	-0.314947	eqtl-a-ENSG00000005075	rs138561863	G	A	0.0119658	POLR2J	TRUE	reported	igd	0.0058286025585372	33.1715772160356
103554773	1.74109e-10	0.0118871	31569	4	0.0758721	eqtl-a-ENSG00000005102	rs5026472	G	C	0.494224	MEOX1	TRUE	reported	igd	0.00128881761877379	40.7366078297324
90976768	2.54859e-12	0.0162832	29113	6	-0.11399	eqtl-a-ENSG00000005102	rs72928038	A	G	0.158151	MEOX1	TRUE	reported	igd	0.00168049254436286	49.0031679172824
41443647	7.63185e-10	0.0276328	30017	17	-0.170008	eqtl-a-ENSG00000005102	rs147832718	G	T	0.0486328	MEOX1	TRUE	reported	igd	0.0012594308735035	37.8494864800266
41869576	2.4027e-14	0.0474188	24801	17	-0.361654	eqtl-a-ENSG00000005102	rs112684675	T	C	0.0159434	MEOX1	TRUE	reported	igd	0.00233990828262222	58.1634827157011
41983417	8.58242e-09	0.0187186	30902	17	0.107757	eqtl-a-ENSG00000005102	rs72836582	T	C	0.113815	MEOX1	TRUE	reported	igd	0.00107125331564187	33.1372258163606
41695326	1e-200	0.0115903	31383	17	0.389037	eqtl-a-ENSG00000005102	rs35953779	C	G	0.423863	MEOX1	TRUE	reported	igd	0.0346561286821706	1126.58712246295
33063675	7.00164e-49	0.0133996	31684	17	0.1969	eqtl-a-ENSG00000005156	rs12941768	G	A	0.735973	LIG3	TRUE	reported	igd	0.00676889954996445	215.913774190926
33593024	1.59404e-25	0.0185784	31355	17	0.193998	eqtl-a-ENSG00000005156	rs2291190	C	T	0.115088	LIG3	TRUE	reported	igd	0.00346548025709207	109.031047442931
33123582	1e-200	0.011772	31566	17	0.430557	eqtl-a-ENSG00000005156	rs12450763	C	A	0.371504	LIG3	TRUE	reported	igd	0.040655188659218	1337.62163475518
34136037	1.26099e-10	0.0211365	31684	17	-0.135946	eqtl-a-ENSG00000005156	rs4251710	C	A	0.0865497	LIG3	TRUE	reported	igd	0.0013039473262102	41.3655977495743
50370254	7.78037e-20	0.0166327	30037	7	0.15163	eqtl-a-ENSG00000005175	rs149007767	T	C	0.149708	RPAP3	TRUE	reported	igd	0.0027592320833781	83.1028356345637
47831561	6.42096e-11	0.0335031	29619	12	0.218903	eqtl-a-ENSG00000005175	rs75647145	A	G	0.0325212	RPAP3	TRUE	reported	igd	0.00143925430627248	42.6878334369717
48050792	3.41271e-28	0.014417	30124	12	0.158735	eqtl-a-ENSG00000005175	rs7976419	C	G	0.215353	RPAP3	TRUE	reported	igd	0.00400810197529375	121.21790140988
47960581	1e-200	0.0203231	31527	12	-0.818859	eqtl-a-ENSG00000005175	rs61918136	A	C	0.0839687	RPAP3	TRUE	reported	igd	0.0489721245159159	1623.34487259736
35014767	1.72302e-10	0.0145428	25572	9	-0.0928409	eqtl-a-ENSG00000005238	rs35426954	A	G	0.211921	ATOSB	TRUE	reported	igd	0.00159120568837487	40.7519742249446
35040245	3.78704e-18	0.0456896	18937	9	-0.39681	eqtl-a-ENSG00000005238	rs10491510	T	C	0.0171736	ATOSB	TRUE	reported	igd	0.00396728070923272	75.4196712361133
4157072	3.35197e-17	0.0123219	30650	20	0.103918	eqtl-a-ENSG00000005238	rs6084653	G	C	0.36636	ATOSB	TRUE	reported	igd	0.00231520299291465	71.1210008809468
56849749	2.96483e-158	0.01195	31684	3	0.320298	eqtl-a-ENSG00000005249	rs1354034	C	T	0.618137	PRKAR2B	TRUE	reported	igd	0.0221715126612164	718.365105157024
106655445	1.20476e-41	0.0118347	31684	7	-0.159996	eqtl-a-ENSG00000005249	rs6466154	G	A	0.482168	PRKAR2B	TRUE	reported	igd	0.00573542631229661	182.757971303578
65104500	1.13781e-08	0.0120339	31569	10	0.0687004	eqtl-a-ENSG00000005249	rs7896518	G	A	0.422848	PRKAR2B	TRUE	reported	igd	0.00103132792842173	32.5895392184591
243268	1.01836e-12	0.0142947	31569	11	0.101894	eqtl-a-ENSG00000005249	rs505404	G	T	0.222031	PRKAR2B	TRUE	reported	igd	0.00160689640656728	50.8065397122029
122216910	2.48863e-09	0.019026	30031	12	0.113437	eqtl-a-ENSG00000005249	rs11553699	G	A	0.10963	PRKAR2B	TRUE	reported	igd	0.00118230877304248	35.5455759920309
28724374	9.30679e-13	0.0131037	9188	7	-0.0935656	eqtl-a-ENSG00000005302	rs56388170	T	G	0.289189	MSL3	TRUE	reported	igd	0.00551848996096758	50.9741491115894
50370254	1.6293e-22	0.0166256	8025	7	0.162309	eqtl-a-ENSG00000005302	rs149007767	T	C	0.149708	MSL3	TRUE	reported	igd	0.0117370250892357	95.2845089632551
61679038	6.99359e-14	0.0144789	9188	8	-0.108421	eqtl-a-ENSG00000005302	rs13277976	T	A	0.785822	MSL3	TRUE	reported	igd	0.00606585887548617	56.0610379749855
31390410	4.42976e-08	0.012059	30773	6	0.065995	eqtl-a-ENSG00000005379	rs2516448	C	T	0.583185	TSPOAP1	TRUE	reported	igd	0.000972315396045355	29.9482361828366
139932927	2.5787e-10	0.0131332	23577	9	-0.0830294	eqtl-a-ENSG00000005379	rs7025728	A	G	0.287386	TSPOAP1	TRUE	reported	igd	0.00169238249505605	39.9655543254921
30482803	6.47292e-11	0.0119295	31026	16	0.0779259	eqtl-a-ENSG00000005379	rs12716977	C	T	0.542883	TSPOAP1	TRUE	reported	igd	0.00137339832444473	42.6669082779115
56427656	1.14393e-39	0.0159552	31352	17	0.210291	eqtl-a-ENSG00000005379	rs12948345	T	C	0.164528	TSPOAP1	TRUE	reported	igd	0.0055102578869253	173.703737142687
57748369	5.2723e-14	0.012307	29001	20	0.0926115	eqtl-a-ENSG00000005379	rs259981	A	T	0.369389	TSPOAP1	TRUE	reported	igd	0.00194879109884647	56.6233401366943
83547862	1.39027e-18	0.0148606	31684	4	-0.130743	eqtl-a-ENSG00000005381	rs17005891	A	G	0.199218	MPO	TRUE	reported	igd	0.00243705038970726	77.3992563345184
61650831	3.0493e-13	0.0155185	31569	8	-0.113162	eqtl-a-ENSG00000005381	rs7846314	T	A	0.178349	MPO	TRUE	reported	igd	0.00168155090752468	53.1709271185817
6898998	1.41299e-08	0.0118966	31569	8	0.067476	eqtl-a-ENSG00000005381	rs12716641	C	T	0.483351	MPO	TRUE	reported	igd	0.00101800468324214	32.1681011134891
41216534	1.25271e-08	0.0127905	31569	13	0.0728089	eqtl-a-ENSG00000005381	rs4325427	T	C	0.315692	MPO	TRUE	reported	igd	0.00102538632743752	32.4015943500539
56357833	1e-200	0.0162906	31567	17	0.593632	eqtl-a-ENSG00000005381	rs2856857	A	G	0.142232	MPO	TRUE	reported	igd	0.0403675205931072	1327.80081423355
56027903	3.35112e-10	0.0147449	31224	17	0.0926217	eqtl-a-ENSG00000005381	rs2585830	G	T	0.795843	MPO	TRUE	reported	igd	0.00126213209676828	39.4560871192653
836149	1.28322e-17	0.014144	13932	19	-0.12086	eqtl-a-ENSG00000005381	rs57228624	C	T	0.228262	MPO	TRUE	reported	igd	0.00521359223749574	73.0059631913007
38552078	3.1408e-08	0.0125664	31684	20	0.069536	eqtl-a-ENSG00000005381	rs2224538	C	T	0.338244	MPO	TRUE	reported	igd	0.000965468581123667	30.6175358560605
32265903	4.71867e-09	0.0132977	31300	22	-0.077882	eqtl-a-ENSG00000005381	rs1012068	G	T	0.276034	MPO	TRUE	reported	igd	0.00109471508521683	34.2999414003895
32669955	1.8273e-08	0.0135867	29827	6	-0.0764577	eqtl-a-ENSG00000005471	rs9275406	T	G	0.25806	ABCB4	TRUE	reported	igd	0.00106058153900667	31.6654281694153
87079880	1.07895e-106	0.0156794	31569	7	-0.344006	eqtl-a-ENSG00000005471	rs45493392	G	A	0.16734	ABCB4	TRUE	reported	igd	0.0150189716026933	481.333003290072
87158115	6.33753e-10	0.0524946	9117	7	-0.324501	eqtl-a-ENSG00000005471	rs80351204	A	G	0.0129886	ABCB4	TRUE	reported	igd	0.00417382656857758	38.2038855651795
38053207	6.51929e-12	0.0118851	31569	17	-0.0816268	eqtl-a-ENSG00000005471	rs12453507	G	C	0.492239	ABCB4	TRUE	reported	igd	0.00149193744124029	47.1663584637912
103434253	9.61944e-10	0.0127359	31569	4	0.0778899	eqtl-a-ENSG00000005513	rs3774937	C	T	0.320593	SOX8	TRUE	reported	igd	0.00118339012922847	37.400335397094
133428601	4.32006e-10	0.0261485	30902	5	-0.163216	eqtl-a-ENSG00000005513	rs4388254	T	C	0.0546521	SOX8	TRUE	reported	igd	0.00125920980947407	38.9586402146707
1079479	1.96698e-29	0.0165221	23787	16	0.186115	eqtl-a-ENSG00000005513	rs443887	G	A	0.151587	SOX8	TRUE	reported	igd	0.00530618035578185	126.880751915613
1030154	4.25794e-61	0.0121425	31146	16	-0.200241	eqtl-a-ENSG00000005513	rs11863963	C	G	0.38048	SOX8	TRUE	reported	igd	0.00865589413434801	271.932990094025
56849749	1.4568e-16	0.0122208	31684	3	-0.100944	eqtl-a-ENSG00000005844	rs1354034	C	T	0.618137	ITGAL	TRUE	reported	igd	0.00214875818624239	68.2235527740492
144385777	2.04456e-12	0.0266112	25735	6	0.187114	eqtl-a-ENSG00000005844	rs149110519	T	C	0.0526158	ITGAL	TRUE	reported	igd	0.00191745832854056	49.4367480726622
30485393	7.94328e-150	0.0116715	31481	16	-0.304278	eqtl-a-ENSG00000005844	rs11574938	C	G	0.543664	ITGAL	TRUE	reported	igd	0.0211330844280768	679.610633609723
118153977	5.51188e-33	0.0128213	31355	1	0.153388	eqtl-a-ENSG00000005961	rs826415	G	T	0.308498	ITGA2B	TRUE	reported	igd	0.00454395402692542	143.116907253227
38050232	4.25011e-12	0.012609	31470	2	-0.0873612	eqtl-a-ENSG00000005961	rs4670221	G	C	0.332826	ITGA2B	TRUE	reported	igd	0.00152306061707465	48.0007795950952
56849749	1e-200	0.011269	31470	3	0.570761	eqtl-a-ENSG00000005961	rs1354034	C	T	0.618137	ITGA2B	TRUE	reported	igd	0.0753716920653065	2565.13496889237
88180196	7.2929e-12	0.0266851	29817	5	0.182841	eqtl-a-ENSG00000005961	rs114694170	C	T	0.0523176	ITGA2B	TRUE	reported	igd	0.00157203531395967	46.9440305595266
135419018	4.41977e-08	0.0134814	31355	6	0.073788	eqtl-a-ENSG00000005961	rs9399137	C	T	0.264393	ITGA2B	TRUE	reported	igd	0.0009545088247421	29.9553077877703
99192919	5.21075e-11	0.0139766	25947	9	0.0917561	eqtl-a-ENSG00000005961	rs10820606	C	A	0.236914	ITGA2B	TRUE	reported	igd	0.00165828390887221	43.0956408234096
65066186	1.3326e-52	0.0119574	31470	10	0.182517	eqtl-a-ENSG00000005961	rs10761741	T	G	0.420816	ITGA2B	TRUE	reported	igd	0.00734907932624172	232.972965039117
243268	6.63285e-50	0.0142098	31355	11	0.211064	eqtl-a-ENSG00000005961	rs505404	G	T	0.222031	ITGA2B	TRUE	reported	igd	0.0069871563069323	220.609746472686
54712308	3.82737e-60	0.0119883	31470	12	0.196102	eqtl-a-ENSG00000005961	rs10876550	A	G	0.590064	ITGA2B	TRUE	reported	igd	0.00843092203401822	267.560032338551
122216910	1.4171e-34	0.0189493	29817	12	0.232392	eqtl-a-ENSG00000005961	rs11553699	G	A	0.10963	ITGA2B	TRUE	reported	igd	0.00501888099932095	150.392740261287
57036023	4.8863e-08	0.0127721	31355	12	0.0696781	eqtl-a-ENSG00000005961	rs2950393	A	G	0.317506	ITGA2B	TRUE	reported	igd	0.000948307387486265	29.7605
88556880	2.45641e-16	0.0130431	19914	16	0.10692	eqtl-a-ENSG00000005961	rs10852622	G	A	0.293204	ITGA2B	TRUE	reported	igd	0.00336306087934173	67.191236448186
33884804	3.3266e-178	0.015097	31470	17	0.429713	eqtl-a-ENSG00000005961	rs10512472	C	T	0.179037	ITGA2B	TRUE	reported	igd	0.0250980438513854	810.11761124726
20720973	4.69894e-12	0.0118836	31086	18	0.0821669	eqtl-a-ENSG00000005961	rs11082304	T	G	0.50307	ITGA2B	TRUE	reported	igd	0.00153555549219593	47.8046135563171
1924707	7.51104e-13	0.0131712	31355	20	-0.0944323	eqtl-a-ENSG00000005961	rs13042885	T	C	0.284247	ITGA2B	TRUE	reported	igd	0.00163671191426876	51.399955567739
248039451	2.7477e-09	0.01257	31684	1	-0.0747402	eqtl-a-ENSG00000006007	rs3811444	T	C	0.337611	GDE1	TRUE	reported	igd	0.00111458610026799	35.3517193637138
50427982	6.21012e-15	0.0119389	31684	7	0.093121	eqtl-a-ENSG00000006007	rs6592965	A	G	0.449532	GDE1	TRUE	reported	igd	0.001916432528896	60.8329977161366
19477624	2.50207e-50	0.0319531	29715	16	0.476693	eqtl-a-ENSG00000006007	rs118174930	C	A	0.0354099	GDE1	TRUE	reported	igd	0.00743421501651913	222.547295229917
19589739	8.71766e-14	0.0398922	24117	16	0.29756	eqtl-a-ENSG00000006007	rs12929106	A	G	0.0226867	GDE1	TRUE	reported	igd	0.00230170188115485	55.6335928092737
19397568	1e-200	0.0259658	30958	16	-0.799882	eqtl-a-ENSG00000006007	rs35659432	A	G	0.051926	GDE1	TRUE	reported	igd	0.0297415082630264	948.899842290512
19444627	1e-200	0.0272274	30902	16	-0.966815	eqtl-a-ENSG00000006007	rs28576302	C	T	0.045979	GDE1	TRUE	reported	igd	0.0392030142146551	1260.80031177729
16170764	2.6947e-08	0.0118982	31569	17	-0.0661553	eqtl-a-ENSG00000006007	rs7210990	A	C	0.481977	GDE1	TRUE	reported	igd	0.000978319803588974	30.9128639068389
18972008	1.29351e-09	0.0224165	26196	19	-0.136026	eqtl-a-ENSG00000006015	rs10405364	G	A	0.0761021	REX1BD	TRUE	reported	igd	0.00140366422433691	36.8192625739225
18660566	1e-200	0.0111578	21129	19	-0.517569	eqtl-a-ENSG00000006015	rs10414427	C	T	0.555728	REX1BD	TRUE	reported	igd	0.0924237424795959	2151.48467270534
18810795	1.30527e-33	0.0226486	26079	19	0.273656	eqtl-a-ENSG00000006015	rs757348	T	A	0.0737959	REX1BD	TRUE	reported	igd	0.00556688015303212	145.980187961719
18979061	2.58571e-08	0.0356319	20235	19	0.198377	eqtl-a-ENSG00000006015	rs117558072	C	A	0.0286608	REX1BD	TRUE	reported	igd	0.00152945507085532	30.9928666456672
48574202	6.96627e-109	0.0124063	31676	17	-0.275025	eqtl-a-ENSG00000006282	rs11655670	A	G	0.333878	SPATA20	TRUE	reported	igd	0.015277189064375	491.396848992714
48305596	1.26386e-12	0.0132938	31555	17	-0.0943618	eqtl-a-ENSG00000006282	rs7220357	C	T	0.275793	SPATA20	TRUE	reported	igd	0.0015941642964533	50.3809816080909
48490945	1e-200	0.0128972	30077	17	-0.412784	eqtl-a-ENSG00000006282	rs144232687	T	C	0.273178	SPATA20	TRUE	reported	igd	0.0329363438097376	1024.2971429411
48617493	1e-200	0.0144966	31684	17	0.588087	eqtl-a-ENSG00000006282	rs62059698	G	A	0.185294	SPATA20	TRUE	reported	igd	0.0493764012388483	1645.59679150385
48702463	1.28588e-56	0.0126253	26121	17	-0.200178	eqtl-a-ENSG00000006282	rs2107440	A	G	0.32208	SPATA20	TRUE	reported	igd	0.00953234554179297	251.371493138039
48373667	3.86901e-31	0.0133225	26701	17	0.154614	eqtl-a-ENSG00000006282	rs11655373	A	G	0.271294	SPATA20	TRUE	reported	igd	0.0050189567549584	134.677064764573
48834023	1.10433e-16	0.0118755	31684	17	-0.0984851	eqtl-a-ENSG00000006282	rs3760403	G	A	0.493705	SPATA20	TRUE	reported	igd	0.00216598553539163	68.7717122662904
131656997	1.18839e-09	0.012641	31684	5	-0.0768826	eqtl-a-ENSG00000006530	rs270601	C	T	0.669999	AGK	TRUE	reported	igd	0.00116612878977565	36.988425585636
141343087	4.26776e-67	0.0119204	31567	7	0.20629	eqtl-a-ENSG00000006530	rs3779086	T	C	0.42326	AGK	TRUE	reported	igd	0.00939811026171568	299.46576266822
141583683	2.07922e-19	0.0433954	23222	7	-0.390945	eqtl-a-ENSG00000006530	rs73153906	T	G	0.0190665	AGK	TRUE	reported	igd	0.00348280461114911	81.1533643825643
182319301	1.22301e-09	0.0119574	31684	2	0.0726661	eqtl-a-ENSG00000006534	rs1449263	T	C	0.553798	ALDH3B1	TRUE	reported	igd	0.00116424468783145	36.9285941194086
144385777	8.7882e-23	0.0265671	25735	6	0.261024	eqtl-a-ENSG00000006534	rs149110519	T	C	0.0526158	ALDH3B1	TRUE	reported	igd	0.00373699409629564	96.5247816190322
113912553	2.24213e-08	0.0119087	31569	9	-0.0665947	eqtl-a-ENSG00000006534	rs10980797	G	A	0.472236	ALDH3B1	TRUE	reported	igd	0.000989600277038113	31.2696564059043
67793448	1.29718e-111	0.0139727	31683	11	-0.313679	eqtl-a-ENSG00000006534	rs2286164	G	A	0.226473	ALDH3B1	TRUE	reported	igd	0.0156577746505852	503.944609842482
67735589	1.29981e-10	0.0486885	8975	11	-0.312926	eqtl-a-ENSG00000006534	rs145506132	A	G	0.0151282	ALDH3B1	TRUE	reported	igd	0.00458143770178459	41.2984467591205
242159975	1e-200	0.0140146	30597	2	0.424463	eqtl-a-ENSG00000006607	rs73114178	G	A	0.216009	FARP2	TRUE	reported	igd	0.0291078682095967	917.254552501477
241921688	3.31467e-09	0.0168588	30594	2	-0.0997212	eqtl-a-ENSG00000006607	rs4303712	C	T	0.145495	FARP2	TRUE	reported	igd	0.00114232327111458	34.9859187390742
242087346	3.1798e-29	0.0121269	30598	2	0.136089	eqtl-a-ENSG00000006607	rs6726954	G	A	0.393906	FARP2	TRUE	reported	igd	0.00409892163471227	125.926770298824
30504160	1e-200	0.0143903	31470	7	0.473269	eqtl-a-ENSG00000006625	rs736781	T	C	0.198147	GGCT	TRUE	reported	igd	0.0332279659570352	1081.55552282919
30667433	2.14981e-17	0.0201572	31470	7	-0.171042	eqtl-a-ENSG00000006625	rs2709778	G	A	0.904055	GGCT	TRUE	reported	igd	0.00228273693695279	71.9975173241951
30436719	1.1766e-09	0.024729	25181	7	-0.150439	eqtl-a-ENSG00000006625	rs10279910	T	A	0.938435	GGCT	TRUE	reported	igd	0.00146756373279477	37.0060960324692
56849749	3.17322e-30	0.0121941	31684	3	0.139305	eqtl-a-ENSG00000006638	rs1354034	C	T	0.618137	TBXA2R	TRUE	reported	igd	0.00410212326724623	130.49879148178
106372903	6.04171e-09	0.0119729	31355	7	-0.0696284	eqtl-a-ENSG00000006638	rs342296	A	G	0.441001	TBXA2R	TRUE	reported	igd	0.0010774549745786	33.8178830643002
3622535	2.73275e-28	0.0120889	23991	19	-0.133344	eqtl-a-ENSG00000006638	rs4807492	A	G	0.598382	TBXA2R	TRUE	reported	igd	0.00504577796549581	121.657021934906
148200011	2.36265e-17	0.0120367	31569	5	-0.102005	eqtl-a-ENSG00000006652	rs56330463	C	T	0.582097	IFRD1	TRUE	reported	igd	0.00226976218817089	71.812580473785
144385777	3.7139e-10	0.0266207	25735	6	0.1668	eqtl-a-ENSG00000006652	rs149110519	T	C	0.0526158	IFRD1	TRUE	reported	igd	0.00152323510712111	39.2572069674078
112292570	8.73776e-20	0.0436754	27503	7	0.397603	eqtl-a-ENSG00000006652	rs1234378	C	A	0.981184	IFRD1	TRUE	reported	igd	0.00300426856062789	82.8693514730977
112092857	1e-200	0.0131216	31683	7	0.527231	eqtl-a-ENSG00000006652	rs6966318	C	T	0.755694	IFRD1	TRUE	reported	igd	0.0484860865537407	1614.36179377089
111872453	8.64172e-11	0.0476953	9002	7	-0.309495	eqtl-a-ENSG00000006652	rs76272652	G	A	0.0157743	IFRD1	TRUE	reported	igd	0.00465575806913146	42.097819886814
112721571	1.22659e-10	0.0372545	30294	7	-0.239767	eqtl-a-ENSG00000006652	rs56384744	A	C	0.0261311	IFRD1	TRUE	reported	igd	0.00136543588733664	41.418337984279
111909855	1e-200	0.0211258	29658	7	0.657218	eqtl-a-ENSG00000006652	rs76274372	C	A	0.0808079	IFRD1	TRUE	reported	igd	0.0316012971185902	967.750229900584
38775323	1.76604e-110	0.0158956	31355	7	-0.354999	eqtl-a-ENSG00000006715	rs757685	A	G	0.838511	VPS41	TRUE	reported	igd	0.0156581181949405	498.73828274554
38950137	5.30396e-22	0.0131283	31355	7	0.126587	eqtl-a-ENSG00000006715	rs10239557	T	C	0.285952	VPS41	TRUE	reported	igd	0.00295643652770678	92.9680084693375
39560862	9.9747e-26	0.0182159	31469	7	-0.191018	eqtl-a-ENSG00000006715	rs6963017	G	A	0.120434	VPS41	TRUE	reported	igd	0.0034821658600388	109.95619883954
12882087	1e-200	0.0116237	31228	17	0.357843	eqtl-a-ENSG00000006744	rs11650537	T	C	0.43431	ELAC2	TRUE	reported	igd	0.0294555757012822	947.694699820505
12851435	2.08689e-34	0.012843	31355	17	0.157101	eqtl-a-ENSG00000006744	rs7225631	A	G	0.306374	ELAC2	TRUE	reported	igd	0.00474952874701876	149.622611700756
13065700	9.70957e-14	0.0423005	26119	17	-0.314915	eqtl-a-ENSG00000006744	rs138142208	C	T	0.0201245	ELAC2	TRUE	reported	igd	0.00211747633055628	55.4194787596637
46042665	1.81001e-09	0.0335039	26236	19	0.201492	eqtl-a-ENSG00000007047	rs141651018	T	C	0.0325351	MARK4	TRUE	reported	igd	0.00137666723021402	36.1652756673175
46089055	3.67934e-09	0.0327765	26366	19	0.193322	eqtl-a-ENSG00000007047	rs73048457	C	T	0.0340519	MARK4	TRUE	reported	igd	0.00131771201705092	34.7859975445199
45758364	1e-200	0.0119822	28464	19	-0.413205	eqtl-a-ENSG00000007047	rs184688	G	A	0.649813	MARK4	TRUE	reported	igd	0.0401038729891126	1189.12494893646
45808793	7.41993e-28	0.020402	28473	19	-0.223196	eqtl-a-ENSG00000007047	rs17875633	C	T	0.0930441	MARK4	TRUE	reported	igd	0.00418574184667418	119.673177142149
41905677	1.43681e-26	0.022855	24423	19	-0.243815	eqtl-a-ENSG00000007129	rs73047262	T	C	0.0725341	CEACAM21	TRUE	reported	igd	0.00463810303856847	113.79490680792
41985624	1e-200	0.0135916	26605	19	0.423529	eqtl-a-ENSG00000007129	rs887391	T	C	0.765683	CEACAM21	TRUE	reported	igd	0.0352122403597773	970.940210353081
41781294	9.93825e-10	0.0474565	14710	19	-0.289978	eqtl-a-ENSG00000007129	rs112335177	T	C	0.0159415	CEACAM21	TRUE	reported	igd	0.00253177488476022	37.3318608728125
42237641	2.88602e-16	0.0123261	26483	19	0.100804	eqtl-a-ENSG00000007129	rs11881921	A	G	0.366027	CEACAM21	TRUE	reported	igd	0.00251907776989098	66.8761646842748
42066641	3.66353e-16	0.0317064	20579	19	0.258388	eqtl-a-ENSG00000007129	rs4803482	A	G	0.0363963	CEACAM21	TRUE	reported	igd	0.00321682358648591	66.4061959565624
2461453	2.91407e-12	0.012528	25827	17	-0.0874664	eqtl-a-ENSG00000007168	rs8076127	G	T	0.341639	PAFAH1B1	TRUE	reported	igd	0.00188376261045127	48.739983974349
2491429	1.8906e-25	0.0412942	21583	17	-0.430525	eqtl-a-ENSG00000007168	rs115107247	A	G	0.0210582	PAFAH1B1	TRUE	reported	igd	0.00501100807179955	108.687197622092
2307902	4.18167e-08	0.0251964	26157	17	-0.138147	eqtl-a-ENSG00000007168	rs66494490	T	C	0.0591811	PAFAH1B1	TRUE	reported	igd	0.00114793993653492	30.0588748229274
2599272	4.39845e-62	0.0121018	26071	17	-0.201224	eqtl-a-ENSG00000007168	rs11654991	A	G	0.613018	PAFAH1B1	TRUE	reported	igd	0.0104935049710969	276.456175341763
160754947	1.26771e-10	0.0179014	31240	2	-0.115124	eqtl-a-ENSG00000007237	rs76840964	G	A	0.126123	GAS7	TRUE	reported	igd	0.00132212388702919	41.3551826578624
182323766	2.03002e-18	0.0119731	31569	2	0.104832	eqtl-a-ENSG00000007237	rs1375493	A	G	0.565077	GAS7	TRUE	reported	igd	0.00242248084517784	76.6561508969419
128297569	5.35945e-10	0.0121699	31569	3	-0.0755519	eqtl-a-ENSG00000007237	rs9880192	C	G	0.392874	GAS7	TRUE	reported	igd	0.00121934347741747	38.5380066186403
148200011	1.09219e-11	0.0120476	31569	5	0.0818477	eqtl-a-ENSG00000007237	rs56330463	C	T	0.582097	GAS7	TRUE	reported	igd	0.00145987803623361	46.1513453051399
144385777	5.42126e-10	0.0266214	25735	6	0.165229	eqtl-a-ENSG00000007237	rs149110519	T	C	0.0526158	GAS7	TRUE	reported	igd	0.00149464135413043	38.5191783226865
42515791	1.69785e-19	0.0145769	27823	6	0.131649	eqtl-a-ENSG00000007237	rs16895831	T	C	0.209742	GAS7	TRUE	reported	igd	0.00292300474745155	81.5593133389383
127009395	2.8622e-20	0.0158031	31569	9	-0.145767	eqtl-a-ENSG00000007237	rs55793580	T	C	0.169838	GAS7	TRUE	reported	igd	0.0026878445145425	85.075858470072
111884608	2.80841e-10	0.011929	28418	12	0.0752626	eqtl-a-ENSG00000007237	rs3184504	C	T	0.542056	GAS7	TRUE	reported	igd	0.00139877847437437	39.803365218297
9942454	1.28027e-74	0.0380215	27325	17	0.694889	eqtl-a-ENSG00000007237	rs9905556	T	C	0.0245393	GAS7	TRUE	reported	igd	0.0120763472871558	333.995482364332
10018742	1.84927e-159	0.0125347	31684	17	-0.337262	eqtl-a-ENSG00000007237	rs11078832	G	A	0.688526	GAS7	TRUE	reported	igd	0.0223385721541104	723.901570450507
9912102	2.88735e-35	0.021455	31226	17	0.265873	eqtl-a-ENSG00000007237	rs58209168	A	T	0.0830179	GAS7	TRUE	reported	igd	0.00489378087440356	153.554877947246
10075853	2.13599e-16	0.0124404	31684	17	0.102188	eqtl-a-ENSG00000007237	rs12936206	G	A	0.35099	GAS7	TRUE	reported	igd	0.00212504058821239	67.4689100881246
31265490	3.53069e-09	0.013792	30389	6	0.081439	eqtl-a-ENSG00000007264	rs2247056	C	T	0.753447	MATK	TRUE	reported	igd	0.00114602992636384	34.8643669803411
94450233	6.31481e-09	0.0120121	31270	10	0.0697712	eqtl-a-ENSG00000007264	rs9420589	T	G	0.428682	MATK	TRUE	reported	igd	0.00107775069639218	33.7354671980566
3812089	1.40961e-32	0.0284855	17628	19	0.338555	eqtl-a-ENSG00000007264	rs8109446	G	A	0.954727	MATK	TRUE	reported	igd	0.00794953078271853	141.24123109054
3762926	1.7346e-28	0.0122821	23655	19	-0.135977	eqtl-a-ENSG00000007264	rs7245624	A	G	0.631132	MATK	TRUE	reported	igd	0.0051548754444828	122.560050684098
3823192	3.80452e-15	0.0131434	31017	19	-0.103322	eqtl-a-ENSG00000007264	rs34503630	C	T	0.2859	MATK	TRUE	reported	igd	0.00198841006468752	61.7934087922573
16442019	6.80769e-09	0.0126582	22490	19	0.0733618	eqtl-a-ENSG00000007264	rs55908509	A	G	0.3284	MATK	TRUE	reported	igd	0.00149127747563291	33.5859338186348
31237858	1.34586e-14	0.0128365	27280	6	-0.0988592	eqtl-a-ENSG00000007312	rs34794906	C	T	0.310471	CD79B	TRUE	reported	igd	0.00216946853347516	59.307428255537
130613614	9.09913e-11	0.0120219	31355	8	0.0779137	eqtl-a-ENSG00000007312	rs10098310	A	G	0.575007	CD79B	TRUE	reported	igd	0.00133780630794847	42.0004296127809
112007756	5.98605e-10	0.0119256	28204	12	0.07383	eqtl-a-ENSG00000007312	rs653178	T	C	0.539991	CD79B	TRUE	reported	igd	0.00135707791290893	38.3243203885842
86009760	1.1485e-08	0.014584	31470	16	0.0832351	eqtl-a-ENSG00000007312	rs12232384	A	C	0.210455	CD79B	TRUE	reported	igd	0.00103398364972611	32.5710754490495
38051348	3.07114e-18	0.0118718	31086	17	-0.103389	eqtl-a-ENSG00000007312	rs8067378	G	A	0.497388	CD79B	TRUE	reported	igd	0.00243384205493041	75.8381244521155
62006432	6.34454e-40	0.0122729	31374	17	-0.162302	eqtl-a-ENSG00000007312	rs12603821	A	G	0.366952	CD79B	TRUE	reported	igd	0.00554331211967916	174.874169924134
44747947	8.46447e-13	0.0136628	31086	20	-0.0977354	eqtl-a-ENSG00000007312	rs4810485	G	T	0.746826	CD79B	TRUE	reported	igd	0.00164340731163259	51.1677623495526
113501607	4.42629e-10	0.04413	21876	1	0.275296	eqtl-a-ENSG00000007341	rs147836155	T	C	0.018481	ST7L	TRUE	reported	igd	0.00177579214473347	38.9127783800769
113044731	1e-200	0.0116818	30901	1	-0.384084	eqtl-a-ENSG00000007341	rs351362	T	C	0.405735	ST7L	TRUE	reported	igd	0.0338008044273016	1080.94796682183
113254267	5.83579e-34	0.0145752	24642	1	-0.177072	eqtl-a-ENSG00000007341	rs7522283	C	G	0.791511	ST7L	TRUE	reported	igd	0.00595389694697622	147.582713038078
113307702	1.51649e-09	0.0371123	26273	1	-0.224247	eqtl-a-ENSG00000007341	rs184305120	C	T	0.0263468	ST7L	TRUE	reported	igd	0.0013877293561505	36.5077007234493
111833788	2.74448e-08	0.011926	28089	12	0.0662741	eqtl-a-ENSG00000007516	rs10774624	A	G	0.538565	BAIAP3	TRUE	reported	igd	0.00109820794583078	30.8792784434972
1224109	3.71689e-08	0.0132245	19733	16	0.0727861	eqtl-a-ENSG00000007516	rs4318204	C	T	0.281178	BAIAP3	TRUE	reported	igd	0.00153277735066079	30.2896572064133
1378788	4.40453e-17	0.0120148	19734	16	-0.100945	eqtl-a-ENSG00000007516	rs8048759	T	C	0.576369	BAIAP3	TRUE	reported	igd	0.00356427086604644	70.5817652584131
1374818	1e-200	0.0128811	23991	16	-0.42967	eqtl-a-ENSG00000007516	rs8063	G	A	0.728272	BAIAP3	TRUE	reported	igd	0.0443227849909047	1112.57155915001
627359	1.56939e-08	0.0436197	17064	16	0.246621	eqtl-a-ENSG00000007541	rs148117344	C	T	0.018934	PIGQ	TRUE	reported	igd	0.00186982560486898	31.9627291997337
673430	1.84077e-195	0.0125065	23849	16	0.373011	eqtl-a-ENSG00000007541	rs12444525	A	G	0.307766	PIGQ	TRUE	reported	igd	0.035958156202539	889.478145040043
33875262	3.58344e-28	0.0128635	31185	17	0.141573	eqtl-a-ENSG00000007541	rs8073060	A	T	0.305723	PIGQ	TRUE	reported	igd	0.00386912908728846	121.11968000587
27730940	1.22011e-23	0.0121658	31300	2	0.121926	eqtl-a-ENSG00000007944	rs1260326	C	T	0.611153	MYLIP	TRUE	reported	igd	0.00319871508803493	100.434646644902
16138363	1.12279e-32	0.012757	31556	6	-0.151864	eqtl-a-ENSG00000007944	rs2142675	G	C	0.314263	MYLIP	TRUE	reported	igd	0.00447079356051615	141.704953602586
15900330	1.69824e-116	0.0200996	31684	6	-0.461163	eqtl-a-ENSG00000007944	rs2021900	T	C	0.90678	MYLIP	TRUE	reported	igd	0.01634322149485	526.388832684823
19845376	6.85662e-09	0.0184241	31684	8	0.106758	eqtl-a-ENSG00000007944	rs7841189	T	C	0.118043	MYLIP	TRUE	reported	igd	0.00105859126349648	33.5738293725515
116648917	1.0501e-09	0.0167392	31300	11	0.102136	eqtl-a-ENSG00000007944	rs964184	C	G	0.852011	MYLIP	TRUE	reported	igd	0.00118803078517123	37.2272145912698
111708458	1.66621e-09	0.0120359	31240	12	0.0725461	eqtl-a-ENSG00000007944	rs1265564	C	A	0.421923	MYLIP	TRUE	reported	igd	0.00116159626146889	36.328142650454
56990716	9.36936e-10	0.0127775	31569	16	0.0781973	eqtl-a-ENSG00000007944	rs247617	A	C	0.316679	MYLIP	TRUE	reported	igd	0.00118499350586427	37.451069273494
23737013	7.02587e-14	0.0223143	30547	1	0.167078	eqtl-a-ENSG00000007968	rs114352248	T	C	0.0767509	E2F2	TRUE	reported	igd	0.00183192256558836	56.0587700918268
205244953	5.25896e-11	0.0122231	31684	1	0.0802265	eqtl-a-ENSG00000007968	rs1172130	A	G	0.383273	E2F2	TRUE	reported	igd	0.00135782206595246	43.0770096076863
118153011	9.05191e-09	0.0156988	31569	1	0.0902321	eqtl-a-ENSG00000007968	rs11587735	C	A	0.173499	E2F2	TRUE	reported	igd	0.0010453799140135	33.0340408684668
56849749	1.09711e-09	0.0122343	31684	3	-0.0745629	eqtl-a-ENSG00000007968	rs1354034	C	T	0.618137	E2F2	TRUE	reported	igd	0.00117095037590018	37.1415407103259
30128442	1.68729e-10	0.0235851	26412	6	-0.150645	eqtl-a-ENSG00000007968	rs12212092	T	C	0.068141	E2F2	TRUE	reported	igd	0.00154227703371896	40.7944528081871
50427982	6.15744e-33	0.0119045	31684	7	0.142312	eqtl-a-ENSG00000007968	rs6592965	A	G	0.449532	E2F2	TRUE	reported	igd	0.00449020591847421	142.900355933063
33875262	9.1791e-23	0.0128747	31185	17	0.126438	eqtl-a-ENSG00000007968	rs8073060	A	T	0.305723	E2F2	TRUE	reported	igd	0.00308314669265426	96.4390992067999
27179590	4.84641e-10	0.0144505	27324	17	0.0899397	eqtl-a-ENSG00000007968	rs35033748	C	T	0.215702	E2F2	TRUE	reported	igd	0.00141572065587193	38.7351579229127
43831259	4.4157e-12	0.0135605	31569	18	-0.0938822	eqtl-a-ENSG00000007968	rs9944715	G	A	0.740866	E2F2	TRUE	reported	igd	0.00151598673373943	47.927811149833
4505445	2.10882e-09	0.0118919	24632	19	-0.0712206	eqtl-a-ENSG00000007968	rs16989695	A	G	0.487856	E2F2	TRUE	reported	igd	0.00145404263501881	35.8652196590119
55966904	6.25461e-18	0.0157011	27738	20	-0.135463	eqtl-a-ENSG00000007968	rs117963839	T	C	0.172794	E2F2	TRUE	reported	igd	0.00267634561028689	74.4303231154594
37462936	6.02726e-09	0.0119712	27015	22	0.0696246	eqtl-a-ENSG00000007968	rs855791	G	A	0.558409	E2F2	TRUE	reported	igd	0.00125055165061625	33.8234497089598
171016449	2.11544e-15	0.012853	1575	6	0.101983	eqtl-a-ENSG00000008018	rs4554352	C	A	0.691111	PSMB1	TRUE	reported	igd	0.0384365109569178	62.8774203931143
170764103	1e-200	0.0115066	31559	6	-0.362156	eqtl-a-ENSG00000008018	rs10946271	C	T	0.498471	PSMB1	TRUE	reported	igd	0.0304334866955579	990.534972560631
170804451	9.87643e-43	0.0123765	25240	6	-0.169583	eqtl-a-ENSG00000008018	rs9366235	T	C	0.352418	PSMB1	TRUE	reported	igd	0.00738347967637033	187.730363394999
15525604	1.69863e-14	0.0462188	23532	6	-0.354568	eqtl-a-ENSG00000008083	rs115972027	T	G	0.0167958	JARID2	TRUE	reported	igd	0.00249469879356971	58.8470683230459
15252083	5.26017e-169	0.0206928	31559	6	-0.573402	eqtl-a-ENSG00000008083	rs148916699	T	C	0.0858254	JARID2	TRUE	reported	igd	0.0237528876866023	767.807522574757
14959424	6.53281e-11	0.0312795	30740	6	-0.20428	eqtl-a-ENSG00000008083	rs114822866	T	G	0.0375024	JARID2	TRUE	reported	igd	0.0013855623422756	42.6485074427344
15769837	3.80654e-08	0.0430065	27367	6	0.236527	eqtl-a-ENSG00000008083	rs116666415	C	T	0.0194913	JARID2	TRUE	reported	igd	0.0011040438174799	30.2455514794545
144385777	5.73311e-10	0.0266215	25735	6	-0.164987	eqtl-a-ENSG00000008083	rs149110519	T	C	0.0526158	JARID2	TRUE	reported	igd	0.00149026169611439	38.4061394245917
15131245	1e-200	0.0278884	30929	6	-0.919173	eqtl-a-ENSG00000008083	rs112441779	T	C	0.0442485	JARID2	TRUE	reported	igd	0.0339304662618688	1086.22360340914
28724374	8.35026e-12	0.0131057	31355	7	0.0895459	eqtl-a-ENSG00000008083	rs56388170	T	G	0.289189	JARID2	TRUE	reported	igd	0.00148668179572771	46.6813346318482
46298373	2.42885e-14	0.0212421	31355	3	-0.16198	eqtl-a-ENSG00000008256	rs13325613	T	G	0.0854911	CYTH3	TRUE	reported	igd	0.0018510427270259	58.1433684797923
28303030	4.24033e-14	0.0154746	31355	3	0.116886	eqtl-a-ENSG00000008256	rs4502545	A	G	0.179583	CYTH3	TRUE	reported	igd	0.00181630924854851	57.0503649752792
31272261	1.59919e-10	0.0137996	30389	6	0.0882553	eqtl-a-ENSG00000008256	rs6457374	T	C	0.754006	CYTH3	TRUE	reported	igd	0.00134415092734548	40.8996895849308
6130519	1.24022e-16	0.0118844	31349	7	0.0983948	eqtl-a-ENSG00000008256	rs852162	T	C	0.479764	CYTH3	TRUE	reported	igd	0.00218181285845974	68.5428
6254944	9.2918e-57	0.0330382	29413	7	-0.524508	eqtl-a-ENSG00000008256	rs6958932	G	A	0.0329708	CYTH3	TRUE	reported	igd	0.00849623511586826	252.024026375738
46298373	1.29751e-08	0.0212615	31355	3	-0.120899	eqtl-a-ENSG00000008283	rs13325613	T	G	0.0854911	CYB561	TRUE	reported	igd	0.00103015645651269	32.3318021958252
35879156	4.0785e-11	0.0134304	31355	5	-0.0886551	eqtl-a-ENSG00000008283	rs6881706	T	G	0.267155	CYB561	TRUE	reported	igd	0.00138777680797124	43.571433685481
31350704	1.22149e-09	0.0140613	30773	6	0.0854549	eqtl-a-ENSG00000008283	rs1521	T	C	0.767038	CYB561	TRUE	reported	igd	0.0011987599597352	36.9313145020972
61518766	1.10561e-50	0.0118109	31352	17	-0.176842	eqtl-a-ENSG00000008283	rs4968775	C	G	0.505945	CYB561	TRUE	reported	igd	0.0070997851274766	224.169821309756
30529631	2.18852e-08	0.0119173	30492	22	-0.0666941	eqtl-a-ENSG00000008283	rs2412973	A	C	0.466354	CYB561	TRUE	reported	igd	0.00102609440923947	31.3177535094975
50370254	4.98425e-11	0.0166562	29863	7	0.109456	eqtl-a-ENSG00000008294	rs149007767	T	C	0.149708	SPAG9	TRUE	reported	igd	0.00144399697934147	43.1815478247377
28724374	2.23254e-17	0.013094	31141	7	0.111053	eqtl-a-ENSG00000008294	rs56388170	T	G	0.289189	SPAG9	TRUE	reported	igd	0.002304524689002	71.9263503409839
49039468	2.39718e-19	0.049823	15425	17	-0.448073	eqtl-a-ENSG00000008294	rs1006702	G	T	0.0143961	SPAG9	TRUE	reported	igd	0.00521604584994832	80.8688909869754
49043348	1.75106e-61	0.0213563	31355	17	0.353333	eqtl-a-ENSG00000008294	rs8125	T	C	0.0830943	SPAG9	TRUE	reported	igd	0.00865435436511403	273.708744880446
49246345	1.49899e-11	0.023819	31352	17	0.160735	eqtl-a-ENSG00000008294	rs41456547	G	T	0.066683	SPAG9	TRUE	reported	igd	0.00145036818865488	45.535085353595
48689192	6.86436e-85	0.018554	28168	3	-0.362248	eqtl-a-ENSG00000008300	rs2286652	A	G	0.112952	CELSR3	TRUE	reported	igd	0.0133519027014451	381.158887873581
149289464	1.21171e-14	0.0137132	30935	7	0.105794	eqtl-a-ENSG00000008300	rs354033	A	G	0.25016	CELSR3	TRUE	reported	igd	0.00192025796895898	59.5136212592929
46262286	1.3808e-10	0.0125226	30935	19	-0.0803688	eqtl-a-ENSG00000008300	rs725660	A	C	0.342629	CELSR3	TRUE	reported	igd	0.00132971313590249	41.1867830393047
182323766	2.91561e-10	0.0119888	31569	2	0.0755663	eqtl-a-ENSG00000008394	rs1375493	A	G	0.565077	MGST1	TRUE	reported	igd	0.00125689169359799	39.7262316624023
128297569	6.01645e-10	0.01217	31569	3	-0.075331	eqtl-a-ENSG00000008394	rs9880192	C	G	0.392874	MGST1	TRUE	reported	igd	0.00121221235808298	38.3123502119995
130613614	1.37151e-14	0.0120145	31569	8	-0.0925011	eqtl-a-ENSG00000008394	rs10098310	A	G	0.575007	MGST1	TRUE	reported	igd	0.00187416086317003	59.2727225846101
16502260	1.71002e-135	0.0231522	31676	12	-0.57357	eqtl-a-ENSG00000008394	rs4149190	A	T	0.0679486	MGST1	TRUE	reported	igd	0.019007443265647	613.706754310401
54685880	4.53002e-19	0.0255771	29836	12	-0.228224	eqtl-a-ENSG00000008394	rs35979828	T	C	0.0571059	MGST1	TRUE	reported	igd	0.00266147272861802	79.6142685902518
23589349	2.09604e-18	0.0118801	31569	14	0.103973	eqtl-a-ENSG00000008394	rs2239630	G	A	0.519173	MGST1	TRUE	reported	igd	0.00242040304519946	76.5902421832242
86014881	2.10189e-08	0.0146491	31569	16	0.0820861	eqtl-a-ENSG00000008394	rs11641016	G	C	0.207945	MGST1	TRUE	reported	igd	0.000993630215561925	31.3971221438871
30717737	1.06979e-25	0.0118581	31684	21	-0.124268	eqtl-a-ENSG00000008394	rs372883	C	T	0.494776	MGST1	TRUE	reported	igd	0.00345418556865317	109.814827980103
144385777	6.72822e-42	0.0264857	25735	6	0.359205	eqtl-a-ENSG00000008438	rs149110519	T	C	0.0526158	PGLYRP1	TRUE	reported	igd	0.00709650806867329	183.919629264231
148869277	5.48984e-09	0.0123778	31185	7	-0.0721836	eqtl-a-ENSG00000008438	rs4727027	A	G	0.639097	PGLYRP1	TRUE	reported	igd	0.00108935904675424	34.0065284743796
28724374	1.68112e-45	0.0130351	31355	7	-0.184542	eqtl-a-ENSG00000008438	rs56388170	T	G	0.289189	PGLYRP1	TRUE	reported	igd	0.00635166545301657	200.416747077044
61650831	8.76799e-24	0.0154923	31569	8	-0.155767	eqtl-a-ENSG00000008438	rs7846314	T	A	0.178349	PGLYRP1	TRUE	reported	igd	0.00319205071232234	101.086136911213
959111	1.78649e-16	0.0145435	31569	10	-0.119773	eqtl-a-ENSG00000008438	rs12264390	C	T	0.21134	PGLYRP1	TRUE	reported	igd	0.00214381405368726	67.8191699223346
46509579	1e-200	0.0115036	31684	19	0.36371	eqtl-a-ENSG00000008438	rs8102495	G	A	0.495678	PGLYRP1	TRUE	reported	igd	0.0305852857456165	999.575319772117
46645202	4.42486e-19	0.0118831	31300	19	0.106064	eqtl-a-ENSG00000008438	rs12151345	T	C	0.47653	PGLYRP1	TRUE	reported	igd	0.00253879815511063	79.661549252929
50427982	2.43557e-13	0.0119419	30935	7	0.0874437	eqtl-a-ENSG00000008441	rs6592965	A	G	0.449532	NFIX	TRUE	reported	igd	0.0017302465152745	53.6144817271627
13098993	3.7792e-12	0.031239	29081	19	-0.216961	eqtl-a-ENSG00000008441	rs11881865	C	G	0.0375884	NFIX	TRUE	reported	igd	0.00165592251481995	48.2324399917763
13198701	2.94713e-13	0.0484738	17505	19	0.353709	eqtl-a-ENSG00000008441	rs8103751	A	G	0.0152515	NFIX	TRUE	reported	igd	0.00303247329583305	53.2388254133334
134905738	3.5678e-16	0.0315262	29498	8	-0.257011	eqtl-a-ENSG00000008513	rs16905012	A	G	0.03683	ST3GAL1	TRUE	reported	igd	0.00224796849074471	66.4554684020113
134552618	2.07014e-185	0.0148212	31563	8	-0.430404	eqtl-a-ENSG00000008513	rs59413766	A	C	0.187217	ST3GAL1	TRUE	reported	igd	0.0260229373459946	843.253868154693
134477013	2.1424e-20	0.0348689	31239	8	0.322711	eqtl-a-ENSG00000008513	rs115758847	C	G	0.0298502	ST3GAL1	TRUE	reported	igd	0.00273441704314809	85.6491857701184
134503142	1.1695e-44	0.0272355	31238	8	0.381853	eqtl-a-ENSG00000008513	rs760328	A	G	0.950445	ST3GAL1	TRUE	reported	igd	0.00625337044561196	196.559438220912
33875262	3.25537e-36	0.0128469	31185	17	0.161433	eqtl-a-ENSG00000008513	rs8073060	A	T	0.305723	ST3GAL1	TRUE	reported	igd	0.00503789070698974	157.891988497621
42515791	1.87672e-08	0.0146026	27074	6	0.0821121	eqtl-a-ENSG00000008516	rs16895831	T	C	0.209742	MMP25	TRUE	reported	igd	0.00116652648676627	31.6170872194124
50370254	2.94036e-15	0.0166449	29328	7	0.131387	eqtl-a-ENSG00000008516	rs149007767	T	C	0.149708	MMP25	TRUE	reported	igd	0.00212001179746791	62.3035502340643
142337790	4.69743e-08	0.0124656	24194	8	-0.068091	eqtl-a-ENSG00000008516	rs6986779	T	C	0.349935	MMP25	TRUE	reported	igd	0.00123171468085056	29.8343890140797
3307475	8.28514e-49	0.0387367	23722	16	0.568779	eqtl-a-ENSG00000008516	rs11466011	T	C	0.0238193	MMP25	TRUE	reported	igd	0.00900660927951244	215.578402550913
3065596	1e-200	0.011829	23101	16	0.411506	eqtl-a-ENSG00000008516	rs2257295	C	T	0.370253	MMP25	TRUE	reported	igd	0.0497794308979013	1210.09280550216
3132026	1.20976e-43	0.0274381	22204	16	0.380119	eqtl-a-ENSG00000008516	rs2472684	C	A	0.048803	MMP25	TRUE	reported	igd	0.00856963029878365	191.907508291211
38156712	1.07409e-08	0.0122467	30436	17	0.0700352	eqtl-a-ENSG00000008516	rs4794822	T	C	0.380161	MMP25	TRUE	reported	igd	0.00107334815177954	32.7013776144816
94485211	4.39491e-09	0.011889	28533	10	-0.069773	eqtl-a-ENSG00000008517	rs2497306	C	A	0.500343	IL32	TRUE	reported	igd	0.001205626512381	34.4392508986923
3018953	1.99756e-19	0.0120407	21968	16	0.108529	eqtl-a-ENSG00000008517	rs4786364	G	C	0.415946	IL32	TRUE	reported	igd	0.0036846347127371	81.2360111265041
3122405	1e-200	0.0230005	23178	16	0.755508	eqtl-a-ENSG00000008517	rs56235931	C	G	0.0666464	IL32	TRUE	reported	igd	0.0444802569126266	1078.86251609641
3084029	1e-200	0.013551	24184	16	-0.429006	eqtl-a-ENSG00000008517	rs12448662	G	A	0.235646	IL32	TRUE	reported	igd	0.0397942399685997	1002.18552207936
3222361	3.34965e-12	0.0196695	28135	16	0.136945	eqtl-a-ENSG00000008517	rs224197	G	A	0.10156	IL32	TRUE	reported	igd	0.00171993169883185	48.4702039234132
157101437	2.28139e-15	0.0221014	31012	7	0.175154	eqtl-a-ENSG00000009335	rs73494997	G	A	0.0783335	UBE3C	TRUE	reported	igd	0.0020211201195152	62.8018650190996
156931122	1e-200	0.0156418	31465	7	-0.486225	eqtl-a-ENSG00000009335	rs10949635	T	G	0.16163	UBE3C	TRUE	reported	igd	0.0297945670490704	966.214402875142
156638317	8.86115e-09	0.0251445	31355	7	-0.144608	eqtl-a-ENSG00000009335	rs10479648	C	T	0.0594286	UBE3C	TRUE	reported	igd	0.00105374117578995	33.072797252806
156851702	9.72076e-18	0.0222406	31026	7	0.190762	eqtl-a-ENSG00000009335	rs28712444	G	A	0.0772024	UBE3C	TRUE	reported	igd	0.00236557311023157	73.5635601516118
210036699	9.68278e-45	0.0143362	31684	1	-0.20119	eqtl-a-ENSG00000009790	rs724286	C	T	0.217126	TRAF3IP3	TRUE	reported	igd	0.00617751053611744	196.932441034668
209880259	1e-200	0.0143071	31300	1	-0.454581	eqtl-a-ENSG00000009790	rs12086634	G	T	0.202517	TRAF3IP3	TRUE	reported	igd	0.0312455871605339	1009.46573660918
210512326	1.02424e-14	0.0130117	31555	1	-0.10066	eqtl-a-ENSG00000009790	rs766176	C	T	0.295903	TRAF3IP3	TRUE	reported	igd	0.00189301771531924	59.8436731048053
77609298	1.35613e-15	0.0199708	30165	14	-0.159555	eqtl-a-ENSG00000009830	rs12889974	G	C	0.0980271	POMT2	TRUE	reported	igd	0.00211158497378073	63.8265126692294
77726516	3.7222e-20	0.0139009	30279	14	0.127831	eqtl-a-ENSG00000009830	rs369901	G	A	0.239664	POMT2	TRUE	reported	igd	0.00278505505651823	84.558612337064
77787695	1.66686e-100	0.0202325	30817	14	0.430591	eqtl-a-ENSG00000009830	rs8177537	T	G	0.0923782	POMT2	TRUE	reported	igd	0.0144845128491351	452.90030371463
36360987	1e-200	0.0143978	31313	6	0.488714	eqtl-a-ENSG00000010030	rs6906529	G	A	0.803337	ETV7	TRUE	reported	igd	0.0354894754653035	1152.0983317732
36735066	1.04841e-10	0.016294	31430	6	0.105256	eqtl-a-ENSG00000010030	rs236427	C	T	0.842008	ETV7	TRUE	reported	igd	0.00132592114356314	41.726375583533
36345180	1e-200	0.0113692	29823	6	0.436349	eqtl-a-ENSG00000010030	rs6928048	A	G	0.542997	ETV7	TRUE	reported	igd	0.0470672765491746	1472.91956654626
111865049	2.31473e-15	0.0119106	28164	12	-0.094369	eqtl-a-ENSG00000010030	rs7310615	G	C	0.537476	ETV7	TRUE	reported	igd	0.00222397629865222	62.7712222331277
171969728	2.41379e-15	0.0462223	21753	1	-0.365979	eqtl-a-ENSG00000010165	rs75310447	A	G	0.0167886	METTL13	TRUE	reported	igd	0.00287369216028913	62.6858179219725
172295812	1.17842e-13	0.0118845	31352	1	-0.0881745	eqtl-a-ENSG00000010165	rs2224567	G	A	0.486826	METTL13	TRUE	reported	igd	0.00175265765282216	55.0422877027459
171601895	1e-200	0.0115051	31354	1	0.369482	eqtl-a-ENSG00000010165	rs10798524	T	C	0.475352	METTL13	TRUE	reported	igd	0.0318461686280261	1031.28350730274
171897604	3.17395e-36	0.0123107	31354	1	-0.154721	eqtl-a-ENSG00000010165	rs7530758	C	T	0.6373	METTL13	TRUE	reported	igd	0.00501253808430939	157.944798336146
4569057	2.71769e-19	0.0168575	30599	12	-0.151373	eqtl-a-ENSG00000010219	rs10849072	A	T	0.144958	DYRK4	TRUE	reported	igd	0.00262821170719571	80.6272992167882
4917330	3.20752e-10	0.0307065	30264	12	0.193095	eqtl-a-ENSG00000010219	rs113449636	C	T	0.0389836	DYRK4	TRUE	reported	igd	0.00130493235290521	39.5414617963967
4706341	3.5156e-139	0.0117027	30721	12	0.2939	eqtl-a-ENSG00000010219	rs4766260	G	A	0.450919	DYRK4	TRUE	reported	igd	0.0201171219652839	630.66503508153
38329013	7.10395e-23	0.0130611	31469	7	-0.128604	eqtl-a-ENSG00000010270	rs2240832	C	T	0.290796	STARD3NL	TRUE	reported	igd	0.00307135894765293	96.944202449411
38373879	4.26432e-09	0.0139405	30180	7	0.0818823	eqtl-a-ENSG00000010270	rs9785016	A	G	0.238911	STARD3NL	TRUE	reported	igd	0.00114184708629615	34.4980528713994
50370254	2.18927e-11	0.0166552	29863	7	-0.111468	eqtl-a-ENSG00000010270	rs149007767	T	C	0.149708	STARD3NL	TRUE	reported	igd	0.00149767079673126	44.7890268787624
38220959	9.39723e-118	0.0137107	31355	7	-0.316295	eqtl-a-ENSG00000010270	rs9638935	C	A	0.23845	STARD3NL	TRUE	reported	igd	0.0166897245517766	532.154444977529
56849749	3.52371e-121	0.0120193	31470	3	0.28135	eqtl-a-ENSG00000010278	rs1354034	C	T	0.618137	CD9	TRUE	reported	igd	0.0171136269005457	547.908309694188
243268	3.95549e-19	0.0142801	31355	11	0.12764	eqtl-a-ENSG00000010278	rs505404	G	T	0.222031	CD9	TRUE	reported	igd	0.00254155259364103	79.8883388833176
6085513	2.42103e-12	0.0135937	31132	12	0.0952619	eqtl-a-ENSG00000010278	rs216855	G	A	0.742834	CD9	TRUE	reported	igd	0.00157496735159478	49.1060741186474
6205767	1e-200	0.0341255	24164	12	1.07694	eqtl-a-ENSG00000010278	rs36007563	C	T	0.0292701	CD9	TRUE	reported	igd	0.0395836367951326	995.838751697714
122216910	1.46649e-09	0.0190253	29817	12	0.115067	eqtl-a-ENSG00000010278	rs11553699	G	A	0.10963	CD9	TRUE	reported	igd	0.00122529917540238	36.5771
6241446	1e-200	0.0113585	30558	12	-0.58403	eqtl-a-ENSG00000010278	rs11064040	A	G	0.636923	CD9	TRUE	reported	igd	0.0796281706380876	2643.62543962723
6535649	4.54255e-28	0.0118547	31017	12	-0.130215	eqtl-a-ENSG00000010292	rs10774431	C	T	0.50848	NCAPD2	TRUE	reported	igd	0.00387485101843194	120.64598957223
6825371	2.54548e-10	0.0471552	14458	12	0.298219	eqtl-a-ENSG00000010292	rs7133104	G	A	0.0161462	NCAPD2	TRUE	reported	igd	0.00275869365087992	39.9899955639811
6709945	1.09144e-120	0.0137667	30902	12	0.321591	eqtl-a-ENSG00000010292	rs12816349	A	G	0.235335	NCAPD2	TRUE	reported	igd	0.0173523895794645	545.657295982214
6562065	1e-200	0.0139889	31567	12	-0.763137	eqtl-a-ENSG00000010292	rs2286721	A	G	0.18298	NCAPD2	TRUE	reported	igd	0.0861543895308557	2975.84545396608
50370254	1.19261e-15	0.0166439	29114	7	-0.133234	eqtl-a-ENSG00000010295	rs149007767	T	C	0.149708	IFFO1	TRUE	reported	igd	0.00219615623471514	64.0752194978179
6651436	1e-200	0.0131617	30601	12	-0.422705	eqtl-a-ENSG00000010295	rs7297283	G	C	0.256201	IFFO1	TRUE	reported	igd	0.0326075282600932	1031.38879656162
6721547	9.58738e-29	0.0330113	26840	12	-0.367214	eqtl-a-ENSG00000010295	rs11064282	G	T	0.0333348	IFFO1	TRUE	reported	igd	0.00458915853435927	123.731660952967
92753336	1.92265e-29	0.0428361	21415	1	-0.4826	eqtl-a-ENSG00000010327	rs141094656	C	T	0.0195137	STAB1	TRUE	reported	igd	0.00589210168541366	126.915371665055
43721508	5.76235e-10	0.0120219	31086	2	0.074495	eqtl-a-ENSG00000010327	rs12478601	T	C	0.574604	STAB1	TRUE	reported	igd	0.00123369290549757	38.3954785039199
53268265	1.27909e-09	0.0520193	7142	3	-0.315752	eqtl-a-ENSG00000010327	rs75482444	C	A	0.0132316	STAB1	TRUE	reported	igd	0.00513226077152094	36.8333804220823
52853401	9.65162e-13	0.0124944	31470	3	0.0891552	eqtl-a-ENSG00000010327	rs3821831	T	C	0.345391	STAB1	TRUE	reported	igd	0.00161533909155755	50.9137334771158
52213653	1e-200	0.0295219	27096	3	-0.976429	eqtl-a-ENSG00000010327	rs352155	C	T	0.0392624	STAB1	TRUE	reported	igd	0.0388059757448553	1093.85730695306
90973159	1.14541e-10	0.0127077	31086	6	0.0819187	eqtl-a-ENSG00000010327	rs1847472	A	C	0.323127	STAB1	TRUE	reported	igd	0.00133501816565016	41.5531789097546
50370254	1.05609e-24	0.0166197	29863	7	-0.170534	eqtl-a-ENSG00000010327	rs149007767	T	C	0.149708	STAB1	TRUE	reported	igd	0.00351328737709716	105.280153802913
54685880	8.70362e-13	0.0256028	29622	12	-0.183047	eqtl-a-ENSG00000010327	rs35979828	T	C	0.0571059	STAB1	TRUE	reported	igd	0.00172261077983672	51.111776996795
23589349	4.24424e-34	0.0118502	31355	14	0.144269	eqtl-a-ENSG00000010327	rs2239630	G	A	0.519173	STAB1	TRUE	reported	igd	0.00470478512906355	148.206407453348
86011033	1.50761e-10	0.0145558	31470	16	0.0932258	eqtl-a-ENSG00000010327	rs13333054	T	C	0.211395	STAB1	TRUE	reported	igd	0.00130178004911362	41.0178107532043
48955424	1.98381e-11	0.0128839	31086	20	0.0864178	eqtl-a-ENSG00000010327	rs913678	C	T	0.306921	STAB1	TRUE	reported	igd	0.0014451695273067	44.9866629412194
39091487	1.70137e-22	0.0132884	31355	20	0.129672	eqtl-a-ENSG00000010327	rs2902940	G	A	0.274749	STAB1	TRUE	reported	igd	0.00302777283773425	95.2180604385395
43359061	3.63354e-08	0.0135522	27185	2	-0.0746399	eqtl-a-ENSG00000010539	rs12466022	A	C	0.260124	ZNF200	TRUE	reported	igd	0.00111457380704085	30.3312662316675
50370254	3.75232e-13	0.0166505	29863	7	0.120956	eqtl-a-ENSG00000010539	rs149007767	T	C	0.149708	ZNF200	TRUE	reported	igd	0.00176400602754471	52.7680671770747
61650831	1.90301e-08	0.0155303	31355	8	0.0872896	eqtl-a-ENSG00000010539	rs7846314	T	A	0.178349	ZNF200	TRUE	reported	igd	0.00100651712038945	31.5891262719812
3313726	8.6856e-76	0.0118296	31347	16	0.217929	eqtl-a-ENSG00000010539	rs6501166	C	G	0.553028	ZNF200	TRUE	reported	igd	0.0107106854858531	339.361227932545
3266552	1e-200	0.0115451	31470	16	0.350174	eqtl-a-ENSG00000010539	rs2741916	A	G	0.522361	ZNF200	TRUE	reported	igd	0.0284028477942961	919.908845308843
3128428	3.33818e-10	0.0125752	27883	16	-0.0790009	eqtl-a-ENSG00000010539	rs2179016	G	C	0.663148	ZNF200	TRUE	reported	igd	0.00141345012763549	39.4641836640421
31252396	6.17874e-10	0.0137607	30488	6	-0.0851221	eqtl-a-ENSG00000010610	rs2524054	C	A	0.751859	CD4	TRUE	reported	igd	0.00125351614697831	38.2626561140459
6894164	1.54525e-166	0.0125524	30902	12	-0.345248	eqtl-a-ENSG00000010610	rs7296859	G	C	0.69135	CD4	TRUE	reported	igd	0.0238956292643136	756.450812437999
6911437	1.07349e-22	0.0337072	29989	12	-0.330496	eqtl-a-ENSG00000010610	rs2855535	C	T	0.96801	CD4	TRUE	reported	igd	0.00319547244587357	96.1298124011657
6857289	8.97429e-31	0.0336857	31181	12	-0.3885	eqtl-a-ENSG00000010610	rs1050629	A	G	0.0319467	CD4	TRUE	reported	igd	0.00424768379053253	133.003489672179
6953257	1e-200	0.0122806	29469	12	0.493676	eqtl-a-ENSG00000010626	rs11064426	C	A	0.301894	LRRC23	TRUE	reported	igd	0.0519868859454048	1615.90335138025
7025155	1.17951e-09	0.0319158	25331	12	-0.194137	eqtl-a-ENSG00000010626	rs11064462	A	G	0.0359795	LRRC23	TRUE	reported	igd	0.00145854194961165	36.997371259721
7033214	2.28718e-11	0.0378043	28332	12	-0.252771	eqtl-a-ENSG00000010626	rs7299785	C	T	0.0253504	LRRC23	TRUE	reported	igd	0.00157546986591379	44.7034903032116
112055276	5.68591e-13	0.0144213	31184	6	-0.103944	eqtl-a-ENSG00000010810	rs1067141	C	T	0.21663	FYN	TRUE	reported	igd	0.00166316486470036	51.9472035748917
112098264	4.70435e-34	0.0118545	31565	6	-0.144223	eqtl-a-ENSG00000010810	rs1474466	G	A	0.47667	FYN	TRUE	reported	igd	0.00466729283332439	148.00454424688
16444697	3.25087e-09	0.0121119	14710	19	0.0716818	eqtl-a-ENSG00000010810	rs10423726	A	C	0.595533	FYN	TRUE	reported	igd	0.00237545989503437	35.0214562008364
24022108	2.56791e-08	0.048715	10332	1	-0.271269	eqtl-a-ENSG00000011007	rs190085468	G	A	0.0151227	ELOA	TRUE	reported	igd	0.00299218941427287	31.0020807472712
24129617	2.67116e-18	0.0267078	25692	1	0.233015	eqtl-a-ENSG00000011007	rs140475877	T	C	0.0521098	ELOA	TRUE	reported	igd	0.00295398859600565	76.1128033845933
23974434	1e-200	0.0130945	31021	1	-0.396317	eqtl-a-ENSG00000011007	rs11580461	A	T	0.26336	ELOA	TRUE	reported	igd	0.0286822421829197	915.966441580834
11824242	1.15878e-64	0.0129142	31684	1	-0.219281	eqtl-a-ENSG00000011021	rs4845876	C	A	0.704574	CLCN6	TRUE	reported	igd	0.00901764032854394	288.296636262675
11908167	1.09189e-08	0.029199	29227	1	-0.16689	eqtl-a-ENSG00000011021	rs17376426	T	C	0.0433297	CLCN6	TRUE	reported	igd	0.0011164911289315	32.6659244578988
11826085	1e-200	0.0246914	28587	1	0.879524	eqtl-a-ENSG00000011021	rs114941496	A	G	0.0565031	CLCN6	TRUE	reported	igd	0.0424986160859472	1268.74275194347
199010721	2.92954e-14	0.013108	31684	1	-0.0996415	eqtl-a-ENSG00000011105	rs1434282	T	C	0.711362	TSPAN9	TRUE	reported	igd	0.00182043977567598	57.7803586360803
38050232	3.22827e-10	0.0126127	31684	2	-0.0793	eqtl-a-ENSG00000011105	rs4670221	G	C	0.332826	TSPAN9	TRUE	reported	igd	0.00124608805116896	39.5278167773099
56849749	1e-200	0.0115581	31684	3	0.482322	eqtl-a-ENSG00000011105	rs1354034	C	T	0.618137	TSPAN9	TRUE	reported	igd	0.0520984129656342	1741.30093477455
88180196	2.20689e-09	0.0266956	30031	5	0.15969	eqtl-a-ENSG00000011105	rs114694170	C	T	0.0523176	TSPAN9	TRUE	reported	igd	0.0011901154870517	35.7805609604099
65050659	7.78395e-23	0.0120128	31569	10	0.118175	eqtl-a-ENSG00000011105	rs7075195	G	A	0.421253	TSPAN9	TRUE	reported	igd	0.00305613552025072	96.7687684382294
202856	1.22659e-38	0.0144814	26110	11	0.188257	eqtl-a-ENSG00000011105	rs11602954	A	G	0.211758	TSPAN9	TRUE	reported	igd	0.00643090906709966	168.98490045236
54712308	3.89404e-43	0.012021	31684	12	0.165522	eqtl-a-ENSG00000011105	rs10876550	A	G	0.590064	TSPAN9	TRUE	reported	igd	0.00594838659349002	189.584505988707
122216910	2.70085e-15	0.019008	30031	12	0.150241	eqtl-a-ENSG00000011105	rs11553699	G	A	0.10963	TSPAN9	TRUE	reported	igd	0.00207602103169094	62.4705256858319
3390867	1.46622e-13	0.0304673	30542	12	0.225166	eqtl-a-ENSG00000011105	rs71577846	C	T	0.0395806	TSPAN9	TRUE	reported	igd	0.00178510702873509	54.614661673996
57036023	1.29688e-11	0.0127648	31569	12	0.0864065	eqtl-a-ENSG00000011105	rs2950393	A	G	0.317506	TSPAN9	TRUE	reported	igd	0.00144935265664634	45.8181219290953
3367106	2.07874e-24	0.025203	31231	12	-0.256949	eqtl-a-ENSG00000011105	rs71458049	A	G	0.0588202	TSPAN9	TRUE	reported	igd	0.0033171147480734	103.934940591862
33884804	5.91562e-134	0.015201	31684	17	0.374414	eqtl-a-ENSG00000011105	rs10512472	C	T	0.179037	TSPAN9	TRUE	reported	igd	0.0187880906505627	606.641931594354
20720973	2.74789e-18	0.0118718	31300	18	0.103537	eqtl-a-ENSG00000011105	rs11082304	T	G	0.50307	TSPAN9	TRUE	reported	igd	0.00242415061813428	76.0554358782635
1600925	4.12534e-08	0.0123461	31684	20	-0.0677218	eqtl-a-ENSG00000011105	rs11696739	A	G	0.365478	TSPAN9	TRUE	reported	igd	0.000948735549910912	30.0863837140753
1924707	1.35644e-14	0.0131675	31569	20	-0.101394	eqtl-a-ENSG00000011105	rs13042885	T	C	0.284247	TSPAN9	TRUE	reported	igd	0.00187474445684269	59.2912141442094
93885198	9.23634e-14	0.0120565	30152	14	0.0898364	eqtl-a-ENSG00000011114	rs10144067	T	C	0.585198	BTBD7	TRUE	reported	igd	0.0018380066752961	55.5179436111335
93926805	1.04641e-21	0.0127205	30158	14	0.121762	eqtl-a-ENSG00000011114	rs10140069	G	A	0.680262	BTBD7	TRUE	reported	igd	0.00302897146925838	91.6191754955687
93703854	3.60579e-116	0.0116977	31684	14	-0.268006	eqtl-a-ENSG00000011114	rs10147990	A	G	0.479762	BTBD7	TRUE	reported	igd	0.0162971624618195	524.880768268928
43360065	1.14091e-10	0.0136471	26953	2	0.0879843	eqtl-a-ENSG00000011198	rs28498283	T	A	0.254318	ABHD5	TRUE	reported	igd	0.00153976088255366	41.5620912279736
43705084	4.2924e-13	0.0349808	31181	3	-0.253468	eqtl-a-ENSG00000011198	rs114302694	G	T	0.029725	ABHD5	TRUE	reported	igd	0.00168099376007914	52.4999565448637
43795043	1.7697e-28	0.0353554	31240	3	-0.391352	eqtl-a-ENSG00000011198	rs76958399	T	G	0.0289318	ABHD5	TRUE	reported	igd	0.0039067227259139	122.516843850275
43714796	6.04644e-97	0.0262945	31568	3	-0.549402	eqtl-a-ENSG00000011198	rs55659203	G	A	0.0524478	ABHD5	TRUE	reported	igd	0.0136407637097072	436.539073613837
40974023	9.6917e-13	0.0292185	29277	13	-0.208468	eqtl-a-ENSG00000011198	rs77526211	A	G	0.0432109	ABHD5	TRUE	reported	igd	0.00173572900669935	50.9018184338728
15747613	6.1038e-25	0.0163908	21339	17	-0.169051	eqtl-a-ENSG00000011295	rs12451376	C	G	0.154843	TTC19	TRUE	reported	igd	0.0049602271256927	106.363955558462
15868225	1e-200	0.011822	26487	17	0.366222	eqtl-a-ENSG00000011295	rs2535613	G	A	0.612596	TTC19	TRUE	reported	igd	0.0349637344229638	959.564463246873
15638786	3.6166e-11	0.050075	8749	17	0.331446	eqtl-a-ENSG00000011295	rs62072376	A	G	0.0142873	TTC19	TRUE	reported	igd	0.00498259867103048	43.8010335470449
45493941	1e-200	0.0124343	31181	3	-0.416693	eqtl-a-ENSG00000011376	rs2138209	C	T	0.305644	LARS2	TRUE	reported	igd	0.0347642671654359	1122.95375013525
45744646	3.29868e-09	0.0423309	27709	3	-0.25043	eqtl-a-ENSG00000011376	rs114078070	G	T	0.0201246	LARS2	TRUE	reported	igd	0.00126150402344488	34.9966403802339
45764497	1.38325e-19	0.0347303	29272	3	0.314438	eqtl-a-ENSG00000011376	rs77926264	A	G	0.0301046	LARS2	TRUE	reported	igd	0.00279245472455185	81.9640306322149
16900103	4.94629e-10	0.0135463	26196	11	-0.0842678	eqtl-a-ENSG00000011405	rs448671	G	T	0.260231	PIK3C2A	TRUE	reported	igd	0.00147504705029802	38.6944585825014
17028390	1e-200	0.0124059	26080	11	-0.40354	eqtl-a-ENSG00000011405	rs11024110	A	T	0.310554	PIK3C2A	TRUE	reported	igd	0.0389885947080691	1057.99428310444
17458136	3.55468e-19	0.0150334	26196	11	0.13455	eqtl-a-ENSG00000011405	rs7108578	C	T	0.193168	PIK3C2A	TRUE	reported	igd	0.003048540785337	80.0976583092831
103434253	2.20409e-10	0.0127346	31355	4	0.0808199	eqtl-a-ENSG00000011422	rs3774937	C	T	0.320593	PLAUR	TRUE	reported	igd	0.0012829261889763	40.2752549823586
148200011	4.46992e-46	0.0119814	31355	5	-0.170737	eqtl-a-ENSG00000011422	rs56330463	C	T	0.582097	PLAUR	TRUE	reported	igd	0.00643472155363398	203.054423546844
28724374	4.64195e-13	0.0131031	31141	7	-0.0948046	eqtl-a-ENSG00000011422	rs56388170	T	G	0.289189	PLAUR	TRUE	reported	igd	0.00167821926128787	52.3459175042483
40974023	5.66239e-11	0.0292267	29063	13	0.191511	eqtl-a-ENSG00000011422	rs77526211	A	G	0.0432109	PLAUR	TRUE	reported	igd	0.00147518437993964	42.933668342338
43345165	1.14041e-08	0.0210324	16096	19	0.120063	eqtl-a-ENSG00000011422	rs116869386	A	G	0.0875601	PLAUR	TRUE	reported	igd	0.00202043276336581	32.5826759997173
44153100	9.05733e-31	0.017283	30333	19	0.199316	eqtl-a-ENSG00000011422	rs4760	G	A	0.135973	PLAUR	TRUE	reported	igd	0.00436546642585451	132.989523462258
44283031	3.88866e-22	0.0122554	31023	19	0.118559	eqtl-a-ENSG00000011422	rs56681946	C	T	0.374685	PLAUR	TRUE	reported	igd	0.00300761417193686	93.5806537280248
144385777	7.97425e-09	0.0266264	25521	6	0.153613	eqtl-a-ENSG00000012061	rs149110519	T	C	0.0526158	ERCC1	TRUE	reported	igd	0.00130246879303926	33.281048656844
45993568	2.55971e-09	0.0120578	31141	19	0.0718333	eqtl-a-ENSG00000012061	rs4511641	C	A	0.583486	ERCC1	TRUE	reported	igd	0.00113838261565803	35.4884957555993
45913086	7.8343e-80	0.0146681	31350	19	0.277519	eqtl-a-ENSG00000012061	rs3212985	G	C	0.200951	ERCC1	TRUE	reported	igd	0.0112893615436459	357.939817682901
45903766	1e-200	0.015998	31010	19	-0.495187	eqtl-a-ENSG00000012061	rs4572514	C	T	0.153027	ERCC1	TRUE	reported	igd	0.0299702504426647	958.029922433033
158252438	6.77954e-13	0.0243915	31569	5	-0.175218	eqtl-a-ENSG00000012124	rs17056278	G	C	0.0633351	CD22	TRUE	reported	igd	0.00163196283177994	51.6003806140651
31237858	6.83754e-12	0.0128421	27494	6	-0.0881082	eqtl-a-ENSG00000012124	rs34794906	C	T	0.310471	CD22	TRUE	reported	igd	0.00170914821617267	47.0683495446816
112072424	3.29306e-12	0.0122366	31185	12	-0.0852209	eqtl-a-ENSG00000012124	rs11065987	G	A	0.380678	CD22	TRUE	reported	igd	0.00155292330219701	48.5001243056029
91045408	9.32331e-09	0.0128025	31684	15	0.0735211	eqtl-a-ENSG00000012124	rs3540	A	G	0.314574	CD22	TRUE	reported	igd	0.00103978275892236	32.9766859576835
38053207	7.78037e-16	0.0118776	31569	17	-0.0957065	eqtl-a-ENSG00000012124	rs12453507	G	C	0.492239	CD22	TRUE	reported	igd	0.00205244897532299	64.9229077595269
16170764	3.99669e-11	0.0118929	31569	17	0.0785429	eqtl-a-ENSG00000012124	rs7210990	A	C	0.481977	CD22	TRUE	reported	igd	0.00137967852656412	43.6124832546863
35814384	7.32656e-60	0.0185224	26609	19	0.302255	eqtl-a-ENSG00000012124	rs12327820	C	A	0.114435	CD22	TRUE	reported	igd	0.00990830426703898	266.268521157469
44747947	1.00647e-17	0.013652	31300	20	-0.117043	eqtl-a-ENSG00000012124	rs4810485	G	T	0.746826	CD22	TRUE	reported	igd	0.0023428006398937	73.4971636293744
182323766	7.87771e-38	0.0119359	31569	2	0.153458	eqtl-a-ENSG00000012223	rs1375493	A	G	0.565077	LTF	TRUE	reported	igd	0.005208825673292	165.287956178437
46369762	1.52721e-12	0.0541486	17424	3	-0.382933	eqtl-a-ENSG00000012223	rs181225830	A	G	0.0121872	LTF	TRUE	reported	igd	0.00286205847405182	50.0059025520827
159506600	1.23566e-26	0.0127615	31684	6	-0.136318	eqtl-a-ENSG00000012223	rs2451258	T	C	0.685013	LTF	TRUE	reported	igd	0.0035884072777515	114.097347124517
45009341	8.76577e-10	0.0161005	30971	7	-0.0987044	eqtl-a-ENSG00000012223	rs3735485	G	A	0.837214	LTF	TRUE	reported	igd	0.00121202722472839	37.5808200997021
61650831	1.6355e-09	0.0155277	31569	8	-0.0936351	eqtl-a-ENSG00000012223	rs7846314	T	A	0.178349	LTF	TRUE	reported	igd	0.00115054154995601	36.360979925663
131466489	3.19595e-15	0.0183072	28587	9	0.144319	eqtl-a-ENSG00000012223	rs13289095	T	G	0.119513	LTF	TRUE	reported	igd	0.00216915961775096	62.1402197286847
32265903	1.17652e-20	0.0132731	31300	22	-0.123688	eqtl-a-ENSG00000012223	rs1012068	G	T	0.276034	LTF	TRUE	reported	igd	0.00276670486695055	86.8325690171279
85794297	5.70953e-15	0.0120297	31684	2	-0.0939517	eqtl-a-ENSG00000012232	rs10187424	C	T	0.420816	EXTL3	TRUE	reported	igd	0.00192142934108665	60.9919160413582
148200011	2.13639e-10	0.0120501	31569	5	-0.0765348	eqtl-a-ENSG00000012232	rs56330463	C	T	0.582097	EXTL3	TRUE	reported	igd	0.00127620714715701	40.3375100329078
28724374	1.33414e-32	0.0130621	31355	7	-0.155306	eqtl-a-ENSG00000012232	rs56388170	T	G	0.289189	EXTL3	TRUE	reported	igd	0.00448838380801612	141.35876994688
50370254	1.11584e-25	0.0166171	30077	7	-0.174078	eqtl-a-ENSG00000012232	rs149007767	T	C	0.149708	EXTL3	TRUE	reported	igd	0.00363547406573776	109.73582427028
28688042	1.2483e-08	0.0162646	31560	8	0.0925959	eqtl-a-ENSG00000012232	rs13258975	A	G	0.158826	EXTL3	TRUE	reported	igd	0.00102592110783805	32.4092676729484
51060350	6.51478e-29	0.0124598	31569	12	0.139032	eqtl-a-ENSG00000012232	rs2731439	T	C	0.345663	EXTL3	TRUE	reported	igd	0.00392859307068067	124.50301916053
40974023	7.31644e-13	0.0292179	29277	13	-0.209589	eqtl-a-ENSG00000012232	rs77526211	A	G	0.0432109	EXTL3	TRUE	reported	igd	0.00175448544257142	51.4528345805288
52854321	2.50957e-11	0.0252045	29078	6	-0.168185	eqtl-a-ENSG00000012660	rs45621538	C	T	0.0590759	ELOVL5	TRUE	reported	igd	0.00152893596770883	44.5234156486926
53213479	4.89666e-76	0.0181945	31472	6	0.335751	eqtl-a-ENSG00000012660	rs113274699	T	C	0.118536	ELOVL5	TRUE	reported	igd	0.0107042484459451	340.507576288209
54685880	3.93378e-08	0.0256217	29836	12	0.140763	eqtl-a-ENSG00000012660	rs35979828	T	C	0.0571059	ELOVL5	TRUE	reported	igd	0.00101060495691601	30.1808892409031
43721508	1.5621e-08	0.0120246	31300	2	0.0679934	eqtl-a-ENSG00000012779	rs12478601	T	C	0.574604	ALOX5	TRUE	reported	igd	0.0010204799765974	31.9716086940374
28724374	3.59253e-18	0.0130924	31355	7	-0.113784	eqtl-a-ENSG00000012779	rs56388170	T	G	0.289189	ALOX5	TRUE	reported	igd	0.00240310168666664	75.5259437047631
45892260	1.7358e-53	0.0245202	31355	10	-0.377516	eqtl-a-ENSG00000012779	rs35300270	T	C	0.061758	ALOX5	TRUE	reported	igd	0.00750317421660243	237.025464567557
45089392	5.4325e-12	0.044054	15407	10	-0.303695	eqtl-a-ENSG00000012779	rs117131030	T	C	0.0185346	ALOX5	TRUE	reported	igd	0.00307502733831652	47.5169119500448
45736656	2.09074e-20	0.0434896	25548	10	0.402618	eqtl-a-ENSG00000012779	rs61854878	T	G	0.0189762	ALOX5	TRUE	reported	igd	0.00334352160981018	85.7001433253831
46012620	1.44544e-158	0.0118458	31684	10	0.31782	eqtl-a-ENSG00000012779	rs4949006	T	C	0.599027	ALOX5	TRUE	reported	igd	0.0222145350194976	719.790714522186
108962642	1.32404e-11	0.0161696	31684	6	0.109405	eqtl-a-ENSG00000012822	rs9480866	T	C	0.160953	CALCOCO1	TRUE	reported	igd	0.00144280861530071	45.7771101588778
50370254	3.07256e-20	0.0166316	30077	7	0.153286	eqtl-a-ENSG00000012822	rs149007767	T	C	0.149708	CALCOCO1	TRUE	reported	igd	0.00281629133483746	84.9391753587879
54111151	4.22377e-41	0.0174686	31684	12	-0.234542	eqtl-a-ENSG00000012822	rs11170657	G	A	0.132061	CALCOCO1	TRUE	reported	igd	0.00565745444011593	180.259280237102
16170764	4.76672e-10	0.0118949	31569	17	-0.0740625	eqtl-a-ENSG00000012822	rs7210990	A	C	0.481977	CALCOCO1	TRUE	reported	igd	0.00122653886372248	38.765699948694
31418399	7.71969e-19	0.0125696	31568	2	0.111414	eqtl-a-ENSG00000013016	rs2365214	C	T	0.664421	EHD3	TRUE	reported	igd	0.00248261869953484	78.5613798201195
31477838	2.28665e-95	0.0132209	31234	2	-0.273938	eqtl-a-ENSG00000013016	rs655029	A	G	0.730915	EHD3	TRUE	reported	igd	0.0135589497632661	429.293893339798
56849749	3.35738e-125	0.0120117	31684	3	0.285874	eqtl-a-ENSG00000013016	rs1354034	C	T	0.618137	EHD3	TRUE	reported	igd	0.0175632529803956	566.386571566006
99192919	3.77051e-50	0.0138892	26161	9	-0.206823	eqtl-a-ENSG00000013016	rs10820606	C	A	0.236914	EHD3	TRUE	reported	igd	0.0084047212236984	221.722619294888
243268	1.21116e-16	0.0142858	31569	11	0.118315	eqtl-a-ENSG00000013016	rs505404	G	T	0.222031	EHD3	TRUE	reported	igd	0.00216803889887092	68.5871836026729
6602648	1e-200	0.0201219	27274	4	-0.729651	eqtl-a-ENSG00000013288	rs11937713	T	C	0.0877292	MAN2B2	TRUE	reported	igd	0.0459933413014424	1314.80256718971
6644273	2.20191e-21	0.0160228	31569	4	-0.152136	eqtl-a-ENSG00000013288	rs12695	G	C	0.836001	MAN2B2	TRUE	reported	igd	0.00284765814405119	90.1487374195526
6629414	4.83159e-08	0.0399558	15779	4	0.218063	eqtl-a-ENSG00000013288	rs192170695	C	A	0.0226551	MAN2B2	TRUE	reported	igd	0.00188410802041867	29.7816841481103
8762414	5.88044e-10	0.0122637	31355	2	0.0759576	eqtl-a-ENSG00000013306	rs3896594	G	T	0.377086	SLC25A39	TRUE	reported	igd	0.00122197298911738	38.3593932702524
56849749	1.2878e-10	0.0122325	31470	3	-0.0786388	eqtl-a-ENSG00000013306	rs1354034	C	T	0.618137	SLC25A39	TRUE	reported	igd	0.00131152508526712	41.3252705121179
139838419	4.09449e-13	0.0118821	31470	6	-0.0861752	eqtl-a-ENSG00000013306	rs628751	A	C	0.505619	SLC25A39	TRUE	reported	igd	0.00166861512286515	52.5957427380517
50427982	2.23049e-15	0.0119381	31470	7	0.0946449	eqtl-a-ENSG00000013306	rs6592965	A	G	0.449532	SLC25A39	TRUE	reported	igd	0.00199324528873038	62.848715652144
33875262	2.0193e-49	0.0128198	30971	17	0.189457	eqtl-a-ENSG00000013306	rs8073060	A	T	0.305723	SLC25A39	TRUE	reported	igd	0.00700247793463795	218.389003334822
42406560	7.49204e-47	0.0120339	31470	17	0.172981	eqtl-a-ENSG00000013306	rs12601548	T	C	0.405558	SLC25A39	TRUE	reported	igd	0.0065229657715006	206.612412592891
27179590	1.59151e-08	0.0144539	27110	17	-0.0816821	eqtl-a-ENSG00000013306	rs35033748	C	T	0.215702	SLC25A39	TRUE	reported	igd	0.00117663800574452	31.9338776738644
151084790	8.80643e-15	0.0128389	26304	7	-0.0995718	eqtl-a-ENSG00000013374	rs740512	G	A	0.689769	NUB1	TRUE	reported	igd	0.00228141005961772	60.1428579091132
151062348	3.1703e-97	0.0118651	31256	7	-0.248275	eqtl-a-ENSG00000013374	rs405281	A	G	0.422863	NUB1	TRUE	reported	igd	0.0138149146891542	437.819786697273
151038887	4.73696e-55	0.0186991	26912	7	-0.292219	eqtl-a-ENSG00000013374	rs113920358	T	C	0.112167	NUB1	TRUE	reported	igd	0.0089930337927913	244.198625858513
99144154	4.38834e-13	0.012995	31256	10	-0.0941227	eqtl-a-ENSG00000013374	rs11189181	G	A	0.297492	NUB1	TRUE	reported	igd	0.00167561587661908	52.4575973908903
112007756	2.2475e-10	0.0119248	28105	12	-0.0756424	eqtl-a-ENSG00000013374	rs653178	T	C	0.539991	NUB1	TRUE	reported	igd	0.00142962942309394	40.2343959534846
77177339	5.55904e-113	0.0121848	26606	14	-0.275244	eqtl-a-ENSG00000013523	rs6574316	T	G	0.640476	ANGEL1	TRUE	reported	igd	0.0188178058138462	510.230320971951
77286526	1.2735e-111	0.0130362	26488	14	-0.292665	eqtl-a-ENSG00000013523	rs10133337	T	A	0.279221	ANGEL1	TRUE	reported	igd	0.0186725793203769	503.972400503179
77241392	1e-200	0.0139955	26494	14	0.426972	eqtl-a-ENSG00000013523	rs4903489	T	C	0.216558	ANGEL1	TRUE	reported	igd	0.0339374848805661	930.655972449988
141488359	3.56123e-19	0.0170055	30519	5	-0.152195	eqtl-a-ENSG00000013561	rs3761758	T	G	0.141951	RNF14	TRUE	reported	igd	0.0026176605822104	80.0928037626429
141338771	1e-200	0.0150924	30277	5	-0.530587	eqtl-a-ENSG00000013561	rs252108	G	A	0.827116	RNF14	TRUE	reported	igd	0.0392200104154977	1235.85610462463
141345805	6.71429e-136	0.0154578	30601	5	0.383534	eqtl-a-ENSG00000013561	rs7734658	C	T	0.171449	RNF14	TRUE	reported	igd	0.0197208895635525	615.579270567619
31490051	9.36052e-37	0.0498979	17693	12	-0.631902	eqtl-a-ENSG00000013573	rs147981800	T	C	0.0142712	DDX11	TRUE	reported	igd	0.00898285959810095	160.356226619407
31172983	1e-200	0.0106015	26278	12	-0.683836	eqtl-a-ENSG00000013573	rs35040	A	T	0.4189	DDX11	TRUE	reported	igd	0.136691903300308	4160.41094118023
31066875	2.04644e-55	0.0202894	25950	12	0.318152	eqtl-a-ENSG00000013573	rs33217	G	C	0.906723	DDX11	TRUE	reported	igd	0.00938637373262436	245.865410242599
31161777	1e-200	0.013571	26395	12	0.444311	eqtl-a-ENSG00000013573	rs35051	A	C	0.766902	DDX11	TRUE	reported	igd	0.0390248222245326	1071.80930037794
31795208	1.13501e-27	0.011874	26395	12	0.129445	eqtl-a-ENSG00000013573	rs10843987	T	G	0.470743	DDX11	TRUE	reported	igd	0.0044823294857411	118.834778749887
32170435	2.4555e-08	0.0303218	24644	12	0.169089	eqtl-a-ENSG00000013573	rs117776622	C	T	0.0400475	DDX11	TRUE	reported	igd	0.00126026502045051	31.0946381186859
114303808	4.50754e-09	0.0192282	29781	1	0.112764	eqtl-a-ENSG00000013725	rs6679677	A	C	0.107034	CD6	TRUE	reported	igd	0.00115351475330871	34.390185425037
25488819	1.02376e-19	0.0131679	31684	2	0.119649	eqtl-a-ENSG00000013725	rs7578575	A	T	0.283449	CD6	TRUE	reported	igd	0.00259905146491548	82.5577202752738
32573471	1.17355e-18	0.0126042	24117	6	-0.111135	eqtl-a-ENSG00000013725	rs9270965	G	A	0.668066	CD6	TRUE	reported	igd	0.0032132912474776	77.7383142777848
90976768	3.51172e-08	0.0162939	29113	6	-0.0898395	eqtl-a-ENSG00000013725	rs72928038	A	G	0.158151	CD6	TRUE	reported	igd	0.00104314415902859	30.3986798187763
60793330	1e-200	0.0119724	31355	11	-0.362353	eqtl-a-ENSG00000013725	rs34383631	T	C	0.366096	CD6	TRUE	reported	igd	0.0283849868730439	915.953830896867
60859624	8.88587e-17	0.0122968	31231	11	0.102292	eqtl-a-ENSG00000013725	rs477537	C	A	0.629913	CD6	TRUE	reported	igd	0.00221081307123089	69.1944574123735
60789643	5.14162e-36	0.0125247	31563	11	-0.156928	eqtl-a-ENSG00000013725	rs55753183	C	A	0.3367	CD6	TRUE	reported	igd	0.00494917946396349	156.977965183734
1766881	1.04906e-11	0.0438034	10333	4	0.297845	eqtl-a-ENSG00000013810	rs146594798	T	C	0.0187532	TACC3	TRUE	reported	igd	0.0044545072053593	46.2254254292122
1526026	3.08589e-10	0.0146414	9825	4	0.0921605	eqtl-a-ENSG00000013810	rs13112920	C	T	0.208075	TACC3	TRUE	reported	igd	0.00401646542745245	39.6128435103077
1588848	3.57437e-24	0.0129379	10896	4	-0.131227	eqtl-a-ENSG00000013810	rs10010688	T	A	0.699776	TACC3	TRUE	reported	igd	0.00935342074165458	102.85824197351
1684409	1e-200	0.011622	14263	4	0.378939	eqtl-a-ENSG00000013810	rs6852065	T	C	0.578182	TACC3	TRUE	reported	igd	0.0693657396580303	1062.95765739343
144385777	1.90941e-11	0.0266153	10586	6	-0.178663	eqtl-a-ENSG00000013810	rs149110519	T	C	0.0526158	TACC3	TRUE	reported	igd	0.00423867265884779	45.053076665504
65146496	2.76567e-79	0.0118886	31565	11	0.224138	eqtl-a-ENSG00000014216	rs585210	C	G	0.574368	CAPN1	TRUE	reported	igd	0.0111352673607439	355.420142013877
64684288	1.78156e-26	0.0144288	28576	11	-0.153637	eqtl-a-ENSG00000014216	rs2285346	A	G	0.215033	CAPN1	TRUE	reported	igd	0.00395193749621214	113.370695920947
64876740	1e-200	0.0139484	31569	11	-0.43205	eqtl-a-ENSG00000014216	rs72932837	T	C	0.218012	CAPN1	TRUE	reported	igd	0.0294955130679666	959.382335222225
43359061	1.36801e-09	0.0135491	27399	2	-0.0820955	eqtl-a-ENSG00000014257	rs12466022	A	C	0.260124	ACP3	TRUE	reported	igd	0.00133814002150057	36.7101454839184
132688562	3.49543e-12	0.0329357	30507	3	-0.229104	eqtl-a-ENSG00000014257	rs13067357	T	C	0.033678	ACP3	TRUE	reported	igd	0.0015835936585881	48.3841453810316
131870878	1e-200	0.0155263	31569	3	-0.483887	eqtl-a-ENSG00000014257	rs3914905	G	A	0.164566	ACP3	TRUE	reported	igd	0.0298490458103805	971.235275322025
132270837	3.35583e-40	0.0135332	31177	3	-0.179614	eqtl-a-ENSG00000014257	rs2010811	A	G	0.257164	ACP3	TRUE	reported	igd	0.0056182130922129	176.137370430317
132062068	2.95053e-25	0.0467148	19424	3	0.485068	eqtl-a-ENSG00000014257	rs71315648	C	T	0.0163774	ACP3	TRUE	reported	igd	0.00552018415489203	107.808137428313
28780373	8.3778e-10	0.0143275	31569	10	0.0879351	eqtl-a-ENSG00000014257	rs2998286	C	T	0.779099	ACP3	TRUE	reported	igd	0.00119180433701216	37.6665786983158
16170764	3.46338e-16	0.0118833	31569	17	-0.0969176	eqtl-a-ENSG00000014257	rs7210990	A	C	0.481977	ACP3	TRUE	reported	igd	0.00210259799722653	66.5125601542205
42035678	7.83664e-10	0.0351513	24593	4	0.21612	eqtl-a-ENSG00000014824	rs111311484	T	C	0.02946	SLC30A9	TRUE	reported	igd	0.00153471802575588	37.7982606433144
42172494	3.06902e-132	0.038251	23892	4	-0.936005	eqtl-a-ENSG00000014824	rs139876401	G	A	0.0237913	SLC30A9	TRUE	reported	igd	0.0244493911558839	598.734652429907
42109339	3.08674e-27	0.0261746	30820	4	0.28295	eqtl-a-ENSG00000014824	rs6816870	T	G	0.0542198	SLC30A9	TRUE	reported	igd	0.00377731394888191	116.850642839777
150017171	3.42926e-35	0.022345	30538	1	-0.276588	eqtl-a-ENSG00000014914	rs112111167	A	G	0.0759533	MTMR11	TRUE	reported	igd	0.00499219849553905	153.206611073086
149903122	7.9965e-67	0.0230392	29984	1	0.397875	eqtl-a-ENSG00000014914	rs72692819	C	G	0.0702959	MTMR11	TRUE	reported	igd	0.0098485113367302	298.21504111101
150149016	8.86115e-09	0.0248403	31684	1	0.142862	eqtl-a-ENSG00000014914	rs6700343	A	G	0.0609944	MTMR11	TRUE	reported	igd	0.00104286148509291	33.0744296195052
182323766	3.81048e-10	0.011989	31569	2	0.075069	eqtl-a-ENSG00000014914	rs1375493	A	G	0.565077	MTMR11	TRUE	reported	igd	0.00124038209998972	39.2037694041967
42906116	2.73716e-12	0.0239885	29452	3	0.167694	eqtl-a-ENSG00000014914	rs2228467	C	T	0.0656561	MTMR11	TRUE	reported	igd	0.00165650999956781	48.865165121927
187456594	4.58564e-14	0.0123854	31355	3	-0.0934266	eqtl-a-ENSG00000014914	rs3733018	C	A	0.64143	MTMR11	TRUE	reported	igd	0.00181145183931614	56.8975166292295
31540556	4.75445e-10	0.013335	30602	6	-0.0830359	eqtl-a-ENSG00000014914	rs2229094	C	T	0.273416	MTMR11	TRUE	reported	igd	0.0012654529899317	38.7719255410114
50305863	4.53628e-11	0.0127773	31300	7	-0.0841437	eqtl-a-ENSG00000014914	rs4917014	G	T	0.316454	MTMR11	TRUE	reported	igd	0.00138362809177176	43.3647927617316
50370254	1.49692e-11	0.0166548	30077	7	0.112391	eqtl-a-ENSG00000014914	rs149007767	T	C	0.149708	MTMR11	TRUE	reported	igd	0.00151179411586283	45.5360491657631
130613614	2.40713e-12	0.0120188	31569	8	-0.0842365	eqtl-a-ENSG00000014914	rs10098310	A	G	0.575007	MTMR11	TRUE	reported	igd	0.00155361117465258	49.1191560199399
113915905	5.3889e-16	0.0142623	31684	9	0.115561	eqtl-a-ENSG00000014914	rs10980800	C	T	0.22312	MTMR11	TRUE	reported	igd	0.00206778074930602	65.6471736614567
54685880	3.28398e-12	0.0256052	29836	12	0.17834	eqtl-a-ENSG00000014914	rs35979828	T	C	0.0571059	MTMR11	TRUE	reported	igd	0.00162328592991823	48.5078545509635
69744014	2.95733e-10	0.023909	28627	12	0.150653	eqtl-a-ENSG00000014914	rs1800973	A	C	0.0661727	MTMR11	TRUE	reported	igd	0.00138501661910147	39.7010873876077
77747190	8.2054e-11	0.0128692	31684	15	0.0836086	eqtl-a-ENSG00000014914	rs7178572	G	A	0.691702	MTMR11	TRUE	reported	igd	0.00133039507840778	42.2057271658173
86011033	2.72396e-26	0.0145192	31684	16	-0.154026	eqtl-a-ENSG00000014914	rs13333054	T	C	0.211395	MTMR11	TRUE	reported	igd	0.00353934460875186	112.531804730864
57885709	1.22603e-22	0.0207187	31569	17	0.202865	eqtl-a-ENSG00000014914	rs7212590	T	C	0.0900785	MTMR11	TRUE	reported	igd	0.00302769077415553	95.8653653499988
42839620	8.71164e-26	0.016336	31599	20	0.171519	eqtl-a-ENSG00000014914	rs4142441	G	A	0.156066	MTMR11	TRUE	reported	igd	0.00347653984199462	110.231453427184
48887268	7.36377e-12	0.0148253	31684	20	-0.101558	eqtl-a-ENSG00000014914	rs17196752	T	C	0.20106	MTMR11	TRUE	reported	igd	0.0014788990869815	46.923876551938
8762414	1.46511e-08	0.0122664	9188	2	0.0694989	eqtl-a-ENSG00000017483	rs3896594	G	T	0.377086	SLC38A5	TRUE	reported	igd	0.00348165654599948	32.0942381458807
50427982	1e-200	0.0114813	9188	7	-0.399928	eqtl-a-ENSG00000017483	rs6592965	A	G	0.449532	SLC38A5	TRUE	reported	igd	0.116652034883327	1213.07
33946107	4.67951e-30	0.0119344	9188	17	-0.135935	eqtl-a-ENSG00000017483	rs225245	G	A	0.440335	SLC38A5	TRUE	reported	igd	0.0139235824067385	129.708028410692
173205318	5.29578e-09	0.013722	31569	5	-0.0801051	eqtl-a-ENSG00000017797	rs2594836	A	G	0.749651	RALBP1	TRUE	reported	igd	0.00107834097644208	34.076735944059
9358227	7.14661e-23	0.0254772	26376	18	-0.250838	eqtl-a-ENSG00000017797	rs72941910	A	G	0.057509	RALBP1	TRUE	reported	igd	0.0036616865345494	96.9282
9439544	1e-200	0.0207312	31230	18	1.03652	eqtl-a-ENSG00000017797	rs117549632	C	T	0.0757599	RALBP1	TRUE	reported	igd	0.074112699593546	2499.64696771547
8976685	3.86198e-09	0.0184144	31684	18	0.108463	eqtl-a-ENSG00000017797	rs12150726	A	G	0.118174	RALBP1	TRUE	reported	igd	0.00109378708043399	34.691307185913
9617586	1.57253e-52	0.0437419	25309	18	0.667196	eqtl-a-ENSG00000017797	rs62088916	T	C	0.0185579	RALBP1	TRUE	reported	igd	0.00910882910244746	232.636181314276
9520003	4.32912e-89	0.0226838	31569	18	0.453951	eqtl-a-ENSG00000017797	rs11876700	G	C	0.0721484	RALBP1	TRUE	reported	igd	0.0125271043186147	400.459702494256
9677288	3.70851e-08	0.0457846	26670	18	-0.252008	eqtl-a-ENSG00000017797	rs116953370	G	T	0.0171567	RALBP1	TRUE	reported	igd	0.00113468085086191	30.2940430012741
219234800	3.12608e-144	0.0371766	29949	2	-0.950675	eqtl-a-ENSG00000018280	rs62182121	C	T	0.0251266	SLC11A1	TRUE	reported	igd	0.0213679047132139	653.876615664329
85794297	5.50427e-19	0.0120219	31684	2	0.107017	eqtl-a-ENSG00000018280	rs10187424	C	T	0.420816	SLC11A1	TRUE	reported	igd	0.00249479284093646	79.2377084543329
219523436	1.39927e-13	0.0533236	7917	2	0.394403	eqtl-a-ENSG00000018280	rs13004810	T	C	0.0125679	SLC11A1	TRUE	reported	igd	0.00686262356644015	54.693003019817
219093934	1e-200	0.0144185	28802	2	0.49284	eqtl-a-ENSG00000018280	rs17572109	A	G	0.195642	SLC11A1	TRUE	reported	igd	0.0389834227347512	1168.26556515367
219234580	1.10129e-93	0.0380815	31197	2	0.781912	eqtl-a-ENSG00000018280	rs111995121	G	T	0.024309	SLC11A1	TRUE	reported	igd	0.0133335317541944	421.560412214669
219270097	4.61424e-13	0.0365162	8144	2	0.264239	eqtl-a-ENSG00000018280	rs12472559	G	A	0.0272076	SLC11A1	TRUE	reported	igd	0.00638853837278896	52.3499188969332
103434253	4.76672e-08	0.0127393	31569	4	-0.0695526	eqtl-a-ENSG00000018280	rs3774937	C	T	0.320593	SLC11A1	TRUE	reported	igd	0.000943332736362924	29.8063017489581
148200011	4.59272e-08	0.0120545	31569	5	-0.0658972	eqtl-a-ENSG00000018280	rs56330463	C	T	0.582097	SLC11A1	TRUE	reported	igd	0.000945722625187816	29.8818860850577
144385777	1.43747e-59	0.026411	25735	6	0.429892	eqtl-a-ENSG00000018280	rs149110519	T	C	0.0526158	SLC11A1	TRUE	reported	igd	0.0101900584476895	264.920327657203
50370254	1.95569e-13	0.0166498	30077	7	-0.122404	eqtl-a-ENSG00000018280	rs149007767	T	C	0.149708	SLC11A1	TRUE	reported	igd	0.00179373776818741	54.0436034308393
28724374	2.32595e-14	0.0131003	31355	7	-0.0999713	eqtl-a-ENSG00000018280	rs56388170	T	G	0.289189	SLC11A1	TRUE	reported	igd	0.00185385398940569	58.2318374540112
61679038	7.76784e-14	0.014479	31569	8	-0.10822	eqtl-a-ENSG00000018280	rs13277976	T	A	0.785822	SLC11A1	TRUE	reported	igd	0.00176648212027895	55.8612189353118
32910246	3.58831e-08	0.0304712	29141	2	0.167899	eqtl-a-ENSG00000018699	rs112802653	G	A	0.039641	TTC27	TRUE	reported	igd	0.00104078352929417	30.3589883951905
32955837	1.57181e-39	0.0132104	30847	2	-0.173797	eqtl-a-ENSG00000018699	rs3818265	T	C	0.722435	TTC27	TRUE	reported	igd	0.00557968484977299	173.071061169188
32875084	1e-200	0.01728	31172	2	-0.578877	eqtl-a-ENSG00000018699	rs34549288	C	T	0.125694	TTC27	TRUE	reported	igd	0.0347504206569161	1122.16636511071
56849749	1.28617e-59	0.0121369	31684	3	0.197632	eqtl-a-ENSG00000019102	rs1354034	C	T	0.618137	VSIG2	TRUE	reported	igd	0.0082992646666299	265.137751541325
65066186	2.01002e-12	0.0120346	31684	10	0.0846487	eqtl-a-ENSG00000019102	rs10761741	T	G	0.420816	VSIG2	TRUE	reported	igd	0.00155904857421473	49.4709044713523
124612828	2.59956e-29	0.0135422	31684	11	0.152212	eqtl-a-ENSG00000019102	rs12293621	C	A	0.258014	VSIG2	TRUE	reported	igd	0.00397146841050812	126.325760950768
33976619	1.26299e-08	0.0251996	31569	17	0.143416	eqtl-a-ENSG00000019102	rs9915021	T	C	0.0591544	VSIG2	TRUE	reported	igd	0.00102494776810024	32.387721918915
92753336	1.40152e-27	0.0428489	21629	1	-0.466286	eqtl-a-ENSG00000019169	rs141094656	C	T	0.0195137	MARCO	TRUE	reported	igd	0.00544524787043222	118.409142826654
8445160	2.48428e-12	0.0118837	31569	2	-0.0832371	eqtl-a-ENSG00000019169	rs2630709	T	A	0.493998	MARCO	TRUE	reported	igd	0.00155165547648597	49.0572283432527
118882408	1.19152e-25	0.0345163	27980	2	-0.361365	eqtl-a-ENSG00000019169	rs72839635	T	C	0.03043	MARCO	TRUE	reported	igd	0.00390209662319548	109.600531186406
119530425	1.27614e-62	0.0206241	31180	2	-0.344451	eqtl-a-ENSG00000019169	rs72834477	T	C	0.0897146	MARCO	TRUE	reported	igd	0.00886667633702106	278.918313243642
119614709	1.8992e-09	0.0364331	3252	2	0.218824	eqtl-a-ENSG00000019169	rs185273710	A	G	0.0273678	MARCO	TRUE	reported	igd	0.0109712480323421	36.0520925546133
119637357	1e-200	0.0170289	29902	2	-0.621571	eqtl-a-ENSG00000019169	rs12998257	G	C	0.128006	MARCO	TRUE	reported	igd	0.0426556193927915	1332.23012082186
119745127	2.4322e-158	0.0320114	26894	2	-0.858242	eqtl-a-ENSG00000019169	rs11904650	G	A	0.0340529	MARCO	TRUE	reported	igd	0.0260315296639658	718.750059210688
43721508	4.26285e-22	0.0119986	31300	2	-0.115962	eqtl-a-ENSG00000019169	rs12478601	T	C	0.574604	MARCO	TRUE	reported	igd	0.00297530724713601	93.3990571123648
119785661	9.68501e-57	0.0246125	30077	2	-0.390682	eqtl-a-ENSG00000019169	rs66583010	T	C	0.0611951	MARCO	TRUE	reported	igd	0.00830764245169869	251.945419194852
119861725	3.08177e-11	0.0434131	25754	2	0.288376	eqtl-a-ENSG00000019169	rs79321128	A	G	0.0191015	MARCO	TRUE	reported	igd	0.00171036381914661	44.1207516078872
188135783	3.88866e-17	0.0118758	31240	3	0.0999475	eqtl-a-ENSG00000019169	rs12485444	A	T	0.509196	MARCO	TRUE	reported	igd	0.00226216114552272	70.8256088041834
50370254	5.95525e-18	0.0166377	30077	7	-0.143639	eqtl-a-ENSG00000019169	rs149007767	T	C	0.149708	MARCO	TRUE	reported	igd	0.00247200159173244	74.5296853722246
136921464	1.31826e-11	0.0126139	23876	9	-0.0853519	eqtl-a-ENSG00000019169	rs2157770	G	A	0.332411	MARCO	TRUE	reported	igd	0.00191396515986963	45.7816286689621
45414183	4.99574e-13	0.0118857	31256	11	0.0858765	eqtl-a-ENSG00000019485	rs1545466	A	G	0.51321	PRDM11	TRUE	reported	igd	0.00166740460297289	52.2001021519184
45228847	1.13423e-28	0.0121042	31254	11	0.134467	eqtl-a-ENSG00000019485	rs2863165	A	T	0.398422	PRDM11	TRUE	reported	igd	0.0039331646020659	123.404630869631
45121892	2.03991e-09	0.0137398	31255	11	0.082366	eqtl-a-ENSG00000019485	rs12363092	T	G	0.24933	PRDM11	TRUE	reported	igd	0.00114846183730948	35.9341467976865
43721508	3.03159e-08	0.0120252	31086	2	0.0666135	eqtl-a-ENSG00000019582	rs12478601	T	C	0.574604	CD74	TRUE	reported	igd	0.000986158114133684	30.6839980934253
38062196	8.53749e-10	0.0119728	31086	17	-0.0734472	eqtl-a-ENSG00000019582	rs2305480	A	G	0.440477	CD74	TRUE	reported	igd	0.00120911820038622	37.6297289309312
44747947	2.70782e-09	0.0136704	31086	20	-0.0813184	eqtl-a-ENSG00000019582	rs4810485	G	T	0.746826	CD74	TRUE	reported	igd	0.0011369890799875	35.3823979624384
126598533	1e-200	0.0184392	27816	10	0.932702	eqtl-a-ENSG00000019995	rs190117883	T	C	0.097753	ZRANB1	TRUE	reported	igd	0.0842347245833573	2558.41173765358
126720445	5.22998e-12	0.0270892	31240	10	-0.186893	eqtl-a-ENSG00000019995	rs76798703	G	C	0.0506784	ZRANB1	TRUE	reported	igd	0.00152132317443757	47.5955014624546
126556677	1.4481e-08	0.0263312	27069	10	-0.149235	eqtl-a-ENSG00000019995	rs117385447	T	C	0.0538783	ZRANB1	TRUE	reported	igd	0.00118525776161752	32.1194416512172
33946107	3.99209e-08	0.0119764	31355	17	-0.0657647	eqtl-a-ENSG00000019995	rs225245	G	A	0.440335	ZRANB1	TRUE	reported	igd	0.000960746583757859	30.1512553561396
93225709	1.71317e-11	0.0123486	26609	11	0.0830866	eqtl-a-ENSG00000020922	rs2658762	G	A	0.6358	MRE11	TRUE	reported	igd	0.00169847715162055	45.2682686932368
94071745	1e-200	0.0117618	26483	11	0.406938	eqtl-a-ENSG00000020922	rs598645	T	A	0.618151	MRE11	TRUE	reported	igd	0.0432456259764027	1196.95028585558
94167257	1e-200	0.011428	26494	11	0.500156	eqtl-a-ENSG00000020922	rs518276	A	G	0.394297	MRE11	TRUE	reported	igd	0.0674229418623785	1915.30400649696
94332731	5.09214e-25	0.0154406	26609	11	0.15952	eqtl-a-ENSG00000020922	rs476209	T	G	0.179789	MRE11	TRUE	reported	igd	0.00399516600724129	106.725769119552
94528954	1.39637e-12	0.0218498	24061	11	-0.15479	eqtl-a-ENSG00000020922	rs77097586	T	C	0.0803998	MRE11	TRUE	reported	igd	0.00208148017016863	50.1827858877963
32412435	4.52939e-09	0.0164249	29827	6	0.0963088	eqtl-a-ENSG00000021300	rs3177928	A	G	0.155018	PLEKHB1	TRUE	reported	igd	0.00115137442161123	34.3793256006838
90880393	2.81222e-09	0.0155796	28288	6	-0.0925774	eqtl-a-ENSG00000021300	rs10944479	A	G	0.176852	PLEKHB1	TRUE	reported	igd	0.00124667527891412	35.3074738942298
28172739	7.05716e-10	0.0137217	31569	7	-0.0845887	eqtl-a-ENSG00000021300	rs917116	G	T	0.250264	PLEKHB1	TRUE	reported	igd	0.00120233517892027	37.9998030930268
73366751	5.8479e-177	0.0168957	31684	11	0.479207	eqtl-a-ENSG00000021300	rs3741147	G	T	0.135856	PLEKHB1	TRUE	reported	igd	0.0247608222536827	804.389721559396
73913949	4.65908e-12	0.0358292	29084	11	0.24778	eqtl-a-ENSG00000021300	rs2851712	A	G	0.971698	PLEKHB1	TRUE	reported	igd	0.00164168782286941	47.8220741815363
74148731	7.56833e-09	0.0431891	20966	11	-0.249538	eqtl-a-ENSG00000021300	rs78735409	A	G	0.0193191	PLEKHB1	TRUE	reported	igd	0.00158971231187658	33.3797931743578
73462481	2.44174e-26	0.0397089	27721	11	-0.421649	eqtl-a-ENSG00000021300	rs117793089	A	G	0.0228076	PLEKHB1	TRUE	reported	igd	0.00405092939712514	112.744431691614
73729769	3.05281e-19	0.0239684	29253	11	-0.214915	eqtl-a-ENSG00000021300	rs111505943	C	T	0.0656175	PLEKHB1	TRUE	reported	igd	0.00274089858062251	80.394377216191
2774052	1.01625e-19	0.012855	31684	6	0.116817	eqtl-a-ENSG00000021355	rs160666	C	A	0.307941	SERPINB1	TRUE	reported	igd	0.00259954591541354	82.5734672115429
2910529	2.06919e-39	0.0181452	31562	6	-0.238339	eqtl-a-ENSG00000021355	rs6915667	G	A	0.120908	SERPINB1	TRUE	reported	igd	0.0054366906833233	172.519895273002
2833739	1e-200	0.0126272	31355	6	-0.490809	eqtl-a-ENSG00000021355	rs15286	G	A	0.72207	SERPINB1	TRUE	reported	igd	0.0459691557665707	1510.71734154189
2572650	2.01159e-08	0.0131427	31565	6	-0.0737426	eqtl-a-ENSG00000021355	rs9378712	G	T	0.286976	SERPINB1	TRUE	reported	igd	0.000996389097008523	31.4803957920167
38128648	3.90454e-10	0.0119343	31684	17	0.0746835	eqtl-a-ENSG00000021355	rs3859192	T	C	0.455547	SERPINB1	TRUE	reported	igd	0.00123446552683631	39.1586768578854
33289114	4.8643e-08	0.0465954	6735	19	-0.254229	eqtl-a-ENSG00000021488	rs150688658	G	A	0.0165553	SLC7A9	TRUE	reported	igd	0.00440059214621431	29.7601491992975
33349179	1e-200	0.0171806	30859	19	0.521175	eqtl-a-ENSG00000021488	rs17238865	A	G	0.129411	SLC7A9	TRUE	reported	igd	0.0289565820148096	920.157878300564
33483562	4.64836e-13	0.029678	30399	19	0.214729	eqtl-a-ENSG00000021488	rs7252338	G	A	0.041818	SLC7A9	TRUE	reported	igd	0.00171911764926329	52.3460081311027
33125043	2.18927e-26	0.0227519	30077	19	-0.241823	eqtl-a-ENSG00000021488	rs73030677	C	T	0.0732541	SLC7A9	TRUE	reported	igd	0.00374194327403101	112.961640015562
33338073	5.48277e-113	0.0171581	26996	19	0.387594	eqtl-a-ENSG00000021488	rs11667586	C	T	0.134111	SLC7A9	TRUE	reported	igd	0.01855169986039	510.250602054261
3169388	3.35429e-39	0.0451029	14141	11	-0.59078	eqtl-a-ENSG00000021762	rs11605446	A	G	0.0175108	OSBPL5	TRUE	reported	igd	0.0119873999717862	171.546241612956
3102918	2.92954e-14	0.0147129	30688	11	0.11184	eqtl-a-ENSG00000021762	rs7933398	G	C	0.204999	OSBPL5	TRUE	reported	igd	0.0018793695981497	57.7789234409504
3261390	8.56841e-21	0.0125475	31352	11	-0.117348	eqtl-a-ENSG00000021762	rs11026100	C	G	0.337549	OSBPL5	TRUE	reported	igd	0.0027820300781107	87.4599591858558
3142477	1e-200	0.0117677	22995	11	0.383982	eqtl-a-ENSG00000021762	rs2056423	A	G	0.38982	OSBPL5	TRUE	reported	igd	0.0442535227942377	1064.63510342486
61650831	1.25849e-08	0.0155299	25575	8	0.0883929	eqtl-a-ENSG00000022277	rs7846314	T	A	0.178349	RTF2	TRUE	reported	igd	0.00126512087341341	32.3939183180369
55101530	2.83988e-100	0.0118866	21162	20	0.252675	eqtl-a-ENSG00000022277	rs11086548	G	A	0.415946	RTF2	TRUE	reported	igd	0.0209062820875651	451.822865247351
54986375	7.37564e-11	0.0144617	24083	20	0.0941876	eqtl-a-ENSG00000022277	rs3761207	A	G	0.215163	RTF2	TRUE	reported	igd	0.0017582228549599	42.4143384294941
55545662	4.24893e-10	0.0409279	15509	19	-0.255574	eqtl-a-ENSG00000022556	rs148656985	C	T	0.0215533	NLRP2	TRUE	reported	igd	0.00250795685581606	38.9886688625125
55600990	9.13692e-19	0.0223229	19406	19	-0.197448	eqtl-a-ENSG00000022556	rs55650192	A	G	0.0765555	NLRP2	TRUE	reported	igd	0.00401532662788991	78.2275068789804
55482235	1e-200	0.0139825	26032	19	0.42524	eqtl-a-ENSG00000022556	rs35450746	C	T	0.217231	NLRP2	TRUE	reported	igd	0.0343106136523903	924.836998312248
55455390	1e-200	0.0186168	26403	19	0.578572	eqtl-a-ENSG00000022556	rs59357040	A	G	0.10714	NLRP2	TRUE	reported	igd	0.0352897338055534	965.765883134724
55480518	5.53605e-14	0.0475679	7353	19	-0.357639	eqtl-a-ENSG00000022556	rs35242182	C	T	0.0158439	NLRP2	TRUE	reported	igd	0.00762906396979832	56.5123858487132
179126090	3.50938e-09	0.0119039	30842	5	0.0702995	eqtl-a-ENSG00000022567	rs1134924	T	C	0.525141	SLC45A4	TRUE	reported	igd	0.00112951650047726	34.8736792708876
42515791	1.76799e-09	0.0146003	27510	6	0.0878615	eqtl-a-ENSG00000022567	rs16895831	T	C	0.209742	SLC45A4	TRUE	reported	igd	0.00131465486935201	36.2111312862052
144385777	5.19039e-15	0.0266002	25462	6	-0.208069	eqtl-a-ENSG00000022567	rs149110519	T	C	0.0526158	SLC45A4	TRUE	reported	igd	0.00239723211667358	61.1801928136265
142081259	2.3465e-09	0.0119638	26304	8	0.0714469	eqtl-a-ENSG00000022567	rs2063386	G	A	0.44397	SLC45A4	TRUE	reported	igd	0.00135399874847514	35.6611602487391
142236438	6.56448e-25	0.0122814	26633	8	0.126583	eqtl-a-ENSG00000022567	rs12544261	A	C	0.369988	SLC45A4	TRUE	reported	igd	0.00397288585564031	106.223938805568
142459474	3.87614e-49	0.0122088	31244	8	-0.179887	eqtl-a-ENSG00000022567	rs13267647	T	G	0.373726	SLC45A4	TRUE	reported	igd	0.00690048695572006	217.082991823996
142286963	6.50279e-46	0.0429195	26897	8	0.610491	eqtl-a-ENSG00000022567	rs141832319	T	C	0.019332	SLC45A4	TRUE	reported	igd	0.00746604757274301	202.309804090697
142306200	1e-200	0.0159885	27421	8	-0.509868	eqtl-a-ENSG00000022567	rs34510023	C	T	0.152522	SLC45A4	TRUE	reported	igd	0.0357603504529284	1016.87692424743
139839423	6.96354e-09	0.0118894	30971	6	-0.0688623	eqtl-a-ENSG00000022840	rs643381	A	C	0.501255	RNF10	TRUE	reported	igd	0.0010819764103105	33.5440212906493
30128442	6.45967e-09	0.0235911	26412	6	-0.13693	eqtl-a-ENSG00000022840	rs12212092	T	C	0.068141	RNF10	TRUE	reported	igd	0.00127393107269666	33.6874351002526
50427982	3.22478e-16	0.0119364	31684	7	0.0974563	eqtl-a-ENSG00000022840	rs6592965	A	G	0.449532	RNF10	TRUE	reported	igd	0.00209952154832307	66.6569894797306
120878530	1e-200	0.0121936	31669	12	0.379209	eqtl-a-ENSG00000022840	rs8903	C	T	0.664417	RNF10	TRUE	reported	igd	0.0296342865938184	967.087913970465
121627748	8.46447e-13	0.0178992	31567	12	0.12804	eqtl-a-ENSG00000022840	rs75268007	G	C	0.126057	RNF10	TRUE	reported	igd	0.00161840549844125	51.1677797744279
33875262	1.18032e-200	0.0125198	31185	17	0.378388	eqtl-a-ENSG00000022840	rs8073060	A	T	0.305723	RNF10	TRUE	reported	igd	0.0284574514966854	913.381211546717
4502201	1.72465e-11	0.0119223	27399	19	0.0802087	eqtl-a-ENSG00000022840	rs8887	C	T	0.539821	RNF10	TRUE	reported	igd	0.00164919239960155	45.2575626001484
4157072	6.69885e-71	0.0122165	31569	20	-0.217489	eqtl-a-ENSG00000022840	rs6084653	G	C	0.36636	RNF10	TRUE	reported	igd	0.00993989348276466	316.922796408997
55991637	2.20689e-09	0.0118907	26332	20	0.071129	eqtl-a-ENSG00000022840	rs6014993	G	A	0.490224	RNF10	TRUE	reported	igd	0.00135707841688691	35.7804315680604
43116830	1.1207e-09	0.0127838	31644	5	0.0778662	eqtl-a-ENSG00000022976	rs1532331	T	G	0.683885	ZNF839	TRUE	reported	igd	0.00117105628577242	37.0980068485206
102360916	2.26511e-10	0.0186961	31643	14	-0.118573	eqtl-a-ENSG00000022976	rs2251246	A	G	0.114063	ZNF839	TRUE	reported	igd	0.00126952197731877	40.2200050647008
102866362	9.33684e-24	0.0134528	26379	14	-0.13518	eqtl-a-ENSG00000022976	rs11626217	A	G	0.735921	ZNF839	TRUE	reported	igd	0.00381313338052239	100.964008408734
123297570	2.19533e-62	0.0157749	25738	11	-0.262953	eqtl-a-ENSG00000023171	rs10893036	A	G	0.167737	GRAMD1B	TRUE	reported	igd	0.0106803350119276	277.836488644227
123280309	1.99756e-19	0.0195633	26196	11	0.176336	eqtl-a-ENSG00000023171	rs2282561	T	C	0.10254	GRAMD1B	TRUE	reported	igd	0.00309184637391792	81.2390024335008
123330774	6.89763e-98	0.0148475	25751	11	0.311765	eqtl-a-ENSG00000023171	rs55837399	T	A	0.193113	GRAMD1B	TRUE	reported	igd	0.0168337514373454	440.874
123355391	2.31686e-94	0.0145061	26079	11	0.298945	eqtl-a-ENSG00000023171	rs35923643	G	A	0.20576	GRAMD1B	TRUE	reported	igd	0.0160241411982396	424.666445105012
56849749	8.47149e-09	0.012236	30721	3	-0.070467	eqtl-a-ENSG00000023892	rs1354034	C	T	0.618137	DEF6	TRUE	reported	igd	0.00107842184095846	33.1638051041564
35748253	2.36646e-12	0.0125291	30605	6	-0.0878417	eqtl-a-ENSG00000023892	rs1326757	C	A	0.658514	DEF6	TRUE	reported	igd	0.00160351258818789	49.1511101601792
35536195	3.18787e-16	0.0128389	29939	6	0.104841	eqtl-a-ENSG00000023892	rs6457834	A	C	0.690034	DEF6	TRUE	reported	igd	0.00222230252116171	66.6772475914446
34988391	1e-200	0.013335	30383	6	0.414313	eqtl-a-ENSG00000023892	rs2689089	A	C	0.752084	DEF6	TRUE	reported	igd	0.0307933413625326	965.255960220387
34416441	3.52128e-13	0.0170194	30721	6	0.123782	eqtl-a-ENSG00000023892	rs34307089	C	T	0.142001	DEF6	TRUE	reported	igd	0.00171887387975355	52.893003113623
35408341	3.38065e-76	0.032312	30275	6	-0.596905	eqtl-a-ENSG00000023892	rs10947546	A	G	0.0343042	DEF6	TRUE	reported	igd	0.0111462978812432	341.235387030335
150003189	4.28154e-77	0.0241339	25827	1	0.44852	eqtl-a-ENSG00000023902	rs16833244	G	C	0.0633833	PLEKHO1	TRUE	reported	igd	0.0131966968757965	345.36233891644
56849749	1.32739e-10	0.0122325	26609	3	0.0785802	eqtl-a-ENSG00000023902	rs1354034	C	T	0.618137	PLEKHO1	TRUE	reported	igd	0.00154843955665919	41.2632248936917
144385777	1.64135e-12	0.0266108	20660	6	-0.187923	eqtl-a-ENSG00000023902	rs149110519	T	C	0.0526158	PLEKHO1	TRUE	reported	igd	0.00240805625312186	49.8657055009393
35572163	3.24265e-12	0.0197364	25090	14	-0.137498	eqtl-a-ENSG00000023902	rs111778408	A	G	0.100785	PLEKHO1	TRUE	reported	igd	0.0019307094266655	48.5313380079648
144385777	3.90301e-14	0.0266039	10586	6	-0.201237	eqtl-a-ENSG00000024048	rs149110519	T	C	0.0526158	UBR2	TRUE	reported	igd	0.00537591184507462	57.206186383259
42518706	1.60879e-18	0.0132045	14262	6	-0.115961	eqtl-a-ENSG00000024048	rs9381192	A	G	0.718957	UBR2	TRUE	reported	igd	0.00537845343477044	77.1114865193567
42537608	4.97622e-60	0.0274459	14261	6	-0.448512	eqtl-a-ENSG00000024048	rs12191298	G	A	0.0485052	UBR2	TRUE	reported	igd	0.018381707206174	267.012916300538
50370254	2.61156e-15	0.0166448	13100	7	0.13163	eqtl-a-ENSG00000024048	rs149007767	T	C	0.149708	UBR2	TRUE	reported	igd	0.0047513051253692	62.5296921790238
139100194	7.06318e-157	0.012431	31683	6	0.331719	eqtl-a-ENSG00000024862	rs6915060	C	T	0.321745	CCDC28A	TRUE	reported	igd	0.0219811044656422	712.034679243626
138908551	3.6166e-13	0.0148624	31481	6	-0.108035	eqtl-a-ENSG00000024862	rs9385834	A	T	0.199614	CCDC28A	TRUE	reported	igd	0.0016756149303556	52.835213865866
99144154	1.0266e-26	0.0129666	31569	10	-0.138731	eqtl-a-ENSG00000024862	rs11189181	G	A	0.297492	CCDC28A	TRUE	reported	igd	0.00361295086205823	114.463571120546
148200011	4.94538e-09	0.0120527	31569	5	0.0704949	eqtl-a-ENSG00000025039	rs56330463	C	T	0.582097	RRAGD	TRUE	reported	igd	0.00108246911494871	34.2073309308232
90020448	1e-200	0.0142362	31683	6	0.447276	eqtl-a-ENSG00000025039	rs3822872	C	T	0.205652	RRAGD	TRUE	reported	igd	0.030214298042241	987.041956118601
89696501	3.84946e-17	0.011899	30902	6	-0.100157	eqtl-a-ENSG00000025039	rs4707512	G	A	0.467437	RRAGD	TRUE	reported	igd	0.00228749689266407	70.8457133324262
90296811	2.99916e-119	0.0170327	31227	6	-0.395468	eqtl-a-ENSG00000025039	rs4593337	G	A	0.863854	RRAGD	TRUE	reported	igd	0.0169703982169241	539.048552924845
89263474	1.50491e-08	0.0121417	31682	6	-0.0687339	eqtl-a-ENSG00000025039	rs9444630	G	A	0.39873	RRAGD	TRUE	reported	igd	0.00101048836282117	32.0446520821943
122345048	2.52116e-25	0.0502597	24803	6	-0.522615	eqtl-a-ENSG00000025156	rs139360283	T	C	0.0141159	HSF2	TRUE	reported	igd	0.00434040870413264	108.115742782219
123005700	1.47877e-17	0.0144871	30941	6	0.123559	eqtl-a-ENSG00000025156	rs12196116	G	A	0.213497	HSF2	TRUE	reported	igd	0.00234547972163963	72.737401207345
122378500	1.1392e-64	0.0265796	30757	6	-0.45134	eqtl-a-ENSG00000025156	rs12665320	T	G	0.0518227	HSF2	TRUE	reported	igd	0.0092878307403858	288.325149608324
122709984	1e-200	0.012682	31470	6	0.384436	eqtl-a-ENSG00000025156	rs530928	T	C	0.292119	HSF2	TRUE	reported	igd	0.0283711068836621	918.850805837636
47077699	4.32414e-23	0.0376715	13013	11	-0.372801	eqtl-a-ENSG00000025434	rs113083342	G	A	0.0254361	NR1H3	TRUE	reported	igd	0.00746955480914628	97.9177798451455
47285353	1.53638e-23	0.0402646	24973	11	-0.40261	eqtl-a-ENSG00000025434	rs143506177	C	T	0.0221882	NR1H3	TRUE	reported	igd	0.0039876436959928	99.9741118695955
47353899	1.02754e-19	0.0337648	26278	11	-0.306784	eqtl-a-ENSG00000025434	rs11039186	T	C	0.0319088	NR1H3	TRUE	reported	igd	0.00313171706119748	82.5475129547046
47585758	1.3135e-10	0.0380687	19297	11	0.244622	eqtl-a-ENSG00000025434	rs191300557	A	G	0.0249965	NR1H3	TRUE	reported	igd	0.00213519155043858	41.2866759272981
47359954	4.7687e-11	0.0485246	3086	11	-0.319185	eqtl-a-ENSG00000025434	rs3729949	T	C	0.0152301	NR1H3	TRUE	reported	igd	0.0138266936414766	43.2393808627503
48059091	1.38038e-105	0.016885	31569	11	-0.368493	eqtl-a-ENSG00000025434	rs61914719	T	C	0.139711	NR1H3	TRUE	reported	igd	0.0148625172957959	476.243257122378
46441384	1.11096e-13	0.0375901	25482	11	-0.279182	eqtl-a-ENSG00000025434	rs140502323	A	G	0.0256285	NR1H3	TRUE	reported	igd	0.00216000750847126	55.1561289685579
46370636	1e-200	0.0337759	26376	11	1.15979	eqtl-a-ENSG00000025434	rs61882680	T	C	0.0295291	NR1H3	TRUE	reported	igd	0.042790081654159	1178.9949016586
51080760	1.99067e-44	0.0237887	22543	22	-0.332628	eqtl-a-ENSG00000025708	rs134774	G	A	0.933888	TYMP	TRUE	reported	igd	0.00859833031609188	195.49590199583
50651785	4.4761e-18	0.0195813	19634	22	0.169692	eqtl-a-ENSG00000025708	rs73187263	T	C	0.102378	TYMP	TRUE	reported	igd	0.0038104204751415	75.092308036044
50835954	6.93905e-16	0.0400523	20813	22	-0.323282	eqtl-a-ENSG00000025708	rs56211323	G	A	0.0224859	TYMP	TRUE	reported	igd	0.00312044213642126	65.1427956254167
50935082	1e-200	0.0116358	14198	22	0.417931	eqtl-a-ENSG00000025708	rs134970	C	T	0.601374	TYMP	TRUE	reported	igd	0.0832950302907956	1289.89837415546
50928876	3.12464e-20	0.0359315	13738	22	-0.331094	eqtl-a-ENSG00000025708	rs56235139	A	G	0.0280605	TYMP	TRUE	reported	igd	0.00614260357309944	84.8962869154436
43435386	1e-200	0.0127084	31341	20	-0.440191	eqtl-a-ENSG00000025772	rs1555303	G	A	0.281257	TOMM34	TRUE	reported	igd	0.036869958264804	1199.70053055242
43589633	1e-200	0.010919	30406	20	-0.566283	eqtl-a-ENSG00000025772	rs2180292	G	C	0.479018	TOMM34	TRUE	reported	igd	0.0812699421272217	2689.50743394336
43370519	8.85727e-62	0.011957	31564	20	-0.198313	eqtl-a-ENSG00000025772	rs34485448	G	T	0.416513	TOMM34	TRUE	reported	igd	0.00863967507677934	275.061869955738
44459142	1.54703e-12	0.0333941	29140	20	-0.236099	eqtl-a-ENSG00000025772	rs147793637	C	T	0.0327239	TOMM34	TRUE	reported	igd	0.00171243825480079	49.9826180155504
182323766	2.16441e-10	0.0119885	14263	2	0.0761151	eqtl-a-ENSG00000026025	rs1375493	A	G	0.565077	VIM	TRUE	reported	igd	0.00281822329511434	40.3042688409657
127009395	2.08209e-13	0.0158204	14263	9	-0.116173	eqtl-a-ENSG00000026025	rs55793580	T	C	0.169838	VIM	TRUE	reported	igd	0.00376639439239681	53.9156179109333
17015144	2.27353e-32	0.0124749	14263	10	0.147769	eqtl-a-ENSG00000026025	rs2932908	A	G	0.656902	VIM	TRUE	reported	igd	0.0097415973908564	140.291584524769
17281756	2.84708e-73	0.0133396	14247	10	0.241527	eqtl-a-ENSG00000026025	rs165530	C	A	0.735479	VIM	TRUE	reported	igd	0.0224927381829955	327.78176483435
17143000	1.75711e-09	0.0128936	14263	10	-0.0776027	eqtl-a-ENSG00000026025	rs12261966	T	C	0.306438	VIM	TRUE	reported	igd	0.00253333594749561	36.2196605152242
111833788	1.28233e-13	0.0119159	11496	12	0.0882755	eqtl-a-ENSG00000026025	rs10774624	A	G	0.538565	VIM	TRUE	reported	igd	0.00475129001984882	54.872040466379
50370254	5.60531e-14	0.0166483	29328	7	0.125149	eqtl-a-ENSG00000026103	rs149007767	T	C	0.149708	FAS	TRUE	reported	igd	0.00192307644271783	56.5048028143358
28724374	1.11096e-13	0.0131018	30606	7	0.0973068	eqtl-a-ENSG00000026103	rs56388170	T	G	0.289189	FAS	TRUE	reported	igd	0.00179901949027796	55.1564199549796
90741615	1e-200	0.0113413	30817	10	-0.444004	eqtl-a-ENSG00000026103	rs7082101	A	C	0.460288	FAS	TRUE	reported	igd	0.0473781676504179	1532.56852464396
90714791	2.13157e-12	0.0118908	25316	10	0.0835399	eqtl-a-ENSG00000026103	rs7095848	A	G	0.51839	FAS	TRUE	reported	igd	0.00194591892154866	49.3550324716431
90777663	2.81125e-36	0.0133084	30820	10	0.167387	eqtl-a-ENSG00000026103	rs11202926	C	T	0.271495	FAS	TRUE	reported	igd	0.00510664486113196	158.184372744552
167500562	1e-200	0.0105432	26609	6	0.660255	eqtl-a-ENSG00000026297	rs204295	T	C	0.475178	RNASET2	TRUE	reported	igd	0.128452101559866	3921.44261069332
167264780	1.64771e-09	0.0469329	10732	6	0.282977	eqtl-a-ENSG00000026297	rs118051809	T	C	0.0163064	RNASET2	TRUE	reported	igd	0.00337596695825109	36.3468311630779
167630830	9.14956e-24	0.0493459	17566	6	0.495946	eqtl-a-ENSG00000026297	rs17617310	C	T	0.014659	RNASET2	TRUE	reported	igd	0.00571746569228882	100.999025884812
167345772	1e-200	0.0118675	26280	6	0.507935	eqtl-a-ENSG00000026297	rs62436418	C	T	0.334551	RNASET2	TRUE	reported	igd	0.0651640183616374	1831.74386538486
167818102	3.92013e-19	0.0119022	26609	6	-0.106398	eqtl-a-ENSG00000026297	rs4235920	C	T	0.536773	RNASET2	TRUE	reported	igd	0.00299420527035335	79.9060748186467
182323766	8.09841e-17	0.0119762	31569	2	0.0997595	eqtl-a-ENSG00000026508	rs1375493	A	G	0.565077	CD44	TRUE	reported	igd	0.00219308836215058	69.3813798246508
34702158	2.55971e-09	0.018303	31682	11	0.109042	eqtl-a-ENSG00000026508	rs286873	T	G	0.119837	CD44	TRUE	reported	igd	0.00111903637702992	35.4907879070253
35129172	1.77296e-33	0.011872	31346	11	-0.143147	eqtl-a-ENSG00000026508	rs507230	A	G	0.535153	CD44	TRUE	reported	igd	0.00461662902233168	145.374761418644
35250518	6.24022e-60	0.0121706	31563	11	-0.198721	eqtl-a-ENSG00000026508	rs927335	T	A	0.376359	CD44	TRUE	reported	igd	0.008375916521027	266.58519667321
182323766	9.18967e-17	0.0119763	31569	2	0.0995796	eqtl-a-ENSG00000026652	rs1375493	A	G	0.565077	AGPAT4	TRUE	reported	igd	0.00218516659584665	69.1302149676021
161657657	3.49189e-10	0.0394845	28527	6	-0.247765	eqtl-a-ENSG00000026652	rs112049074	T	C	0.0231963	AGPAT4	TRUE	reported	igd	0.00137838800877301	39.3727889303838
161694612	2.68349e-19	0.0170769	30817	6	0.153369	eqtl-a-ENSG00000026652	rs6914451	G	C	0.140529	AGPAT4	TRUE	reported	igd	0.00261054698620532	80.6545578929481
161566909	1.26212e-50	0.0172504	31684	6	0.258135	eqtl-a-ENSG00000026652	rs6455707	C	T	0.135556	AGPAT4	TRUE	reported	igd	0.00701773452210262	223.907186320443
127009395	2.40713e-12	0.0158231	31569	9	-0.110896	eqtl-a-ENSG00000026652	rs55793580	T	C	0.169838	AGPAT4	TRUE	reported	igd	0.00155350476320723	49.1157864683898
111904371	4.24424e-12	0.0119063	28417	12	0.0824988	eqtl-a-ENSG00000026652	rs4766578	A	T	0.531061	AGPAT4	TRUE	reported	igd	0.00168667055465033	48.0077170130712
26344975	1e-200	0.0114998	31684	6	0.462071	eqtl-a-ENSG00000026950	rs10946812	C	G	0.401857	BTN3A1	TRUE	reported	igd	0.048485540182819	1614.39363135607
26702788	5.45381e-31	0.016855	20879	6	0.195115	eqtl-a-ENSG00000026950	rs10946846	G	A	0.144356	BTN3A1	TRUE	reported	igd	0.00637728199124383	133.99302745212
25579846	6.99697e-09	0.012509	31568	6	0.0724398	eqtl-a-ENSG00000026950	rs3804122	G	A	0.344582	BTN3A1	TRUE	reported	igd	0.00106120945347682	33.5337239132763
111865049	7.24703e-10	0.0119211	28418	12	-0.0734409	eqtl-a-ENSG00000026950	rs7310615	G	C	0.537476	BTN3A1	TRUE	reported	igd	0.00133373696362939	37.9500849896163
57005479	1.90722e-20	0.0119625	31300	16	-0.11086	eqtl-a-ENSG00000026950	rs1532624	A	C	0.437102	BTN3A1	TRUE	reported	igd	0.00273634907402741	85.8772434344617
62015885	3.63756e-08	0.0248458	31568	14	-0.136841	eqtl-a-ENSG00000027075	rs76537762	A	G	0.0609784	PRKCH	TRUE	reported	igd	0.000959980311830261	30.3318565083033
61874448	4.47404e-20	0.0130328	31684	14	-0.11959	eqtl-a-ENSG00000027075	rs767755	A	G	0.706603	PRKCH	TRUE	reported	igd	0.0026504624538812	84.195107434921
61978571	3.39782e-13	0.0129155	29767	14	0.0939928	eqtl-a-ENSG00000027075	rs1088683	T	C	0.696055	PRKCH	TRUE	reported	igd	0.00177606819444773	52.9587281203696
173205318	1.08593e-16	0.0137052	31569	5	0.113683	eqtl-a-ENSG00000027697	rs2594836	A	G	0.749651	IFNGR1	TRUE	reported	igd	0.00217477309099282	68.8006880483799
137239438	2.50952e-10	0.0119582	31567	6	0.075651	eqtl-a-ENSG00000027697	rs9494599	G	C	0.554601	IFNGR1	TRUE	reported	igd	0.00126623450400656	40.0193660210513
137540335	6.62064e-68	0.0138938	28704	6	-0.241928	eqtl-a-ENSG00000027697	rs11754268	T	C	0.234754	IFNGR1	TRUE	reported	igd	0.0104526008093909	303.17956338072
28724374	7.81502e-09	0.0131119	31355	7	0.0756882	eqtl-a-ENSG00000027697	rs56388170	T	G	0.289189	IFNGR1	TRUE	reported	igd	0.00106159045377299	33.3194170722338
16170764	5.27679e-09	0.0118969	31569	17	0.0694576	eqtl-a-ENSG00000027697	rs7210990	A	C	0.481977	IFNGR1	TRUE	reported	igd	0.00107855534387406	34.0835
176988579	1.53674e-21	0.0396468	17184	5	-0.377929	eqtl-a-ENSG00000027847	rs143658086	T	C	0.0229168	B4GALT7	TRUE	reported	igd	0.00526004494441001	90.8559988723908
176997824	1e-200	0.0126899	27526	5	-0.407302	eqtl-a-ENSG00000027847	rs62398472	T	C	0.287894	B4GALT7	TRUE	reported	igd	0.0360758395017283	1030.11362007183
177473975	4.73456e-08	0.04135	26524	5	-0.225813	eqtl-a-ENSG00000027847	rs116276523	G	A	0.0211199	B4GALT7	TRUE	reported	igd	0.00112310355587664	29.8204439556047
12242458	2.81968e-76	0.0141151	31345	1	-0.260892	eqtl-a-ENSG00000028137	rs6697733	C	T	0.223582	TNFRSF1B	TRUE	reported	igd	0.0107814600678441	341.606317780512
156255456	3.13812e-10	0.0131353	31298	1	0.0826471	eqtl-a-ENSG00000028137	rs6684514	A	G	0.287248	TNFRSF1B	TRUE	reported	igd	0.00126330921728358	39.5865352990305
144385777	3.04411e-09	0.0266246	25735	6	0.157863	eqtl-a-ENSG00000028137	rs149110519	T	C	0.0526158	TNFRSF1B	TRUE	reported	igd	0.00136419822210102	35.1528683298029
28724374	1.6384e-08	0.0131125	31355	7	0.0740399	eqtl-a-ENSG00000028137	rs56388170	T	G	0.289189	TNFRSF1B	TRUE	reported	igd	0.00101580993165228	31.8810738985919
50428428	1.60214e-13	0.0123354	31185	7	0.0910168	eqtl-a-ENSG00000029534	rs12718597	A	C	0.365482	ANK1	TRUE	reported	igd	0.00174274312639909	54.4388318104496
41616478	5.31007e-19	0.0125468	31567	8	-0.111735	eqtl-a-ENSG00000029534	rs11989912	A	G	0.338027	ANK1	TRUE	reported	igd	0.00250604852939323	79.3021568839341
41509915	1.6308e-99	0.0117634	31566	8	0.249087	eqtl-a-ENSG00000029534	rs4736819	T	C	0.543505	ANK1	TRUE	reported	igd	0.0140052684098084	448.341434212576
33875262	1.96472e-22	0.0128753	31185	17	0.125453	eqtl-a-ENSG00000029534	rs8073060	A	T	0.305723	ANK1	TRUE	reported	igd	0.00303515924819803	94.9335091548343
155556797	1.47775e-20	0.0155952	31470	6	0.144952	eqtl-a-ENSG00000029639	rs56238103	T	C	0.175598	TFB1M	TRUE	reported	igd	0.0027376580638272	86.3851168642926
156021514	7.72325e-12	0.0430039	1926	6	-0.294297	eqtl-a-ENSG00000029639	rs138028287	C	T	0.0194704	TFB1M	TRUE	reported	igd	0.0237391718593312	46.7847990422207
155625104	2.37684e-165	0.0117645	31470	6	-0.32241	eqtl-a-ENSG00000029639	rs9371371	G	A	0.5836	TFB1M	TRUE	reported	igd	0.0233093596079702	751.004358810266
4717255	6.34498e-09	0.0451963	17206	17	-0.262473	eqtl-a-ENSG00000029725	rs62073600	C	T	0.0176101	RABEP1	TRUE	reported	igd	0.00195628961032929	33.7219764081922
4863626	7.37564e-14	0.0452221	19453	17	-0.338307	eqtl-a-ENSG00000029725	rs138742777	A	G	0.0175616	RABEP1	TRUE	reported	igd	0.00286870753972395	55.9597625479128
4958757	1e-200	0.0189343	30902	17	0.574702	eqtl-a-ENSG00000029725	rs56343966	T	C	0.103458	RABEP1	TRUE	reported	igd	0.0289495692592092	921.210332430561
5257792	2.16621e-56	0.0372816	31240	17	0.589904	eqtl-a-ENSG00000029725	rs78438561	G	T	0.0257023	RABEP1	TRUE	reported	igd	0.0079505267411075	250.348960443329
5175454	1e-200	0.0181124	31569	17	0.602905	eqtl-a-ENSG00000029725	rs57747791	T	A	0.112856	RABEP1	TRUE	reported	igd	0.0339080947328267	1107.94513502846
4858330	3.91562e-12	0.0417811	11879	17	-0.289961	eqtl-a-ENSG00000029725	rs192217367	G	A	0.0206496	RABEP1	TRUE	reported	igd	0.00403814825880244	48.1555
5270691	2.83988e-29	0.0429623	19561	17	-0.482544	eqtl-a-ENSG00000029725	rs150231236	C	T	0.019398	RABEP1	TRUE	reported	igd	0.00640790211291024	126.14045310237
33689629	1.66495e-37	0.0236945	14263	6	-0.303259	eqtl-a-ENSG00000030110	rs10947433	A	G	0.0668383	BAK1	TRUE	reported	igd	0.0113543448320018	163.783971337701
33893513	4.54674e-13	0.0304259	13432	6	-0.220235	eqtl-a-ENSG00000030110	rs2147428	G	T	0.9603	BAK1	TRUE	reported	igd	0.00388556662485991	52.386711830945
33895406	3.38844e-25	0.0345962	14263	6	0.358777	eqtl-a-ENSG00000030110	rs78117618	T	C	0.0302896	BAK1	TRUE	reported	igd	0.00748374765052187	107.530456041855
33463961	1e-200	0.0120743	14263	6	-0.409263	eqtl-a-ENSG00000030110	rs35144104	T	C	0.3409	BAK1	TRUE	reported	igd	0.0745461035896719	1148.73575811382
33411673	2.23409e-16	0.0464401	11159	6	0.381227	eqtl-a-ENSG00000030110	rs191549504	C	T	0.0166232	BAK1	TRUE	reported	igd	0.00600262167212422	67.3756807171367
43561780	4.87304e-20	0.011895	31240	2	-0.109038	eqtl-a-ENSG00000030582	rs7563201	A	G	0.466469	GRN	TRUE	reported	igd	0.00268255879928076	84.023168862909
43360065	9.44539e-09	0.0136513	26953	2	0.0783638	eqtl-a-ENSG00000030582	rs28498283	T	A	0.254318	GRN	TRUE	reported	igd	0.00122108306616081	32.9496439683858
144385777	1.25806e-14	0.0266018	25735	6	-0.205097	eqtl-a-ENSG00000030582	rs149110519	T	C	0.0526158	GRN	TRUE	reported	igd	0.00230446662715963	59.4378121712387
50370254	6.46696e-36	0.0165899	30077	7	-0.207559	eqtl-a-ENSG00000030582	rs149007767	T	C	0.149708	GRN	TRUE	reported	igd	0.00517734082666228	156.51887693356
42417164	3.01995e-122	0.0203497	28465	17	0.478479	eqtl-a-ENSG00000030582	rs114641762	A	C	0.0905088	GRN	TRUE	reported	igd	0.019052170682645	552.814245501211
42490912	1.97288e-11	0.0360798	27921	17	-0.24202	eqtl-a-ENSG00000030582	rs12451763	T	C	0.0279042	GRN	TRUE	reported	igd	0.00160895529924839	44.9928144269161
119023438	1.2697e-86	0.013749	26107	3	-0.27122	eqtl-a-ENSG00000031081	rs11914541	G	A	0.239931	ARHGAP31	TRUE	reported	igd	0.0146865117866083	389.106000045316
118738066	1.40314e-11	0.0281427	26108	3	-0.190172	eqtl-a-ENSG00000031081	rs76136755	C	T	0.0467688	ARHGAP31	TRUE	reported	igd	0.00174593916435294	45.6592060206025
119252208	2.58488e-09	0.0157559	26100	3	-0.0938406	eqtl-a-ENSG00000031081	rs34844599	C	T	0.171877	ARHGAP31	TRUE	reported	igd	0.00135726534295571	35.4700531943717
50225824	1.5729e-11	0.0306403	30546	6	-0.20654	eqtl-a-ENSG00000031691	rs78140402	C	A	0.0391426	CENPQ	TRUE	reported	igd	0.00148532818533773	45.4353504996636
49522865	2.60735e-12	0.0130699	31684	6	0.0914566	eqtl-a-ENSG00000031691	rs9367361	T	G	0.2918	CENPQ	TRUE	reported	igd	0.00154303196202624	48.9618883796062
49054765	1e-200	0.0118751	31671	6	-0.389617	eqtl-a-ENSG00000031691	rs6938215	A	G	0.628854	CENPQ	TRUE	reported	igd	0.0328718021737608	1076.4003214679
21082931	2.24595e-18	0.0121767	25056	13	-0.106478	eqtl-a-ENSG00000032742	rs9552218	T	C	0.611256	IFT88	TRUE	reported	igd	0.00304246420599174	76.4585205288691
21122165	1e-200	0.0114751	28916	13	0.377753	eqtl-a-ENSG00000032742	rs7999297	G	A	0.512877	IFT88	TRUE	reported	igd	0.0361231985391625	1083.60960755396
21526636	3.06613e-10	0.0203691	31557	13	-0.128229	eqtl-a-ENSG00000032742	rs9316031	T	C	0.0939695	IFT88	TRUE	reported	igd	0.00125426140766316	39.6279224926595
70240333	9.9426e-15	0.0334171	17597	1	-0.258645	eqtl-a-ENSG00000033122	rs11808152	G	A	0.0326535	LRRC7	TRUE	reported	igd	0.00339278275365806	59.8992376510733
69988363	1e-200	0.0127191	18572	1	-0.402618	eqtl-a-ENSG00000033122	rs12049210	G	A	0.713417	LRRC7	TRUE	reported	igd	0.0511910131717124	1001.90568153919
70083457	1.46319e-15	0.0241965	18578	1	-0.193088	eqtl-a-ENSG00000033122	rs61782217	A	G	0.0643767	LRRC7	TRUE	reported	igd	0.00341602004858777	63.6734983695606
57823476	9.39723e-27	0.0147477	31300	4	0.157911	eqtl-a-ENSG00000033627	rs17081935	T	C	0.202608	ATP6V0A1	TRUE	reported	igd	0.00364958888528749	114.643233602858
142337790	1.0727e-09	0.0124624	24943	8	-0.0759969	eqtl-a-ENSG00000033627	rs6986779	T	C	0.349935	ATP6V0A1	TRUE	reported	igd	0.00148865033854591	37.1837817429536
40608536	1.19179e-41	0.0230779	31684	17	0.312016	eqtl-a-ENSG00000033627	rs3760387	T	G	0.0706528	ATP6V0A1	TRUE	reported	igd	0.00573618021445081	182.782132807999
40380203	3.35158e-08	0.0483666	23680	17	-0.267076	eqtl-a-ENSG00000033627	rs117107843	A	G	0.0153453	ATP6V0A1	TRUE	reported	igd	0.00128599136282844	30.4889119665027
68213895	1.9948e-11	0.0121233	30902	15	0.0813024	eqtl-a-ENSG00000033800	rs436903	A	G	0.598734	PIAS1	TRUE	reported	igd	0.00145327175256347	44.9714528963772
68324830	1e-200	0.0115772	30902	15	-0.361598	eqtl-a-ENSG00000033800	rs7179875	A	G	0.447129	PIAS1	TRUE	reported	igd	0.0306027300742022	975.476606577641
68619631	1.42856e-25	0.0156659	31567	15	-0.163748	eqtl-a-ENSG00000033800	rs11072006	A	T	0.826759	PIAS1	TRUE	reported	igd	0.00344911343817961	109.248074678608
32424882	1.29631e-10	0.012601	30211	6	0.0809917	eqtl-a-ENSG00000034053	rs7763262	C	T	0.666017	APBA2	TRUE	reported	igd	0.00136556520684797	41.3087691515615
94450233	2.4896e-08	0.0120132	31484	10	0.0669643	eqtl-a-ENSG00000034053	rs9420589	T	G	0.428682	APBA2	TRUE	reported	igd	0.000985941048185606	31.0700292962307
111904371	1.43771e-09	0.0119111	28417	12	-0.0720764	eqtl-a-ENSG00000034053	rs4766578	A	T	0.531061	APBA2	TRUE	reported	igd	0.00128690044501395	36.6143952265823
29359671	2.19599e-09	0.0164941	31067	15	-0.0986759	eqtl-a-ENSG00000034053	rs28628664	T	C	0.153413	APBA2	TRUE	reported	igd	0.00115070922299655	35.7879635521194
29034720	3.85727e-09	0.0119031	24814	15	-0.0701118	eqtl-a-ENSG00000034053	rs12101582	C	G	0.475556	APBA2	TRUE	reported	igd	0.00139623490508544	34.6918183927407
29234864	1.04954e-120	0.0174392	31185	15	0.407409	eqtl-a-ENSG00000034053	rs1540642	C	T	0.128705	APBA2	TRUE	reported	igd	0.0171999639239929	545.733064055759
30942625	2.53858e-08	0.0122263	31185	16	0.0681067	eqtl-a-ENSG00000034053	rs10782001	A	G	0.616392	APBA2	TRUE	reported	igd	0.000994058406447036	31.0285674965979
248039451	3.65426e-43	0.012502	31470	1	-0.172202	eqtl-a-ENSG00000034152	rs3811444	T	C	0.337611	MAP2K3	TRUE	reported	igd	0.00599253111820995	189.709811174725
205237137	4.14286e-13	0.0122342	31470	1	0.0887105	eqtl-a-ENSG00000034152	rs1668871	C	T	0.380783	MAP2K3	TRUE	reported	igd	0.00166792755278507	52.5740339107613
60719970	1.58782e-08	0.016465	31086	2	-0.0930567	eqtl-a-ENSG00000034152	rs766432	A	C	0.845872	MAP2K3	TRUE	reported	igd	0.00102650471315018	31.9406597413259
173287851	8.4217e-20	0.012132	31470	5	0.110495	eqtl-a-ENSG00000034152	rs875741	A	G	0.396388	MAP2K3	TRUE	reported	igd	0.00262893875859805	82.945503504578
30128442	1.31522e-16	0.0235622	26198	6	-0.194906	eqtl-a-ENSG00000034152	rs12212092	T	C	0.068141	MAP2K3	TRUE	reported	igd	0.00260506020119343	68.4203962817667
50427982	1e-200	0.0115676	31470	7	0.363133	eqtl-a-ENSG00000034152	rs6592965	A	G	0.449532	MAP2K3	TRUE	reported	igd	0.0303638586924508	985.41077898104
21178335	2.8774e-13	0.0125847	31141	17	-0.0918655	eqtl-a-ENSG00000034152	rs4986004	C	A	0.33516	MAP2K3	TRUE	reported	igd	0.00170822114009489	53.283317771246
40005650	1.64029e-08	0.0222779	31355	17	0.125783	eqtl-a-ENSG00000034152	rs11079018	G	A	0.922832	MAP2K3	TRUE	reported	igd	0.00101565748477191	31.8762845070001
27179590	2.8132e-42	0.014376	27110	17	-0.195884	eqtl-a-ENSG00000034152	rs35033748	C	T	0.215702	MAP2K3	TRUE	reported	igd	0.00680186763270228	185.64777940914
55991637	3.80216e-08	0.011893	26118	20	0.0654117	eqtl-a-ENSG00000034152	rs6014993	G	A	0.490224	MAP2K3	TRUE	reported	igd	0.00115687224839307	30.247868558742
23368	1e-200	0.0127628	17341	2	0.451343	eqtl-a-ENSG00000035115	rs12714397	A	C	0.275878	SH3YL1	TRUE	reported	igd	0.0672673814010364	1250.46460567072
659381	2.19331e-32	0.0146778	30557	2	-0.173908	eqtl-a-ENSG00000035115	rs7591830	G	C	0.204713	SH3YL1	TRUE	reported	igd	0.00457315398307314	140.374674956701
310687	3.00608e-149	0.0155787	30746	2	-0.405346	eqtl-a-ENSG00000035115	rs6754607	G	A	0.832749	SH3YL1	TRUE	reported	igd	0.0215447617019464	676.957031694967
661048	1.00069e-12	0.0205751	31016	2	0.146709	eqtl-a-ENSG00000035115	rs6734782	C	A	0.908195	SH3YL1	TRUE	reported	igd	0.00163656208056872	50.8395384275425
47262246	1.26891e-08	0.0122937	28917	3	-0.0699535	eqtl-a-ENSG00000035115	rs11920354	A	C	0.372903	SH3YL1	TRUE	reported	igd	0.00111844448942451	32.3760332076403
118153977	7.89405e-11	0.0128668	31569	1	0.0836692	eqtl-a-ENSG00000035403	rs826415	G	T	0.308498	VCL	TRUE	reported	igd	0.00133766688803235	42.2826908099507
56849749	1e-200	0.0117966	31684	3	0.392426	eqtl-a-ENSG00000035403	rs1354034	C	T	0.618137	VCL	TRUE	reported	igd	0.0337483154284009	1106.55861870673
144385777	2.71206e-11	0.0266159	25735	6	0.177302	eqtl-a-ENSG00000035403	rs149110519	T	C	0.0526158	VCL	TRUE	reported	igd	0.00172136338715851	44.372224764867
99192919	2.30409e-22	0.0139512	26161	9	0.13571	eqtl-a-ENSG00000035403	rs10820606	C	A	0.236914	VCL	TRUE	reported	igd	0.00360394562561166	94.6166067262969
76027514	2.21259e-50	0.0122306	23725	10	0.182561	eqtl-a-ENSG00000035403	rs61863650	T	G	0.370107	VCL	TRUE	reported	igd	0.00930368107160884	222.783936757243
75773362	1.83358e-14	0.0126208	31017	10	0.0966983	eqtl-a-ENSG00000035403	rs1403629	G	C	0.668915	VCL	TRUE	reported	igd	0.00188904776806184	58.6997030695072
75867193	1e-200	0.0169752	31684	10	-0.706367	eqtl-a-ENSG00000035403	rs2279648	T	G	0.125164	VCL	TRUE	reported	igd	0.0518182329499983	1731.42462065005
243268	2.22177e-28	0.0142589	31569	11	0.157545	eqtl-a-ENSG00000035403	rs505404	G	T	0.222031	VCL	TRUE	reported	igd	0.00385212340027561	122.070208884621
122216910	1.17761e-21	0.0189886	30031	12	0.181535	eqtl-a-ENSG00000035403	rs11553699	G	A	0.10963	VCL	TRUE	reported	igd	0.00303420772780154	91.3915247287399
54712308	1.21451e-19	0.0120663	31684	12	0.109414	eqtl-a-ENSG00000035403	rs10876550	A	G	0.590064	VCL	TRUE	reported	igd	0.00258840340184248	82.2186115109031
33864771	1.25661e-17	0.0290592	29836	17	0.248389	eqtl-a-ENSG00000035403	rs8082605	T	G	0.0436372	VCL	TRUE	reported	igd	0.00244283763799823	73.0580871370576
33886764	3.22329e-19	0.0508421	20854	17	0.455596	eqtl-a-ENSG00000035403	rs145171343	T	C	0.0138172	VCL	TRUE	reported	igd	0.0038357863618783	80.2917994070225
20720973	1.02579e-08	0.0118899	31300	18	0.0680852	eqtl-a-ENSG00000035403	rs11082304	T	G	0.50307	VCL	TRUE	reported	igd	0.00104652583777451	32.7884796618142
1923271	1.10999e-08	0.0131461	31684	20	-0.0751022	eqtl-a-ENSG00000035403	rs4814779	A	C	0.286694	VCL	TRUE	reported	igd	0.00102902120008045	32.6350318005369
128297569	9.8553e-09	0.0121723	31355	3	0.0697888	eqtl-a-ENSG00000035664	rs9880192	C	G	0.392874	DAPK2	TRUE	reported	igd	0.00104728357825979	32.8699061421008
64159176	9.93345e-14	0.0153574	25524	15	0.114288	eqtl-a-ENSG00000035664	rs113453908	T	C	0.183153	DAPK2	TRUE	reported	igd	0.00216508938963775	55.377308224799
64314274	1.735e-96	0.0164829	31352	15	0.343563	eqtl-a-ENSG00000035664	rs332280	T	C	0.85144	DAPK2	TRUE	reported	igd	0.0136679511976638	434.42801089862
38156712	4.8156e-10	0.0122441	30971	17	-0.0762182	eqtl-a-ENSG00000035664	rs4794822	T	C	0.380161	DAPK2	TRUE	reported	igd	0.00124958379772554	38.7467779777372
85788175	1.70137e-20	0.011924	31569	2	0.110652	eqtl-a-ENSG00000035681	rs7568458	A	T	0.451312	NSMAF	TRUE	reported	igd	0.00272038716564269	86.1087106892518
59344064	2.11446e-16	0.0402513	28620	8	0.33068	eqtl-a-ENSG00000035681	rs74884939	C	T	0.0222553	NSMAF	TRUE	reported	igd	0.00235268316368247	67.4878643404515
59418851	1e-200	0.0122853	31684	8	0.462693	eqtl-a-ENSG00000035681	rs10106272	C	T	0.308354	NSMAF	TRUE	reported	igd	0.0428503304240522	1418.36142418174
244461792	1e-200	0.0155668	30277	1	-0.635376	eqtl-a-ENSG00000035687	rs72765888	G	T	0.154672	ADSS2	TRUE	reported	igd	0.0521540272305408	1665.84362835993
244416723	7.09414e-40	0.0120889	30054	1	0.159766	eqtl-a-ENSG00000035687	rs10754823	G	T	0.602826	ADSS2	TRUE	reported	igd	0.00577798284774556	174.649059812421
244532219	5.66761e-21	0.0137371	30601	1	-0.129075	eqtl-a-ENSG00000035687	rs4658419	T	A	0.751897	ADSS2	TRUE	reported	igd	0.00287678467718331	88.2806988990158
244512342	5.61694e-17	0.01318	27015	1	0.110358	eqtl-a-ENSG00000035687	rs900892	G	A	0.283001	ADSS2	TRUE	reported	igd	0.00258848841959635	70.1043018520643
68314440	3.74283e-38	0.0120833	21335	4	-0.156049	eqtl-a-ENSG00000035720	rs7681618	G	A	0.601094	STAP1	TRUE	reported	igd	0.0077566893067792	166.767012887106
68259882	8.21675e-15	0.0121995	26408	4	-0.0947209	eqtl-a-ENSG00000035720	rs4241679	A	T	0.614011	STAP1	TRUE	reported	igd	0.00227762263735275	60.2801989075526
158252438	4.98058e-08	0.0244103	26295	5	-0.133083	eqtl-a-ENSG00000035720	rs17056278	G	C	0.0633351	STAP1	TRUE	reported	igd	0.00112910703601205	29.7211696796686
31237858	5.6607e-10	0.012846	22220	6	-0.0796374	eqtl-a-ENSG00000035720	rs34794906	C	T	0.310471	STAP1	TRUE	reported	igd	0.00172664769751799	38.4290119083841
38051348	5.84252e-18	0.0118723	26026	17	-0.102527	eqtl-a-ENSG00000035720	rs8067378	G	A	0.497388	STAP1	TRUE	reported	igd	0.00285730539780717	74.5715894776713
44747947	1.4042e-09	0.0136698	26026	20	-0.0827733	eqtl-a-ENSG00000035720	rs4810485	G	T	0.746826	STAP1	TRUE	reported	igd	0.00140681629699278	36.6625648065997
101267385	3.39883e-10	0.0124601	26280	3	-0.0782408	eqtl-a-ENSG00000035862	rs13062095	C	T	0.350092	TIMP2	TRUE	reported	igd	0.00149812149230395	39.4267025652469
144385777	2.06443e-19	0.0265814	20446	6	0.239496	eqtl-a-ENSG00000035862	rs149110519	T	C	0.0526158	TIMP2	TRUE	reported	igd	0.00395468201630082	81.1705227478185
76852828	1e-200	0.0152049	26395	17	0.469469	eqtl-a-ENSG00000035862	rs1384364	G	A	0.826299	TIMP2	TRUE	reported	igd	0.0348590680548902	953.265323975549
77133547	4.32126e-09	0.04235	15875	17	-0.248649	eqtl-a-ENSG00000035862	rs138905266	T	C	0.0201069	TIMP2	TRUE	reported	igd	0.00216676014020188	34.4676668721288
76904160	7.87046e-16	0.0119441	25942	17	-0.0962231	eqtl-a-ENSG00000035862	rs6501264	T	C	0.446762	TIMP2	TRUE	reported	igd	0.00249553245077478	64.8960620017506
8504421	1.41801e-08	0.0119903	31569	1	-0.0680019	eqtl-a-ENSG00000036448	rs159963	A	C	0.564555	MYOM2	TRUE	reported	igd	0.00101783856950037	32.1628467093039
2066477	1e-200	0.0202004	31569	8	1.02396	eqtl-a-ENSG00000036448	rs62478453	G	A	0.0798105	MYOM2	TRUE	reported	igd	0.0752665143433748	2569.32196695595
2226119	1.54383e-60	0.0372353	24719	8	0.611146	eqtl-a-ENSG00000036448	rs71519834	G	A	0.025733	MYOM2	TRUE	reported	igd	0.0107805761248331	269.367436229321
2114805	3.50348e-36	0.0357709	23196	8	-0.449279	eqtl-a-ENSG00000036448	rs186777105	G	A	0.0281717	MYOM2	TRUE	reported	igd	0.00675485228885134	157.737537755564
2966852	2.17721e-09	0.016477	31684	8	-0.0985984	eqtl-a-ENSG00000036448	rs750318	C	T	0.846199	MYOM2	TRUE	reported	igd	0.00112889330628465	35.8060189047765
1971299	3.31589e-26	0.0119597	31017	8	0.126651	eqtl-a-ENSG00000036448	rs4876254	A	G	0.56555	MYOM2	TRUE	reported	igd	0.00360254566043983	112.136932076569
2046002	1e-200	0.0161971	31564	8	0.59767	eqtl-a-ENSG00000036448	rs3824184	A	G	0.143833	MYOM2	TRUE	reported	igd	0.0413537346724158	1361.51010121004
2391533	7.08908e-09	0.044624	23970	8	-0.258315	eqtl-a-ENSG00000036448	rs17693117	T	C	0.0180736	MYOM2	TRUE	reported	igd	0.00139600676252715	33.5062650568572
2522583	2.0488e-16	0.0118994	26065	8	-0.0978034	eqtl-a-ENSG00000036448	rs58084828	A	C	0.53192	MYOM2	TRUE	reported	igd	0.00258509140840899	67.5498599399334
2123793	5.35797e-107	0.0356929	26395	8	-0.784235	eqtl-a-ENSG00000036448	rs111994531	G	A	0.0276501	MYOM2	TRUE	reported	igd	0.0179612163596193	482.720633112008
20130102	8.21107e-16	0.02697	31529	8	0.217138	eqtl-a-ENSG00000036565	rs56268521	A	G	0.051087	SLC18A1	TRUE	reported	igd	0.00205167058859598	64.8159997269756
19905904	1.18577e-12	0.0225041	31196	8	0.159939	eqtl-a-ENSG00000036565	rs78299715	G	C	0.0753794	SLC18A1	TRUE	reported	igd	0.00161653057992359	50.507702155192
20010261	1e-200	0.0114286	31191	8	0.432951	eqtl-a-ENSG00000036565	rs73210887	T	G	0.438179	SLC18A1	TRUE	reported	igd	0.0439871534461809	1435.03859156113
6573286	1.01438e-89	0.0302964	29265	5	0.608485	eqtl-a-ENSG00000037474	rs75506645	A	G	0.0390451	NSUN2	TRUE	reported	igd	0.0135963965595347	403.355534320773
6948198	4.35111e-20	0.0119303	31483	5	0.109511	eqtl-a-ENSG00000037474	rs34565284	A	G	0.449012	NSUN2	TRUE	reported	igd	0.00266916791785735	84.2529605212751
6682677	2.30675e-35	0.0321819	29659	5	-0.399371	eqtl-a-ENSG00000037474	rs77431911	G	C	0.0350635	NSUN2	TRUE	reported	igd	0.00516563793864605	153.99279537248
6575251	1.55132e-28	0.0505468	24409	5	-0.560109	eqtl-a-ENSG00000037474	rs80037445	T	C	0.0139392	NSUN2	TRUE	reported	igd	0.00500528206833042	122.778460267294
6641556	2.50726e-22	0.0409237	27197	5	-0.397721	eqtl-a-ENSG00000037474	rs80329314	T	C	0.0214718	NSUN2	TRUE	reported	igd	0.00346083291049762	94.4442066194572
6599940	1e-200	0.0162068	31684	5	0.705178	eqtl-a-ENSG00000037474	rs3776448	T	C	0.137942	NSUN2	TRUE	reported	igd	0.0563842907518862	1893.10869042723
6585234	1e-200	0.0180447	31345	5	-0.671719	eqtl-a-ENSG00000037474	rs575421	C	T	0.888504	NSUN2	TRUE	reported	igd	0.0423370267816264	1385.63301237076
13899223	1.1272e-129	0.01755	26318	19	-0.425201	eqtl-a-ENSG00000037757	rs34596409	A	G	0.126392	MRI1	TRUE	reported	igd	0.0218173198774904	586.950271726475
13865275	1e-200	0.0115041	27564	19	-0.363375	eqtl-a-ENSG00000037757	rs435207	T	A	0.503304	MRI1	TRUE	reported	igd	0.0349317683594468	997.63868290058
13858096	4.60469e-19	0.0129571	31354	19	-0.115594	eqtl-a-ENSG00000037757	rs383243	A	T	0.299532	MRI1	TRUE	reported	igd	0.00253198418174774	79.5842741895189
178336508	1e-200	0.0232097	31237	4	-0.762272	eqtl-a-ENSG00000038002	rs55894716	C	T	0.065362	AGA	TRUE	reported	igd	0.0333785890045177	1078.58176499774
178325212	1e-200	0.014293	30902	4	-0.466003	eqtl-a-ENSG00000038002	rs4690512	G	A	0.797905	AGA	TRUE	reported	igd	0.0332549283381675	1062.92477279762
178633310	1.12357e-57	0.0327652	30543	4	-0.524498	eqtl-a-ENSG00000038002	rs141292540	T	C	0.0335323	AGA	TRUE	reported	igd	0.00831997269198173	256.232130312825
178895392	2.30356e-25	0.0118596	31231	4	-0.123422	eqtl-a-ENSG00000038002	rs13131197	T	G	0.492124	AGA	TRUE	reported	igd	0.0034558567124045	108.29720890802
179229358	2.51831e-08	0.0396306	20421	4	-0.220818	eqtl-a-ENSG00000038002	rs146343140	A	G	0.0230353	AGA	TRUE	reported	igd	0.00151799690182377	31.0431020711064
92753336	8.69501e-09	0.0429779	21629	1	0.247321	eqtl-a-ENSG00000038427	rs141094656	C	T	0.0195137	VCAN	TRUE	reported	igd	0.00152872982297057	33.1124598863247
182323766	8.62581e-20	0.0119705	31569	2	0.10899	eqtl-a-ENSG00000038427	rs1375493	A	G	0.565077	VCAN	TRUE	reported	igd	0.00261908114136417	82.8936395575471
128297569	5.66239e-11	0.012168	31569	3	-0.0797284	eqtl-a-ENSG00000038427	rs9880192	C	G	0.392874	VCAN	TRUE	reported	igd	0.00135811531715735	42.9299300122201
82832139	1.41286e-12	0.0118825	31569	5	-0.0841617	eqtl-a-ENSG00000038427	rs309560	G	C	0.497509	VCAN	TRUE	reported	igd	0.00158658350899743	50.1632698452155
137881690	3.33503e-17	0.0126097	31240	7	0.10635	eqtl-a-ENSG00000038427	rs7785014	C	T	0.668332	VCAN	TRUE	reported	igd	0.00227178229070621	71.1275214406715
113912553	6.87227e-15	0.0118964	31569	9	-0.0926346	eqtl-a-ENSG00000038427	rs10980797	G	A	0.472236	VCAN	TRUE	reported	igd	0.00191699588056465	60.630036491978
54685880	9.24485e-11	0.0256111	29836	12	-0.165924	eqtl-a-ENSG00000038427	rs35979828	T	C	0.0571059	VCAN	TRUE	reported	igd	0.00140478814927842	41.9694077722431
40974023	3.22062e-08	0.0292395	29277	13	0.161665	eqtl-a-ENSG00000038427	rs77526211	A	G	0.0432109	VCAN	TRUE	reported	igd	0.0010430672794587	30.5676787516684
103847287	1.38621e-10	0.0133535	30165	14	0.0856936	eqtl-a-ENSG00000038427	rs8022179	A	T	0.727869	VCAN	TRUE	reported	igd	0.00136336054276705	41.1791861290341
85946450	8.51334e-16	0.0120247	31684	16	-0.0967559	eqtl-a-ENSG00000038427	rs424971	C	T	0.421674	VCAN	TRUE	reported	igd	0.00203929404333815	64.7409396937169
16019984	6.39735e-85	0.0222759	31352	8	-0.434991	eqtl-a-ENSG00000038945	rs73665242	C	A	0.0751576	MSR1	TRUE	reported	igd	0.0120164036138559	381.296060655594
16166251	2.07109e-21	0.0452389	27283	8	0.429838	eqtl-a-ENSG00000038945	rs75959292	C	T	0.0175051	MSR1	TRUE	reported	igd	0.00329806128085477	90.2721328290227
16510222	1.64589e-13	0.0236286	28703	8	0.174256	eqtl-a-ENSG00000038945	rs822284	C	T	0.0678005	MSR1	TRUE	reported	igd	0.0018912549183551	54.3837609671176
16375320	1e-200	0.0127181	30532	8	-0.395229	eqtl-a-ENSG00000038945	rs73191891	T	C	0.287815	MSR1	TRUE	reported	igd	0.030660127715969	965.660988403309
67997920	1.10261e-09	0.0171758	31077	16	-0.104666	eqtl-a-ENSG00000039068	rs3785100	C	T	0.139114	CDH1	TRUE	reported	igd	0.00119349218900881	37.1320866288018
68827720	1.25256e-11	0.0330671	29616	16	0.224003	eqtl-a-ENSG00000039068	rs36085011	A	G	0.0334074	CDH1	TRUE	reported	igd	0.00154709376546114	45.8866256828782
68811307	2.09411e-183	0.0116795	31467	16	0.337312	eqtl-a-ENSG00000039068	rs11642362	C	T	0.569345	CDH1	TRUE	reported	igd	0.0258224739216077	834.041147730196
56849749	1.98852e-08	0.0122367	31684	3	-0.0686858	eqtl-a-ENSG00000039523	rs1354034	C	T	0.618137	RIPOR1	TRUE	reported	igd	0.000993421693740686	31.5048837360546
50370254	4.48849e-16	0.0166427	30077	7	-0.135214	eqtl-a-ENSG00000039523	rs149007767	T	C	0.149708	RIPOR1	TRUE	reported	igd	0.00218982376589136	66.0034857609337
67607848	1.78238e-128	0.0208327	31567	16	-0.502355	eqtl-a-ENSG00000039523	rs111893345	T	C	0.0857429	RIPOR1	TRUE	reported	igd	0.018087143116087	581.437210498591
34797943	2.92611e-08	0.0119513	31558	5	-0.0662772	eqtl-a-ENSG00000039560	rs13155753	G	A	0.449647	RAI14	TRUE	reported	igd	0.00097356626471537	30.7517959604848
34541312	4.38733e-47	0.0158144	31355	5	0.227909	eqtl-a-ENSG00000039560	rs12153461	T	G	0.167713	RAI14	TRUE	reported	igd	0.00658026660640644	207.677673369632
34743608	3.2434e-68	0.0170926	31563	5	0.298323	eqtl-a-ENSG00000039560	rs56142210	A	C	0.137628	RAI14	TRUE	reported	igd	0.00955889295569528	304.599858011753
50370254	2.42829e-13	0.01665	29328	7	0.121928	eqtl-a-ENSG00000039650	rs149007767	T	C	0.149708	PNKP	TRUE	reported	igd	0.00182516693600404	53.6227159734679
50300026	1e-200	0.0113992	23741	19	0.42704	eqtl-a-ENSG00000039650	rs28413128	G	A	0.454777	PNKP	TRUE	reported	igd	0.055814457042494	1403.30404930951
50362286	1.85353e-121	0.033392	29614	19	-0.782562	eqtl-a-ENSG00000039650	rs16981493	C	T	0.0315762	PNKP	TRUE	reported	igd	0.0182085276889371	549.190879256253
50434021	6.09397e-11	0.0263775	29086	19	0.172546	eqtl-a-ENSG00000039650	rs11554772	T	C	0.0536349	PNKP	TRUE	reported	igd	0.00146899420763388	42.7870815097231
168904051	1e-200	0.0242304	24110	5	-0.796944	eqtl-a-ENSG00000040275	rs113640400	C	T	0.0595909	SPDL1	TRUE	reported	igd	0.0429413587066453	1081.67904351275
169081212	3.47216e-19	0.0375408	20308	5	0.336091	eqtl-a-ENSG00000040275	rs140642519	A	G	0.0256513	SPDL1	TRUE	reported	igd	0.0039312339216282	80.1426956964749
168900699	7.65068e-93	0.0122906	24908	5	-0.251199	eqtl-a-ENSG00000040275	rs255738	C	G	0.649127	SPDL1	TRUE	reported	igd	0.0164940675860619	417.690665363023
50370254	3.10778e-09	0.0166609	30077	7	0.0987292	eqtl-a-ENSG00000040633	rs149007767	T	C	0.149708	PHF23	TRUE	reported	igd	0.0011661463524064	35.1127982101782
7112596	6.71429e-39	0.0338683	30546	17	0.441846	eqtl-a-ENSG00000040633	rs72837700	C	A	0.0315064	PHF23	TRUE	reported	igd	0.00554099294966724	170.187094143409
7163350	2.8774e-110	0.0167444	31684	17	-0.373587	eqtl-a-ENSG00000040633	rs1215	G	A	0.142283	PHF23	TRUE	reported	igd	0.0154679999597382	497.756471810346
56849749	1e-200	0.011828	31256	3	0.378849	eqtl-a-ENSG00000041353	rs1354034	C	T	0.618137	RAB27B	TRUE	reported	igd	0.0317797461473261	1025.84528895805
106372219	1.7636e-13	0.0119388	30872	7	0.0879376	eqtl-a-ENSG00000041353	rs342293	G	C	0.450728	RAB27B	TRUE	reported	igd	0.00175428662336209	54.249998109188
4844265	1.6576e-08	0.0146662	31256	9	0.0827817	eqtl-a-ENSG00000041353	rs2236496	C	T	0.207279	RAB27B	TRUE	reported	igd	0.00101825752511668	31.857059380439
99192919	5.83311e-23	0.0139499	25848	9	0.137634	eqtl-a-ENSG00000041353	rs10820606	C	A	0.236914	RAB27B	TRUE	reported	igd	0.00375188779058453	97.3364874141553
202856	8.74782e-45	0.0144671	25797	11	0.203135	eqtl-a-ENSG00000041353	rs11602954	A	G	0.211758	RAB27B	TRUE	reported	igd	0.00758456810240975	197.139149506745
54685880	5.94977e-11	0.0256103	29523	12	0.167624	eqtl-a-ENSG00000041353	rs35979828	T	C	0.0571059	RAB27B	TRUE	reported	igd	0.00144894818510743	42.8364671939535
33875262	2.6212e-16	0.012888	30872	17	-0.105545	eqtl-a-ENSG00000041353	rs8073060	A	T	0.305723	RAB27B	TRUE	reported	igd	0.00216768948362281	67.0619438298273
52488869	6.56448e-55	0.0133009	31256	18	0.207583	eqtl-a-ENSG00000041353	rs7244800	A	G	0.26942	RAB27B	TRUE	reported	igd	0.00773244614576584	243.553133326848
52559705	4.35712e-11	0.0127024	30589	18	-0.0837254	eqtl-a-ENSG00000041353	rs11872375	A	T	0.323557	RAB27B	TRUE	reported	igd	0.00141827754235643	43.4424686657492
1923734	2.97783e-13	0.0125022	30872	20	-0.0912073	eqtl-a-ENSG00000041353	rs6136489	G	T	0.344366	RAB27B	TRUE	reported	igd	0.00172097078284829	53.2179546115362
1819280	4.54025e-09	0.0118931	30102	20	0.069733	eqtl-a-ENSG00000041353	rs156356	C	T	0.48686	RAB27B	TRUE	reported	igd	0.00114076318355738	34.3761869134992
109074098	6.23304e-20	0.0205619	26494	13	-0.187936	eqtl-a-ENSG00000041515	rs58251014	T	G	0.0917	MYO16	TRUE	reported	igd	0.00314324834559155	83.5335017124704
109004653	8.88996e-28	0.0132823	26605	13	0.145091	eqtl-a-ENSG00000041515	rs9301290	G	C	0.274403	MYO16	TRUE	reported	igd	0.00446506329659001	119.31683610474
108957063	1e-200	0.0129139	25942	13	0.568627	eqtl-a-ENSG00000041515	rs9520836	G	A	0.248516	MYO16	TRUE	reported	igd	0.0695399527683952	1938.68224667917
194354509	1e-200	0.0123822	25984	3	-0.385149	eqtl-a-ENSG00000041802	rs6437393	T	G	0.316214	LSG1	TRUE	reported	igd	0.0358986887826859	967.449915376687
194418689	1e-200	0.0185044	26264	3	0.776544	eqtl-a-ENSG00000041802	rs73890213	T	C	0.102479	LSG1	TRUE	reported	igd	0.0628398398487261	1760.96
194430723	6.00759e-15	0.0172687	20673	3	-0.134763	eqtl-a-ENSG00000041802	rs4677623	T	G	0.862937	LSG1	TRUE	reported	igd	0.00293725084614299	60.8947754714009
43116830	1.10739e-36	0.0127286	31146	5	0.161028	eqtl-a-ENSG00000042317	rs1532331	T	G	0.683885	SPATA7	TRUE	reported	igd	0.00511226453048697	160.034505262393
88827433	5.5847e-160	0.014628	29735	14	0.394237	eqtl-a-ENSG00000042317	rs35823815	A	G	0.19577	SPATA7	TRUE	reported	igd	0.0238449127929821	726.299336412083
88796823	1.55883e-14	0.0240799	31031	14	0.184998	eqtl-a-ENSG00000042317	rs73314274	A	G	0.0650713	SPATA7	TRUE	reported	igd	0.00189846965018804	59.0197
85619423	7.23103e-12	0.0403246	10658	2	0.276345	eqtl-a-ENSG00000042445	rs145297992	G	A	0.0222054	RETSAT	TRUE	reported	igd	0.00438710353420431	46.9549715822581
85521105	1e-200	0.0114249	13925	2	0.399322	eqtl-a-ENSG00000042445	rs6718291	A	C	0.484706	RETSAT	TRUE	reported	igd	0.0806539208427988	1221.46008489396
85808087	1.0927e-33	0.0214465	14257	2	-0.259438	eqtl-a-ENSG00000042445	rs72843861	T	C	0.0831367	RETSAT	TRUE	reported	igd	0.0101599412778859	146.316530271809
85534567	2.86748e-26	0.0289857	14262	2	0.307356	eqtl-a-ENSG00000042493	rs61326180	A	G	0.0437422	CAPG	TRUE	reported	igd	0.00782212785013166	112.422929672059
85519840	1e-200	0.0279953	14253	2	-0.8631	eqtl-a-ENSG00000042493	rs139922251	A	C	0.0443098	CAPG	TRUE	reported	igd	0.0625184801947792	950.366319157854
85682100	1.27468e-35	0.0508126	9924	2	-0.632993	eqtl-a-ENSG00000042493	rs139348324	T	C	0.0137599	CAPG	TRUE	reported	igd	0.0153967650348418	155.155596945714
85658232	1e-200	0.0121093	14166	2	0.378407	eqtl-a-ENSG00000042493	rs11674612	G	A	0.344899	CAPG	TRUE	reported	igd	0.0644884810523436	976.380116252211
50427982	3.57437e-21	0.011927	31684	7	-0.112642	eqtl-a-ENSG00000042753	rs6592965	A	G	0.449532	AP2S1	TRUE	reported	igd	0.00280722605117817	89.1889091827607
47298001	3.5416e-10	0.0143768	31270	19	0.090187	eqtl-a-ENSG00000042753	rs57753335	C	T	0.218763	AP2S1	TRUE	reported	igd	0.00125686705904054	39.3492
47441846	2.43893e-67	0.0118867	31562	19	0.206088	eqtl-a-ENSG00000042753	rs311379	C	G	0.567241	AP2S1	TRUE	reported	igd	0.00943412555826099	300.576680764939
133685503	1.26038e-12	0.054864	9204	8	0.389469	eqtl-a-ENSG00000042832	rs150349565	T	C	0.0118673	TG	TRUE	reported	igd	0.0054453138167774	50.3821242191146
134108453	3.79752e-17	0.0118935	31466	8	-0.100129	eqtl-a-ENSG00000042832	rs2069568	T	C	0.47119	TG	TRUE	reported	igd	0.00224740700736487	70.8716916160899
133785737	1e-200	0.0116082	31355	8	0.357912	eqtl-a-ENSG00000042832	rs2467959	C	T	0.560901	TG	TRUE	reported	igd	0.0294268794128693	950.593964186407
144385777	1.27941e-08	0.0266272	25735	6	0.15148	eqtl-a-ENSG00000042980	rs149110519	T	C	0.0526158	ADAM28	TRUE	reported	igd	0.00125599989467798	32.3612910679214
24141928	1.4101e-10	0.0165867	31228	8	-0.1064	eqtl-a-ENSG00000042980	rs397667	T	C	0.848736	ADAM28	TRUE	reported	igd	0.00131597369801293	41.1467427253373
24214935	1.33045e-126	0.0120271	31559	8	-0.287866	eqtl-a-ENSG00000042980	rs892587	A	C	0.378908	ADAM28	TRUE	reported	igd	0.0178288302848628	572.83741841312
111884608	4.45985e-08	0.0119332	28418	12	0.0652948	eqtl-a-ENSG00000042980	rs3184504	C	T	0.542056	ADAM28	TRUE	reported	igd	0.00105242835031897	29.9373108773634
169735262	8.4217e-89	0.0161428	30688	5	0.322516	eqtl-a-ENSG00000043462	rs12652307	C	G	0.156774	LCP2	TRUE	reported	igd	0.0128399631522667	399.131948806017
169540994	7.50067e-14	0.0426333	27962	5	-0.318842	eqtl-a-ENSG00000043462	rs146319868	T	G	0.0198043	LCP2	TRUE	reported	igd	0.00199625991586795	55.9270722201527
169761334	8.05008e-28	0.0121137	31470	5	0.132433	eqtl-a-ENSG00000043462	rs315773	A	G	0.603085	LCP2	TRUE	reported	igd	0.00378351784153743	119.511914899799
40354973	7.86321e-23	0.0352409	31120	1	0.346644	eqtl-a-ENSG00000043514	rs80342257	C	T	0.0291803	TRIT1	TRUE	reported	igd	0.00309945715199337	96.7487763425109
40221806	6.00067e-21	0.0499515	17371	1	0.46905	eqtl-a-ENSG00000043514	rs150780735	T	C	0.0143136	TRIT1	TRUE	reported	igd	0.00505030393616491	88.1639839825835
40260447	1e-200	0.0170604	27310	1	0.583833	eqtl-a-ENSG00000043514	rs230288	G	A	0.870969	TRIT1	TRUE	reported	igd	0.0411189389850584	1171.0273895862
137358317	4.46889e-27	0.020733	29796	5	-0.223415	eqtl-a-ENSG00000044115	rs78386494	T	C	0.0897985	CTNNA1	TRUE	reported	igd	0.00388197909504232	116.110423394023
137980855	1e-200	0.012065	27359	5	-0.367514	eqtl-a-ENSG00000044115	rs6596446	C	T	0.352827	CTNNA1	TRUE	reported	igd	0.0328025821506114	927.814966555272
138055308	1e-200	0.0154793	31529	5	0.484873	eqtl-a-ENSG00000044115	rs17286171	T	C	0.165679	CTNNA1	TRUE	reported	igd	0.030181015793376	981.128334682136
138472048	6.15545e-10	0.0473239	7882	5	-0.29276	eqtl-a-ENSG00000044115	rs116346542	T	G	0.0160314	CTNNA1	TRUE	reported	igd	0.00483194981530742	38.2606380274729
139091316	2.47651e-09	0.032527	29707	5	0.193962	eqtl-a-ENSG00000044115	rs72790996	A	G	0.0345939	CTNNA1	TRUE	reported	igd	0.00119554784554451	35.5562579594987
139066854	2.43893e-85	0.020789	27095	5	-0.406978	eqtl-a-ENSG00000044115	rs34897167	A	C	0.0874433	CTNNA1	TRUE	reported	igd	0.0139471573958489	383.215096594401
50370254	4.38531e-19	0.0166347	30037	7	-0.148493	eqtl-a-ENSG00000044115	rs149007767	T	C	0.149708	CTNNA1	TRUE	reported	igd	0.00264590858792935	79.680692266418
31240721	5.18501e-10	0.0119074	30602	6	0.0739854	eqtl-a-ENSG00000044574	rs2249742	T	C	0.470933	HSPA5	TRUE	reported	igd	0.0012599717615086	38.603775569268
128118864	1.37057e-56	0.0386177	25632	9	0.612155	eqtl-a-ENSG00000044574	rs2416962	G	A	0.0239091	HSPA5	TRUE	reported	igd	0.00970802217950127	251.255805392093
127832040	1.036e-10	0.0183885	31562	9	-0.118817	eqtl-a-ENSG00000044574	rs11790965	C	T	0.118492	HSPA5	TRUE	reported	igd	0.00132107029978075	41.7481308768531
56356502	6.11928e-23	0.0461111	22060	17	-0.454711	eqtl-a-ENSG00000044574	rs56378716	G	A	0.0168293	HSPA5	TRUE	reported	igd	0.0043887842115067	97.2345435670349
13000550	4.11908e-13	0.0123682	31569	19	0.0896908	eqtl-a-ENSG00000044574	rs56397034	C	G	0.361095	HSPA5	TRUE	reported	igd	0.00166302633732392	52.5842013019965
144385777	3.79359e-08	0.0266292	25521	6	0.146469	eqtl-a-ENSG00000047056	rs149110519	T	C	0.0526158	WDR37	TRUE	reported	igd	0.00118403075646484	30.2510991059846
1096932	2.56094e-69	0.0366664	31141	10	0.645248	eqtl-a-ENSG00000047056	rs7100196	A	G	0.026484	WDR37	TRUE	reported	igd	0.00984660949691315	309.662700815064
1196692	4.28706e-10	0.0233453	29907	10	-0.145749	eqtl-a-ENSG00000047056	rs57148007	T	C	0.0696718	WDR37	TRUE	reported	igd	0.0013015886632106	38.9747380505111
1156165	2.96006e-20	0.0224186	31086	10	-0.206711	eqtl-a-ENSG00000047056	rs10794720	C	T	0.924194	WDR37	TRUE	reported	igd	0.00272746518317768	85.0123961044083
112323305	1.2368e-12	0.0132207	27156	5	0.0938841	eqtl-a-ENSG00000047188	rs62366969	G	A	0.280784	YTHDC2	TRUE	reported	igd	0.00185354725033636	50.4246865747834
112681830	2.52697e-23	0.0136094	31684	5	0.13541	eqtl-a-ENSG00000047188	rs6876848	A	G	0.254895	YTHDC2	TRUE	reported	igd	0.00311478924911371	98.9910893713525
113237169	2.9061e-08	0.0469918	19579	5	0.260668	eqtl-a-ENSG00000047188	rs114855595	T	G	0.0162714	YTHDC2	TRUE	reported	igd	0.00156912944510299	30.7671247481647
112760874	1e-200	0.014702	31569	5	0.448675	eqtl-a-ENSG00000047188	rs10063334	C	T	0.189741	YTHDC2	TRUE	reported	igd	0.0286564854628386	931.286679807052
36069805	2.45482e-10	0.0131235	26410	4	-0.0830677	eqtl-a-ENSG00000047365	rs7657166	A	G	0.288098	ARAP2	TRUE	reported	igd	0.00151474063783869	40.0619542341539
36376074	2.54408e-09	0.0206716	26295	4	-0.123172	eqtl-a-ENSG00000047365	rs34967438	T	C	0.090964	ARAP2	TRUE	reported	igd	0.00134839344030369	35.5011782818231
36312542	6.13762e-156	0.0300415	26004	4	-0.799213	eqtl-a-ENSG00000047365	rs28530750	A	G	0.0388887	ARAP2	TRUE	reported	igd	0.0264959477145514	707.698782410158
144385777	6.4506e-13	0.0266091	20501	6	0.191335	eqtl-a-ENSG00000047365	rs149110519	T	C	0.0526158	ARAP2	TRUE	reported	igd	0.0025157037182881	51.6994710727991
186954285	1.22687e-14	0.0120199	31565	1	0.0927122	eqtl-a-ENSG00000047410	rs10752988	C	T	0.576482	TPR	TRUE	reported	igd	0.00188125852516092	59.4900790480257
186301050	1.44544e-136	0.0157826	31569	1	-0.392565	eqtl-a-ENSG00000047410	rs3736597	C	G	0.162716	TPR	TRUE	reported	igd	0.0192210177128725	618.640771366588
31851234	1.33131e-08	0.0146941	30872	6	0.083495	eqtl-a-ENSG00000047410	rs652888	G	A	0.206206	TPR	TRUE	reported	igd	0.0010447592380762	32.2854481996742
16442019	1.90327e-14	0.012647	22704	19	-0.0968368	eqtl-a-ENSG00000047410	rs55908509	A	G	0.3284	TPR	TRUE	reported	igd	0.00257562966966384	58.622935733306
15441925	1e-200	0.0208299	31353	6	0.653483	eqtl-a-ENSG00000047579	rs7756497	T	C	0.0832516	DTNBP1	TRUE	reported	igd	0.030436273297651	984.161822348778
15799979	1.92486e-26	0.0371863	27261	6	0.395696	eqtl-a-ENSG00000047579	rs112876093	T	C	0.0260937	DTNBP1	TRUE	reported	igd	0.00413633293566308	113.220617663076
15536762	2.36102e-61	0.0179846	31354	6	-0.297224	eqtl-a-ENSG00000047579	rs62396144	A	G	0.122429	DTNBP1	TRUE	reported	igd	0.00863587658493976	273.110551709641
139840693	9.50605e-11	0.0119103	9188	6	0.0771147	eqtl-a-ENSG00000047597	rs592423	C	A	0.532047	XK	TRUE	reported	igd	0.00454183103537409	41.9116
135419018	2.07769e-08	0.0134807	9188	6	0.0755663	eqtl-a-ENSG00000047597	rs9399137	C	T	0.264393	XK	TRUE	reported	igd	0.00340822095261233	31.414986887232
50427982	2.11106e-18	0.0119323	9188	7	0.104424	eqtl-a-ENSG00000047597	rs6592965	A	G	0.449532	XK	TRUE	reported	igd	0.00826658776782313	76.5698465924485
43831259	1.10479e-08	0.0135678	9188	18	0.0775226	eqtl-a-ENSG00000047597	rs9944715	G	A	0.740866	XK	TRUE	reported	igd	0.00354059634795973	32.6394812805794
56849749	5.87354e-13	0.0122279	23703	3	0.0880824	eqtl-a-ENSG00000047617	rs1354034	C	T	0.618137	ANO2	TRUE	reported	igd	0.00218434643612853	51.8845286679684
6072011	5.74381e-14	0.0134646	23374	12	0.101172	eqtl-a-ENSG00000047617	rs10849364	A	G	0.26465	ANO2	TRUE	reported	igd	0.00240964442062837	56.4542440531297
6167118	3.9204e-08	0.0221377	23701	12	0.121635	eqtl-a-ENSG00000047617	rs35365059	T	C	0.0782501	ANO2	TRUE	reported	igd	0.00127213329947702	30.186688556019
43359061	7.60449e-09	0.0135507	9188	2	-0.0782798	eqtl-a-ENSG00000047644	rs12466022	A	C	0.260124	WWC3	TRUE	reported	igd	0.00361893209549766	33.3642531959747
144385777	2.58167e-12	0.0266116	5511	6	-0.186247	eqtl-a-ENSG00000047644	rs149110519	T	C	0.0526158	WWC3	TRUE	reported	igd	0.00880974244415709	48.9642334101807
50370254	4.75773e-21	0.0166295	8025	7	0.156558	eqtl-a-ENSG00000047644	rs149007767	T	C	0.149708	WWC3	TRUE	reported	igd	0.0109238775389334	88.6102368711391
28724374	2.88868e-09	0.013111	9188	7	0.0778529	eqtl-a-ENSG00000047644	rs56388170	T	G	0.289189	WWC3	TRUE	reported	igd	0.00382290512098818	35.2519713833236
40974023	3.24272e-08	0.0292395	9188	13	-0.161627	eqtl-a-ENSG00000047644	rs77526211	A	G	0.0432109	WWC3	TRUE	reported	igd	0.00331455378258246	30.5487465101007
175815591	4.60893e-32	0.0448517	9548	5	0.528627	eqtl-a-ENSG00000048162	rs141048893	G	A	0.0177524	NOP16	TRUE	reported	igd	0.0143402094652761	138.883254516512
175632897	3.57273e-11	0.0320421	21378	5	0.212148	eqtl-a-ENSG00000048162	rs181254695	A	G	0.0356675	NOP16	TRUE	reported	igd	0.00204634681728635	43.8324058705601
175811233	1.29718e-129	0.0239257	24702	5	0.579534	eqtl-a-ENSG00000048162	rs1065206	T	C	0.0634362	NOP16	TRUE	reported	igd	0.02320073488152	586.669310714557
28724374	2.55447e-13	0.0131025	31101	7	0.0958593	eqtl-a-ENSG00000048392	rs56388170	T	G	0.289189	RRM2B	TRUE	reported	igd	0.00171806278111877	53.5219885665403
103250775	9.89008e-38	0.0219585	31314	8	-0.281927	eqtl-a-ENSG00000048392	rs1037700	C	G	0.0788321	RRM2B	TRUE	reported	igd	0.00523659819790916	164.831519209382
103251997	3.66775e-85	0.0135444	31430	8	-0.264871	eqtl-a-ENSG00000048392	rs2853231	A	G	0.251005	RRM2B	TRUE	reported	igd	0.0120213285894862	382.40331076276
32665420	2.34779e-08	0.0186529	30211	6	-0.10416	eqtl-a-ENSG00000048462	rs10484561	G	T	0.114756	TNFRSF17	TRUE	reported	igd	0.00103108884990789	31.1803
112072424	3.94721e-08	0.0122446	31185	12	-0.0672607	eqtl-a-ENSG00000048462	rs11065987	G	A	0.380678	TNFRSF17	TRUE	reported	igd	0.000966646761024838	30.172111723108
12062396	1.54277e-21	0.0123746	31684	16	-0.117954	eqtl-a-ENSG00000048462	rs12597429	C	T	0.358037	TNFRSF17	TRUE	reported	igd	0.00285942947153613	90.8522300614001
12615194	1e-200	0.0115238	25018	16	0.363975	eqtl-a-ENSG00000048471	rs1894967	G	A	0.470668	SNX29	TRUE	reported	igd	0.0383458192320481	997.509326214206
12666356	4.9545e-148	0.0267435	23755	16	0.692967	eqtl-a-ENSG00000048471	rs72775264	A	G	0.0497549	SNX29	TRUE	reported	igd	0.0274871019929594	671.354729563738
12399075	1.42679e-10	0.0280026	22701	16	0.179584	eqtl-a-ENSG00000048471	rs7192378	C	T	0.0472783	SNX29	TRUE	reported	igd	0.0018084539996665	41.1244690489658
12594266	4.52387e-09	0.030127	9332	16	0.176662	eqtl-a-ENSG00000048471	rs3902078	G	A	0.04058	SNX29	TRUE	reported	igd	0.00367115300559628	34.3780646776814
12666739	1.85097e-81	0.0388948	25852	16	0.743525	eqtl-a-ENSG00000048471	rs79525599	C	T	0.0233709	SNX29	TRUE	reported	igd	0.0139385595530955	365.404983572034
12087784	5.87219e-30	0.0126392	25514	16	0.143714	eqtl-a-ENSG00000048471	rs398057	A	C	0.326015	SNX29	TRUE	reported	igd	0.00504179599119248	129.278093098837
40778854	8.7882e-59	0.0246616	30735	1	-0.398672	eqtl-a-ENSG00000049089	rs78453743	T	C	0.0608924	COL9A2	TRUE	reported	igd	0.00843099239314219	261.312815578814
43721508	3.12594e-10	0.0120214	31300	2	0.0756423	eqtl-a-ENSG00000049089	rs12478601	T	C	0.574604	COL9A2	TRUE	reported	igd	0.00126335674043649	39.5905562582879
103434253	2.34423e-161	0.0124341	31569	4	0.336566	eqtl-a-ENSG00000049089	rs3774937	C	T	0.320593	COL9A2	TRUE	reported	igd	0.0226822805985477	732.629253967553
144385777	4.04017e-11	0.0266167	25735	6	0.175742	eqtl-a-ENSG00000049089	rs149110519	T	C	0.0526158	COL9A2	TRUE	reported	igd	0.00169115516384245	43.5922170340984
9291666	1e-200	0.0115447	31522	1	-0.46313	eqtl-a-ENSG00000049239	rs6577563	C	T	0.393136	H6PD	TRUE	reported	igd	0.0485737772345537	1609.21091073457
9397865	4.08507e-12	0.0348069	30516	1	0.241365	eqtl-a-ENSG00000049239	rs72643827	C	G	0.030042	H6PD	TRUE	reported	igd	0.00157328167761931	48.0827648438137
9427869	2.27688e-10	0.0153441	27359	1	-0.0973031	eqtl-a-ENSG00000049239	rs2275457	A	G	0.816184	H6PD	TRUE	reported	igd	0.00146768352300432	40.2104343307494
9121498	2.06771e-09	0.012505	31008	1	0.0749347	eqtl-a-ENSG00000049239	rs2986630	T	C	0.344935	H6PD	TRUE	reported	igd	0.00115670378735004	35.9062905728705
9280050	6.12632e-22	0.0341893	26010	1	-0.329154	eqtl-a-ENSG00000049239	rs74512616	T	C	0.0310724	H6PD	TRUE	reported	igd	0.00355085259470608	92.6796661160203
7719903	3.51974e-08	0.0133161	31684	1	0.0734185	eqtl-a-ENSG00000049245	rs56884865	T	C	0.274926	VAMP3	TRUE	reported	igd	0.000958518358219201	30.3969146258028
7950052	2.06871e-28	0.0145529	31139	1	0.160887	eqtl-a-ENSG00000049245	rs227165	A	G	0.209868	VAMP3	TRUE	reported	igd	0.0039096411054254	122.212301336524
7833951	1e-200	0.0146428	31569	1	0.4671	eqtl-a-ENSG00000049245	rs11590868	G	T	0.190326	VAMP3	TRUE	reported	igd	0.0312271679762072	1017.52235293973
7953531	1e-200	0.0355218	30924	1	1.12062	eqtl-a-ENSG00000049246	rs56867169	A	G	0.0269509	PER3	TRUE	reported	igd	0.0311798698688755	995.173310400637
8021740	1.13841e-46	0.0155129	28536	1	-0.222539	eqtl-a-ENSG00000049246	rs17523802	A	G	0.176091	PER3	TRUE	reported	igd	0.00715999060038716	205.776529810672
7805588	1.35738e-72	0.0147248	31101	1	0.265344	eqtl-a-ENSG00000049246	rs35925924	G	A	0.199505	PER3	TRUE	reported	igd	0.0103331893324487	324.707115148243
44229068	3.0178e-08	0.0161793	30931	7	-0.0896379	eqtl-a-ENSG00000049246	rs1799884	T	C	0.160927	PER3	TRUE	reported	igd	0.000991377748359572	30.6927504888838
41757647	1.80343e-19	0.0142316	31315	22	0.128435	eqtl-a-ENSG00000049246	rs4822024	A	G	0.224124	PER3	TRUE	reported	igd	0.00259405308839724	81.4388410340826
8014568	2.61758e-39	0.0155525	23675	1	-0.204006	eqtl-a-ENSG00000049247	rs35731977	A	G	0.17548	UTS2	TRUE	reported	igd	0.00721523659768641	172.047660554006
8188173	4.54046e-16	0.0266709	26240	1	0.216653	eqtl-a-ENSG00000049247	rs9435005	C	T	0.0523021	UTS2	TRUE	reported	igd	0.0025084155349772	65.9813153632071
7846146	1e-200	0.0377138	25081	1	1.25051	eqtl-a-ENSG00000049247	rs60102794	T	C	0.0236655	UTS2	TRUE	reported	igd	0.0419949159550203	1099.35794159784
8024592	1.18686e-15	0.016412	31683	1	0.131395	eqtl-a-ENSG00000049249	rs4908488	C	T	0.154916	TNFRSF9	TRUE	reported	igd	0.00201897364154758	64.0925050161171
8003009	1.65082e-36	0.0314275	29097	1	-0.396594	eqtl-a-ENSG00000049249	rs17229038	T	C	0.0368204	TNFRSF9	TRUE	reported	igd	0.00544319618696549	159.236548835206
7924023	3.80172e-09	0.0144448	31568	1	0.0851175	eqtl-a-ENSG00000049249	rs34947804	T	C	0.216019	TNFRSF9	TRUE	reported	igd	0.0010987278956614	34.7205932387931
7996338	1.77746e-52	0.0379404	28236	1	-0.578394	eqtl-a-ENSG00000049249	rs9657975	T	C	0.0248262	TNFRSF9	TRUE	reported	igd	0.00816357949467087	232.387618247679
50370254	4.48332e-64	0.0165154	30077	7	-0.279113	eqtl-a-ENSG00000049249	rs149007767	T	C	0.149708	TNFRSF9	TRUE	reported	igd	0.00940681828380908	285.596615348613
16170764	2.0855e-09	0.0118961	31569	17	-0.0712673	eqtl-a-ENSG00000049249	rs7210990	A	C	0.481977	TNFRSF9	TRUE	reported	igd	0.00113557838642217	35.8875560571888
56849749	1.90985e-136	0.0119906	31684	3	0.298113	eqtl-a-ENSG00000049323	rs1354034	C	T	0.618137	LTBP1	TRUE	reported	igd	0.0191358974626218	618.091233884953
243268	1.76563e-15	0.0142884	31569	11	0.11369	eqtl-a-ENSG00000049323	rs505404	G	T	0.222031	LTBP1	TRUE	reported	igd	0.00200145769791966	63.3067208740534
54712308	6.64049e-26	0.0120542	31684	12	0.126866	eqtl-a-ENSG00000049323	rs10876550	A	G	0.590064	LTBP1	TRUE	reported	igd	0.00348383878758512	110.760853425582
31238318	5.78695e-09	0.0127141	30872	6	0.074029	eqtl-a-ENSG00000050165	rs9264638	A	G	0.677162	DKK3	TRUE	reported	igd	0.00109696075071671	33.9003657452822
11892816	6.43428e-31	0.0362596	23248	11	0.419226	eqtl-a-ENSG00000050165	rs11022069	T	C	0.0274432	DKK3	TRUE	reported	igd	0.00571708672403626	133.66356417518
12016838	1.15133e-11	0.030684	26163	11	-0.208225	eqtl-a-ENSG00000050165	rs12577616	T	C	0.0390246	DKK3	TRUE	reported	igd	0.00175707578118715	46.0477689312036
12145217	3.40549e-08	0.0123485	24732	11	-0.0681526	eqtl-a-ENSG00000050165	rs12790969	G	A	0.365114	DKK3	TRUE	reported	igd	0.00123010632098005	30.4579958911067
12010581	1e-200	0.0179361	26494	11	-0.7189	eqtl-a-ENSG00000050165	rs988667	C	T	0.111233	DKK3	TRUE	reported	igd	0.0571698265847508	1606.37948231656
11856341	2.3518e-86	0.0178006	26493	11	-0.350591	eqtl-a-ENSG00000050165	rs79552561	G	A	0.12424	DKK3	TRUE	reported	igd	0.0144307285946514	387.881848889019
12038430	5.09683e-14	0.0450154	17602	11	-0.33893	eqtl-a-ENSG00000050165	rs71478987	T	C	0.0177253	DKK3	TRUE	reported	igd	0.00321025359764269	56.6824282878455
25979561	1.3724e-08	0.0294108	10333	7	0.166959	eqtl-a-ENSG00000050344	rs146154536	C	T	0.0426805	NFE2L3	TRUE	reported	igd	0.00310904651403445	32.2197321825151
25908952	8.82877e-12	0.0158618	14263	7	-0.108246	eqtl-a-ENSG00000050344	rs6960950	G	T	0.168836	NFE2L3	TRUE	reported	igd	0.0032545590096892	46.5648139720249
26135404	1e-200	0.0139676	14257	7	-0.53013	eqtl-a-ENSG00000050344	rs35257100	T	C	0.208035	NFE2L3	TRUE	reported	igd	0.0917677251073678	1440.3241963188
50461676	1e-200	0.0116634	31682	12	-0.353057	eqtl-a-ENSG00000050405	rs844347	C	A	0.425997	LIMA1	TRUE	reported	igd	0.0281089300635305	916.245587554228
51355243	5.34072e-12	0.0250853	26336	12	0.172998	eqtl-a-ENSG00000050405	rs76637716	A	G	0.0596632	LIMA1	TRUE	reported	igd	0.00180264483100939	47.5565765967839
51213433	5.19637e-24	0.0200508	29781	12	-0.202631	eqtl-a-ENSG00000050405	rs17291650	G	A	0.0968591	LIMA1	TRUE	reported	igd	0.00341760839754679	102.121973384358
154353012	1.8078e-09	0.0133728	31470	5	0.0804267	eqtl-a-ENSG00000050426	rs13165424	G	A	0.271036	LETMD1	TRUE	reported	igd	0.00114804835229171	36.1683085169135
51442616	9.54993e-127	0.0230962	31355	12	0.55312	eqtl-a-ENSG00000050426	rs7972608	C	A	0.931494	LETMD1	TRUE	reported	igd	0.0179629933808666	573.495426011717
51546090	9.62277e-36	0.0150418	31351	12	0.18772	eqtl-a-ENSG00000050426	rs34498074	T	C	0.191544	LETMD1	TRUE	reported	igd	0.00494331057576163	155.737703074203
177674431	7.88134e-17	0.0147756	14248	5	-0.123124	eqtl-a-ENSG00000050767	rs3812092	A	G	0.202443	COL23A1	TRUE	reported	igd	0.00484986757146489	69.4279296878358
177907371	2.31526e-79	0.0125499	14256	5	-0.236724	eqtl-a-ENSG00000050767	rs686282	G	A	0.674987	COL23A1	TRUE	reported	igd	0.0243500791721107	355.748533474738
178010868	4.09638e-12	0.0118833	14254	5	0.0823988	eqtl-a-ENSG00000050767	rs540371	G	A	0.499037	COL23A1	TRUE	reported	igd	0.00336177340949043	48.0736072064625
178116343	3.12651e-08	0.0124006	11496	5	0.0686287	eqtl-a-ENSG00000050767	rs9329048	C	T	0.358082	COL23A1	TRUE	reported	igd	0.00265719758809034	30.6232009732762
227175367	2.47811e-08	0.0119202	31569	1	0.066454	eqtl-a-ENSG00000051009	rs6426558	T	G	0.464662	FHIP1B	TRUE	reported	igd	0.000983528600665537	31.0776130584924
6307696	5.08394e-12	0.0156829	31051	11	-0.108261	eqtl-a-ENSG00000051009	rs12365470	T	A	0.173718	FHIP1B	TRUE	reported	igd	0.00153232095947683	47.6500486390459
6224304	6.99842e-123	0.022961	31568	11	0.541304	eqtl-a-ENSG00000051009	rs2615951	G	A	0.0694712	FHIP1B	TRUE	reported	igd	0.0173011219698667	555.742179329187
6239553	4.9136e-14	0.0485263	19568	11	-0.365602	eqtl-a-ENSG00000051009	rs61876722	C	T	0.0152142	FHIP1B	TRUE	reported	igd	0.00289240001353277	56.7568622138176
6224357	1e-200	0.0256944	31240	11	1.37468	eqtl-a-ENSG00000051009	rs117202587	T	A	0.0467992	FHIP1B	TRUE	reported	igd	0.0839347233476178	2862.19001501116
50370254	2.24213e-08	0.0166632	30077	7	-0.0931821	eqtl-a-ENSG00000051108	rs149007767	T	C	0.149708	HERPUD1	TRUE	reported	igd	0.0010386335579829	31.2693816854918
56927328	1.77705e-33	0.0150963	31565	16	0.18202	eqtl-a-ENSG00000051108	rs28728226	C	A	0.189921	HERPUD1	TRUE	reported	igd	0.00458454006552334	145.368
56883438	1.35831e-165	0.0116097	31566	16	-0.318404	eqtl-a-ENSG00000051108	rs8044753	A	G	0.522026	HERPUD1	TRUE	reported	igd	0.0232738535122756	752.120658285972
56994212	4.04846e-09	0.013238	31564	16	0.0778697	eqtl-a-ENSG00000051108	rs12720918	C	T	0.280097	HERPUD1	TRUE	reported	igd	0.00109502589794953	34.5990942953822
43360065	1.68089e-08	0.0136518	26953	2	0.0770235	eqtl-a-ENSG00000051382	rs28498283	T	A	0.254318	PIK3CB	TRUE	reported	igd	0.00117963307914682	31.8298386466575
138605971	3.28269e-09	0.0118916	31567	3	-0.07036	eqtl-a-ENSG00000051382	rs9809657	G	T	0.489148	PIK3CB	TRUE	reported	igd	0.00110778733081332	35.0060863961333
959111	1.24621e-10	0.014557	31569	10	0.0936541	eqtl-a-ENSG00000051382	rs12264390	C	T	0.21134	PIK3CB	TRUE	reported	igd	0.00130942296223956	41.388750028682
88842866	1.33441e-08	0.0180044	13099	16	-0.102292	eqtl-a-ENSG00000051523	rs55633573	T	C	0.124538	CYBA	TRUE	reported	igd	0.00245821005282559	32.2745145980918
88709828	1.22462e-148	0.0119909	10094	16	-0.311347	eqtl-a-ENSG00000051523	rs1049254	G	A	0.621911	CYBA	TRUE	reported	igd	0.0626098811556864	674.061853139856
88656044	2.66624e-31	0.0151207	14261	16	-0.17596	eqtl-a-ENSG00000051523	rs12597572	G	A	0.189292	CYBA	TRUE	reported	igd	0.00940653319135866	135.401414676898
138731460	6.31684e-47	0.0252669	31240	6	-0.363493	eqtl-a-ENSG00000051620	rs56004125	T	G	0.0580547	HEBP2	TRUE	reported	igd	0.00658126685361243	206.947591296178
138644032	1e-200	0.0276264	27617	6	-1.03275	eqtl-a-ENSG00000051620	rs7750577	A	G	0.0441842	HEBP2	TRUE	reported	igd	0.0481645167071678	1397.36661662071
138645402	1e-200	0.0388511	28323	6	-1.37365	eqtl-a-ENSG00000051620	rs76623389	G	A	0.0220449	HEBP2	TRUE	reported	igd	0.0422715971117342	1250.01398955179
19165263	2.73275e-28	0.0374201	25992	12	0.412755	eqtl-a-ENSG00000052126	rs11044383	G	A	0.0257442	PLEKHA5	TRUE	reported	igd	0.00465915251660264	121.658198005907
19380247	2.00217e-15	0.0467023	20651	12	0.370877	eqtl-a-ENSG00000052126	rs117616506	T	C	0.016439	PLEKHA5	TRUE	reported	igd	0.00304451378645655	63.0581465731316
19590807	8.13954e-11	0.0380107	28133	12	-0.24699	eqtl-a-ENSG00000052126	rs12813757	G	A	0.025073	PLEKHA5	TRUE	reported	igd	0.00149857901286133	42.2197959108815
19303772	1e-200	0.0149654	31086	12	0.520606	eqtl-a-ENSG00000052126	rs1514831	C	T	0.822993	PLEKHA5	TRUE	reported	igd	0.0374706160485531	1210.07903620736
85806068	3.24041e-13	0.012042	31569	2	0.0877149	eqtl-a-ENSG00000052749	rs3731827	C	T	0.418566	RRP12	TRUE	reported	igd	0.00167787410234161	53.0544705107011
173205318	7.2929e-10	0.0137202	31569	5	0.0845093	eqtl-a-ENSG00000052749	rs2594836	A	G	0.749651	RRP12	TRUE	reported	igd	0.00120034388281818	37.9367925457876
148200011	2.16073e-16	0.0120385	31569	5	0.098869	eqtl-a-ENSG00000052749	rs56330463	C	T	0.582097	RRP12	TRUE	reported	igd	0.00213200293514784	67.4447290140299
98942021	1.5838e-16	0.041741	24363	10	0.344367	eqtl-a-ENSG00000052749	rs117072213	T	C	0.0206605	RRP12	TRUE	reported	igd	0.00278596062834936	68.0583948757713
98838735	1.73241e-08	0.012313	31355	10	0.069407	eqtl-a-ENSG00000052749	rs2817684	A	C	0.370091	RRP12	TRUE	reported	igd	0.00101235329358287	31.772477786236
99493423	5.31374e-36	0.0118893	31231	10	0.148937	eqtl-a-ENSG00000052749	rs10882992	G	A	0.546433	RRP12	TRUE	reported	igd	0.00499953972419795	156.915129470091
99183402	1e-200	0.0123103	31684	10	-0.428733	eqtl-a-ENSG00000052749	rs928603	C	T	0.313597	RRP12	TRUE	reported	igd	0.0368706803572856	1212.85571029325
98948238	1e-200	0.011999	29569	10	0.409581	eqtl-a-ENSG00000052749	rs701802	A	G	0.349249	RRP12	TRUE	reported	igd	0.0379112409542184	1165.09173478456
111884608	9.08239e-14	0.0119224	28418	12	0.0888671	eqtl-a-ENSG00000052749	rs3184504	C	T	0.542056	RRP12	TRUE	reported	igd	0.00195124985789659	55.5551178778541
16170764	3.06288e-08	0.0118983	31569	17	0.0658905	eqtl-a-ENSG00000052749	rs7210990	A	C	0.481977	RRP12	TRUE	reported	igd	0.00097049491930647	30.6653737071288
50370254	1.88101e-08	0.016663	30037	7	0.0936925	eqtl-a-ENSG00000053254	rs149007767	T	C	0.149708	FOXN3	TRUE	reported	igd	0.00105145291938512	31.6136286758958
89824529	5.42375e-16	0.0154421	30122	14	-0.125103	eqtl-a-ENSG00000053254	rs2241123	A	G	0.180412	FOXN3	TRUE	reported	igd	0.00217417083162857	65.628713483225
89914111	3.19669e-12	0.0259411	29790	14	0.180781	eqtl-a-ENSG00000053254	rs11845173	C	T	0.0555443	FOXN3	TRUE	reported	igd	0.00162761187997696	48.5623433276733
19638309	1.79061e-169	0.0131441	31261	1	0.364734	eqtl-a-ENSG00000053371	rs2227295	G	A	0.735737	AKR7A2	TRUE	reported	igd	0.0240392155145142	769.950852240802
19881561	5.88979e-13	0.032317	25906	1	0.232786	eqtl-a-ENSG00000053371	rs114931199	T	C	0.0350199	AKR7A2	TRUE	reported	igd	0.00199885971576332	51.8821672512181
19344952	1.22011e-23	0.0118614	31568	1	-0.118874	eqtl-a-ENSG00000053371	rs7547804	C	A	0.50134	AKR7A2	TRUE	reported	igd	0.00317157652403239	100.432513961135
19537755	6.6115e-12	0.0165343	31684	1	-0.11352	eqtl-a-ENSG00000053371	rs10158092	A	C	0.152354	AKR7A2	TRUE	reported	igd	0.0014855507317811	47.1352400746745
25026195	6.95665e-11	0.0169835	31355	4	0.110763	eqtl-a-ENSG00000053900	rs2080213	A	G	0.142846	ANAPC4	TRUE	reported	igd	0.00135468864684324	42.5311696371204
25111387	1e-200	0.0114237	28917	4	-0.423245	eqtl-a-ENSG00000053900	rs6852497	A	G	0.44883	ANAPC4	TRUE	reported	igd	0.0453184839314551	1372.58754969332
25559877	6.74217e-12	0.0121201	29155	4	0.0831815	eqtl-a-ENSG00000053900	rs7658843	T	A	0.401723	ANAPC4	TRUE	reported	igd	0.00161297253601848	47.0989576677399
25457661	2.60675e-35	0.0151528	30746	4	-0.187894	eqtl-a-ENSG00000053900	rs1996183	A	C	0.187936	ANAPC4	TRUE	reported	igd	0.00497605248292981	153.748819731366
25048652	7.80908e-21	0.0188043	31231	4	-0.176047	eqtl-a-ENSG00000053900	rs987350	T	G	0.112135	ANAPC4	TRUE	reported	igd	0.00279859405202403	87.6425696247141
139621919	2.93853e-09	0.0302856	20635	9	0.179742	eqtl-a-ENSG00000054148	rs945382	G	C	0.959865	PHPT1	TRUE	reported	igd	0.00170404717134632	35.2196211822401
139940653	1.09159e-09	0.0119671	21039	9	-0.072943	eqtl-a-ENSG00000054148	rs28705707	A	C	0.442558	PHPT1	TRUE	reported	igd	0.00176277980756012	37.149084467611
139736198	1e-200	0.0144988	27310	9	-0.442903	eqtl-a-ENSG00000054148	rs2077581	C	A	0.803216	PHPT1	TRUE	reported	igd	0.0330399923501861	933.085240300482
139936141	7.81808e-39	0.0238306	19532	9	0.310615	eqtl-a-ENSG00000054179	rs13289619	A	G	0.0659888	ENTPD2	TRUE	reported	igd	0.00862316992063145	169.875372754525
139969197	1e-200	0.0119139	21095	9	-0.378221	eqtl-a-ENSG00000054179	rs11794029	C	G	0.369351	ENTPD2	TRUE	reported	igd	0.0455969371176881	1007.72538566548
16170764	8.07737e-10	0.0118953	31569	17	-0.0730755	eqtl-a-ENSG00000054179	rs7210990	A	C	0.481977	ENTPD2	TRUE	reported	igd	0.00119402411827053	37.7368180122995
160759705	2.55094e-58	0.0287565	25443	2	0.462974	eqtl-a-ENSG00000054219	rs12692574	C	T	0.956	LY75	TRUE	reported	igd	0.010084881310645	259.183298224414
160908063	1.09977e-19	0.0390539	21459	2	-0.354547	eqtl-a-ENSG00000054219	rs76797039	T	C	0.0236498	LY75	TRUE	reported	igd	0.00382599620152225	82.409699694061
161378675	5.18263e-09	0.0437883	21376	2	0.255781	eqtl-a-ENSG00000054219	rs75131375	T	C	0.0187827	LY75	TRUE	reported	igd	0.00159368055115256	34.1177008165762
160677559	1e-200	0.0115956	26405	2	0.373933	eqtl-a-ENSG00000054219	rs62175229	T	C	0.567998	LY75	TRUE	reported	igd	0.0378912664958456	1039.84411995309
241807644	6.77798e-22	0.0340273	22600	1	0.327241	eqtl-a-ENSG00000054277	rs72768044	C	G	0.0313793	OPN3	TRUE	reported	igd	0.00407566376112998	92.4787620130261
241905190	8.93511e-13	0.0118862	23727	1	0.0849366	eqtl-a-ENSG00000054277	rs6660811	G	A	0.513286	OPN3	TRUE	reported	igd	0.00214747051566285	51.0583843590897
241775724	1e-200	0.0118505	23173	1	0.471522	eqtl-a-ENSG00000054277	rs658729	T	C	0.652313	OPN3	TRUE	reported	igd	0.0639509385341198	1583.04436997516
39972125	5.18263e-09	0.0118974	23842	7	0.069496	eqtl-a-ENSG00000054277	rs10243593	A	G	0.481416	OPN3	TRUE	reported	igd	0.00142906416314196	34.1176459544685
243511901	1.84884e-31	0.0197217	14261	1	0.230123	eqtl-a-ENSG00000054282	rs80076701	C	G	0.100256	SDCCAG8	TRUE	reported	igd	0.00945702851778232	136.135204142912
243080833	8.37915e-13	0.0124755	14263	1	0.0892623	eqtl-a-ENSG00000054282	rs11576569	T	C	0.34761	SDCCAG8	TRUE	reported	igd	0.00357645958604928	51.1869582441417
243207082	1e-200	0.0119863	10248	1	0.370117	eqtl-a-ENSG00000054282	rs12093457	T	C	0.362	SDCCAG8	TRUE	reported	igd	0.085120211963522	953.28556077301
220243295	2.11057e-13	0.0205703	31684	2	0.151019	eqtl-a-ENSG00000054356	rs6717249	A	G	0.90817	PTPRN	TRUE	reported	igd	0.00169825832980399	53.8957493100568
220145286	1e-200	0.0159429	31683	2	0.484302	eqtl-a-ENSG00000054356	rs2276638	T	C	0.154765	PTPRN	TRUE	reported	igd	0.0283010986598029	922.721128329554
56849749	2.73439e-09	0.012235	31684	3	0.0727593	eqtl-a-ENSG00000054356	rs1354034	C	T	0.618137	PTPRN	TRUE	reported	igd	0.00111492228864172	35.3623942702988
54712308	4.18167e-08	0.0120886	31684	12	0.0662804	eqtl-a-ENSG00000054356	rs10876550	A	G	0.590064	PTPRN	TRUE	reported	igd	0.000947908363938472	30.0601270321335
33944055	1.37626e-13	0.0155539	31185	17	0.115079	eqtl-a-ENSG00000054356	rs16971217	G	C	0.177288	PTPRN	TRUE	reported	igd	0.00175229058605269	54.7375935146999
10199413	1.32312e-91	0.0346489	27924	1	-0.703321	eqtl-a-ENSG00000054523	rs114227524	C	T	0.0295418	KIF1B	TRUE	reported	igd	0.0145408324864616	411.999946899273
10283428	5.27837e-33	0.0394998	24875	1	-0.472698	eqtl-a-ENSG00000054523	rs78051618	C	A	0.023005	KIF1B	TRUE	reported	igd	0.00572428802207939	143.199933638068
10628463	3.48779e-08	0.0355655	25546	1	0.196151	eqtl-a-ENSG00000054523	rs144911531	G	A	0.0287724	KIF1B	TRUE	reported	igd	0.00118927832450344	30.4150975373546
10225510	1.23709e-11	0.0504348	18215	1	-0.341731	eqtl-a-ENSG00000054523	rs74676568	A	G	0.0140791	KIF1B	TRUE	reported	igd	0.00251411842468706	45.9050495998105
10384341	3.5156e-196	0.0446803	23188	1	1.33508	eqtl-a-ENSG00000054523	rs74858192	C	T	0.0169768	KIF1B	TRUE	reported	igd	0.037077501530686	892.781040901062
9983222	1e-200	0.031317	23975	1	1.06542	eqtl-a-ENSG00000054523	rs12406876	C	A	0.0345767	KIF1B	TRUE	reported	igd	0.0460518963695058	1157.29787340066
10141346	9.27897e-30	0.0275544	31239	1	-0.312196	eqtl-a-ENSG00000054523	rs12068865	A	G	0.0485973	KIF1B	TRUE	reported	igd	0.00409255577619096	128.364503671837
10257752	1e-200	0.0334356	26884	1	1.19249	eqtl-a-ENSG00000054523	rs6541082	G	T	0.0299647	KIF1B	TRUE	reported	igd	0.0451772827519162	1271.9174910681
10568140	2.54683e-111	0.0466923	25930	1	1.04682	eqtl-a-ENSG00000054523	rs79776554	T	C	0.0159434	KIF1B	TRUE	reported	igd	0.0190157305557298	502.597113130337
10689678	1.59184e-15	0.0458555	20548	1	-0.365446	eqtl-a-ENSG00000054523	rs36083022	A	G	0.017062	KIF1B	TRUE	reported	igd	0.00308143976938065	63.5069543564811
28724374	1.90239e-17	0.0130939	31355	7	-0.111291	eqtl-a-ENSG00000054523	rs56388170	T	G	0.289189	KIF1B	TRUE	reported	igd	0.00229866560667375	72.2361094263402
28724374	3.6241e-22	0.013084	31141	7	-0.126667	eqtl-a-ENSG00000054654	rs56388170	T	G	0.289189	SYNE2	TRUE	reported	igd	0.0030006009378014	93.7169196792752
111910219	5.9406e-10	0.0119106	28204	12	-0.0737505	eqtl-a-ENSG00000054654	rs10774625	G	A	0.53123	SYNE2	TRUE	reported	igd	0.00135756917136366	38.3382125462358
64696813	1.8578e-146	0.0117108	30836	14	-0.301804	eqtl-a-ENSG00000054654	rs1760988	G	A	0.557555	SYNE2	TRUE	reported	igd	0.0210845340454424	664.123252075935
64173850	4.84953e-21	0.0324512	30419	14	-0.30544	eqtl-a-ENSG00000054654	rs11158502	T	C	0.0346271	SYNE2	TRUE	reported	igd	0.00290390485366704	88.5853172667649
63972057	2.26725e-13	0.0419315	10541	14	-0.307434	eqtl-a-ENSG00000054654	rs147147388	T	C	0.0204903	SYNE2	TRUE	reported	igd	0.00507378494043066	53.7453116400166
56849749	2.16172e-49	0.0121567	26395	3	0.1796	eqtl-a-ENSG00000054793	rs1354034	C	T	0.618137	ATP9A	TRUE	reported	igd	0.00820130816037817	218.247037486376
122365583	8.50354e-11	0.0193738	25896	12	0.125765	eqtl-a-ENSG00000054793	rs7961894	T	C	0.105151	ATP9A	TRUE	reported	igd	0.00162461756153883	42.1363025155314
50458823	4.72172e-37	0.0361376	25966	20	-0.45958	eqtl-a-ENSG00000054793	rs73913735	T	C	0.0275783	ATP9A	TRUE	reported	igd	0.00619015991290316	161.722399492978
1931582	6.64049e-12	0.0123823	26395	20	-0.0850057	eqtl-a-ENSG00000054793	rs6045615	C	A	0.35954	ATP9A	TRUE	reported	igd	0.00178236655037621	47.1259961632939
50201820	7.12525e-68	0.029556	25949	20	0.514528	eqtl-a-ENSG00000054793	rs11696348	A	C	0.0414134	ATP9A	TRUE	reported	igd	0.011544186787562	303.035310808067
50235760	1e-200	0.0167473	26395	20	0.525292	eqtl-a-ENSG00000054793	rs13040403	G	A	0.136777	ATP9A	TRUE	reported	igd	0.0359333227970829	983.737132513493
50418142	1e-200	0.0169606	26279	20	-0.516708	eqtl-a-ENSG00000054793	rs13040027	A	G	0.133318	ATP9A	TRUE	reported	igd	0.0341134187422361	928.057519054113
1819280	1.77542e-11	0.0118886	25086	20	0.0799329	eqtl-a-ENSG00000054793	rs156356	C	T	0.48686	ATP9A	TRUE	reported	igd	0.00179877312531078	45.2017327373611
144385777	1.63271e-08	0.0266277	25735	6	0.150372	eqtl-a-ENSG00000054967	rs149110519	T	C	0.0526158	RELT	TRUE	reported	igd	0.00123766931252285	31.888411727771
73751481	1.64161e-09	0.0152316	31684	11	0.0918453	eqtl-a-ENSG00000054967	rs12417424	T	G	0.187418	RELT	TRUE	reported	igd	0.00114626416511475	36.3576167123317
73011106	1e-200	0.0136368	31684	11	0.477692	eqtl-a-ENSG00000054967	rs11824050	A	C	0.226596	RELT	TRUE	reported	igd	0.0372845520844982	1226.99722093246
88589975	9.75439e-14	0.0474316	20510	14	-0.353086	eqtl-a-ENSG00000054983	rs111291798	A	C	0.0159378	GALC	TRUE	reported	igd	0.00269456071344452	55.409354982413
88334447	2.21269e-10	0.0359567	28251	14	0.228178	eqtl-a-ENSG00000054983	rs12886434	T	C	0.028111	GALC	TRUE	reported	igd	0.00142342776488146	40.2677291338142
88391492	1e-200	0.0156393	30159	14	-0.512083	eqtl-a-ENSG00000054983	rs77593588	G	A	0.160301	GALC	TRUE	reported	igd	0.0343287859080413	1072.05556251594
50427982	3.43005e-41	0.0118887	31684	7	0.159809	eqtl-a-ENSG00000055118	rs6592965	A	G	0.449532	KCNH2	TRUE	reported	igd	0.00567053500745475	180.678433488369
150557748	9.76787e-14	0.0128116	31684	7	-0.0953666	eqtl-a-ENSG00000055118	rs3735076	A	G	0.312845	KCNH2	TRUE	reported	igd	0.00174576994300969	55.4062098302106
150647969	1.78443e-75	0.0135515	25857	7	0.249123	eqtl-a-ENSG00000055118	rs2072413	T	C	0.251769	KCNH2	TRUE	reported	igd	0.0129013551780531	337.924218494627
80800318	2.96319e-08	0.0127956	31569	10	0.070936	eqtl-a-ENSG00000055118	rs11002791	A	G	0.315303	KCNH2	TRUE	reported	igd	0.000972587448058415	30.7315570995543
33946107	5.16654e-25	0.0119441	31355	17	-0.123379	eqtl-a-ENSG00000055118	rs225245	G	A	0.440335	KCNH2	TRUE	reported	igd	0.00339151237970441	106.695948270295
56849749	4.03869e-09	0.0122354	31684	3	-0.0719769	eqtl-a-ENSG00000055163	rs1354034	C	T	0.618137	CYFIP2	TRUE	reported	igd	0.00109102786185859	34.6036983183926
156748889	1.64968e-49	0.0133259	26492	5	0.197119	eqtl-a-ENSG00000055163	rs11957485	G	A	0.268553	CYFIP2	TRUE	reported	igd	0.0081917529001931	218.791822875696
156631551	2.58488e-09	0.012022	31566	5	0.0716031	eqtl-a-ENSG00000055163	rs2421471	G	A	0.425711	CYFIP2	TRUE	reported	igd	0.0011225426818397	35.4717557694393
156863876	5.85599e-13	0.0119618	26563	5	-0.0861681	eqtl-a-ENSG00000055163	rs61614148	A	G	0.442224	CYFIP2	TRUE	reported	igd	0.00194973349628551	51.888039243008
144385777	6.27047e-61	0.0264053	25735	6	0.434837	eqtl-a-ENSG00000055163	rs149110519	T	C	0.0526158	CYFIP2	TRUE	reported	igd	0.0104278330310736	271.16711276404
54685880	9.03046e-09	0.0256192	29836	12	0.147261	eqtl-a-ENSG00000055163	rs35979828	T	C	0.0571059	CYFIP2	TRUE	reported	igd	0.00110617310027634	33.0381141467975
16430149	2.25512e-08	0.0162896	31569	19	0.0910786	eqtl-a-ENSG00000055163	rs75009320	A	G	0.158241	CYFIP2	TRUE	reported	igd	0.000989284429866245	31.2596662987399
149874899	1e-200	0.0114883	22592	6	-0.507464	eqtl-a-ENSG00000055211	rs4869923	G	T	0.380843	GINM1	TRUE	reported	igd	0.0795001559649488	1951.01447858562
150493980	1.81928e-14	0.0134282	25147	6	-0.102895	eqtl-a-ENSG00000055211	rs1886358	G	A	0.266838	GINM1	TRUE	reported	igd	0.00232945277566831	58.7108542064728
149614405	1.19001e-10	0.0171574	21927	6	-0.110504	eqtl-a-ENSG00000055211	rs575924	C	A	0.139419	GINM1	TRUE	reported	igd	0.0018882218064016	41.4775819801269
37049287	8.72369e-16	0.0122607	31684	2	-0.0986193	eqtl-a-ENSG00000055332	rs2372715	A	G	0.375775	EIF2AK2	TRUE	reported	igd	0.00203782729190572	64.6942800316356
37299145	1.02802e-102	0.013391	31684	2	-0.288161	eqtl-a-ENSG00000055332	rs12621276	A	G	0.257657	EIF2AK2	TRUE	reported	igd	0.014404660328837	463.038358816184
163124051	5.05126e-14	0.0121446	28533	2	0.091456	eqtl-a-ENSG00000055332	rs1990760	T	C	0.603866	EIF2AK2	TRUE	reported	igd	0.0019835731831965	56.7058066070966
159637678	1.58179e-09	0.0188589	30348	3	-0.113826	eqtl-a-ENSG00000055332	rs76830965	A	C	0.111855	EIF2AK2	TRUE	reported	igd	0.00119894469578734	36.4268495163744
50305863	9.63385e-21	0.0127576	31300	7	-0.119154	eqtl-a-ENSG00000055332	rs4917014	G	T	0.316454	EIF2AK2	TRUE	reported	igd	0.00277924135106021	87.2271210271751
32455262	5.97696e-09	0.0126722	31684	9	0.0737217	eqtl-a-ENSG00000055332	rs7045087	C	T	0.326975	EIF2AK2	TRUE	reported	igd	0.00106704560535504	33.8422500930956
139356987	4.49573e-17	0.0130209	27284	9	-0.109362	eqtl-a-ENSG00000055332	rs57994353	C	T	0.294804	EIF2AK2	TRUE	reported	igd	0.00257882234753012	70.5373345399636
50069395	7.69538e-09	0.0119267	31684	10	-0.0688753	eqtl-a-ENSG00000055332	rs2663052	A	G	0.46054	EIF2AK2	TRUE	reported	igd	0.00105145219433251	33.3471713773621
44856641	2.90643e-09	0.0153248	31239	17	0.0909789	eqtl-a-ENSG00000055332	rs199515	C	G	0.815503	EIF2AK2	TRUE	reported	igd	0.00112695066692491	35.2422742872455
76905822	1.3406e-11	0.0356375	30966	17	-0.241052	eqtl-a-ENSG00000055483	rs57816430	A	G	0.0286208	USP36	TRUE	reported	igd	0.00147530128244569	45.7487220579708
76747208	2.11349e-167	0.0309335	25631	17	-0.853047	eqtl-a-ENSG00000055483	rs117781742	T	G	0.0364561	USP36	TRUE	reported	igd	0.0288153601169602	760.420659583859
76877067	1.56207e-11	0.0382182	25266	17	0.257671	eqtl-a-ENSG00000055483	rs139678865	A	G	0.0247887	USP36	TRUE	reported	igd	0.00179586423442888	45.4523402508387
77027877	1.24051e-22	0.0248122	27604	17	-0.242916	eqtl-a-ENSG00000055483	rs12949190	A	G	0.0608538	USP36	TRUE	reported	igd	0.00346022480243797	95.8407555563535
76639714	1e-200	0.0124575	31470	17	0.394238	eqtl-a-ENSG00000055483	rs12950719	A	G	0.307997	USP36	TRUE	reported	igd	0.0308427215455038	1001.44608431528
85467130	9.73644e-81	0.0128492	31470	1	-0.244511	eqtl-a-ENSG00000055732	rs12119445	A	G	0.297982	MCOLN3	TRUE	reported	igd	0.0113757267604722	362.090411279847
85070877	4.75062e-08	0.0124533	31470	1	-0.0679977	eqtl-a-ENSG00000055732	rs2911603	C	T	0.351441	MCOLN3	TRUE	reported	igd	0.000946480251389149	29.8120570739875
112007756	4.37381e-09	0.0119272	28204	12	-0.0700044	eqtl-a-ENSG00000055732	rs653178	T	C	0.539991	MCOLN3	TRUE	reported	igd	0.00121992417043102	34.4463233569413
68591230	9.6917e-13	0.0143505	30971	16	-0.10239	eqtl-a-ENSG00000055732	rs1728785	C	A	0.780371	MCOLN3	TRUE	reported	igd	0.00164101489353368	50.9041246645614
102979243	1.56041e-09	0.0362968	26943	10	-0.21916	eqtl-a-ENSG00000055950	rs77380815	T	C	0.027579	MRPL43	TRUE	reported	igd	0.00135130285800323	36.4547116535101
102547376	2.48028e-18	0.0243947	25692	10	-0.213036	eqtl-a-ENSG00000055950	rs41300237	G	A	0.0631991	MRPL43	TRUE	reported	igd	0.00295957865990169	76.2572651474674
102643010	1e-200	0.0128208	31470	10	0.420663	eqtl-a-ENSG00000055950	rs11595160	A	G	0.723082	MRPL43	TRUE	reported	igd	0.0330775459451519	1076.49192697618
102920746	8.03156e-11	0.0141142	31141	10	0.0917453	eqtl-a-ENSG00000055950	rs10786623	G	A	0.230346	MRPL43	TRUE	reported	igd	0.00135498254594177	42.250049577824
53541364	5.098e-17	0.0234532	26280	3	0.196638	eqtl-a-ENSG00000055955	rs312485	G	A	0.931183	ITIH4	TRUE	reported	igd	0.00266775034215706	70.2906614272763
52321809	4.26187e-65	0.0416107	18397	3	-0.708971	eqtl-a-ENSG00000055955	rs141250728	C	A	0.0204653	ITIH4	TRUE	reported	igd	0.0155346095775032	290.26834864711
51879279	3.90481e-12	0.0149991	25858	3	0.104104	eqtl-a-ENSG00000055955	rs7639080	G	A	0.194911	ITIH4	TRUE	reported	igd	0.00185952135224215	48.1693560296339
52913939	3.25087e-175	0.0326166	23557	3	-0.920464	eqtl-a-ENSG00000055955	rs11716402	T	C	0.0325806	ITIH4	TRUE	reported	igd	0.0327021626953958	796.341532651932
52241835	1e-200	0.0118073	26609	3	0.419377	eqtl-a-ENSG00000055955	rs6802320	C	T	0.370551	ITIH4	TRUE	reported	igd	0.0452649788087116	1261.4655003025
123764575	9.97241e-15	0.0217623	27182	9	-0.168431	eqtl-a-ENSG00000056558	rs182550311	C	T	0.0810494	TRAF1	TRUE	reported	igd	0.00219885735855481	59.8966471889439
123148937	1.02944e-17	0.0318752	29911	9	-0.27319	eqtl-a-ENSG00000056558	rs7028860	T	G	0.0359785	TRAF1	TRUE	reported	igd	0.00244978287322428	73.4504937168023
123722148	2.85759e-120	0.0131976	31644	9	0.307751	eqtl-a-ENSG00000056558	rs4310279	A	G	0.732741	TRAF1	TRUE	reported	igd	0.016893445633905	543.727843512033
53742331	1.44139e-08	0.0124561	31684	3	-0.0706088	eqtl-a-ENSG00000056736	rs2612015	T	G	0.649029	IL17RB	TRUE	reported	igd	0.00101314885145834	32.1311355349664
53794134	3.73508e-21	0.0144722	30077	3	0.136616	eqtl-a-ENSG00000056736	rs79589055	A	G	0.213763	IL17RB	TRUE	reported	igd	0.00295402853910829	89.1056288844015
53899565	5.34564e-114	0.0123378	31684	3	-0.279971	eqtl-a-ENSG00000056736	rs709324	C	T	0.340374	IL17RB	TRUE	reported	igd	0.0159922351159204	514.900401220186
99394613	6.11928e-13	0.0361523	27568	3	0.26022	eqtl-a-ENSG00000057019	rs150747167	A	C	0.0277754	DCBLD2	TRUE	reported	igd	0.00187580980519145	51.8057508252709
98783917	1.2933e-11	0.0431798	27571	3	-0.292297	eqtl-a-ENSG00000057019	rs114582351	C	T	0.0193103	DCBLD2	TRUE	reported	igd	0.00165925731155825	45.8200921452578
98912719	4.53628e-14	0.0204363	30262	3	-0.154179	eqtl-a-ENSG00000057019	rs1066357	G	A	0.0931549	DCBLD2	TRUE	reported	igd	0.0018772936831018	56.9137506752849
98490449	1e-200	0.0227432	30430	3	0.737703	eqtl-a-ENSG00000057019	rs56094988	C	G	0.0684133	DCBLD2	TRUE	reported	igd	0.0334192089697197	1052.03796720059
98585142	5.93608e-87	0.0124055	26857	3	-0.245195	eqtl-a-ENSG00000057019	rs13071075	G	A	0.33869	DCBLD2	TRUE	reported	igd	0.014337238946249	390.627065478148
179330173	4.7863e-163	0.0131397	25373	1	-0.357548	eqtl-a-ENSG00000057252	rs11581659	T	C	0.265361	SOAT1	TRUE	reported	igd	0.0283552509537582	740.39516258793
179310932	6.14611e-55	0.0269437	28304	1	0.420616	eqtl-a-ENSG00000057252	rs149770566	G	T	0.0505187	SOAT1	TRUE	reported	igd	0.00853662043433146	243.683666499401
178659370	1.25112e-12	0.0416924	22002	1	-0.295995	eqtl-a-ENSG00000057252	rs111491640	A	C	0.0207361	SOAT1	TRUE	reported	igd	0.00228559375716271	50.3982525890691
179007895	6.03671e-63	0.0419099	25836	1	-0.701828	eqtl-a-ENSG00000057252	rs74568172	G	A	0.0201821	SOAT1	TRUE	reported	igd	0.0107377745804947	280.410654914946
179082830	1e-200	0.0284894	31564	1	-0.86932	eqtl-a-ENSG00000057252	rs28913876	A	G	0.0427725	SOAT1	TRUE	reported	igd	0.0286533207871577	931.033306684221
5701833	1e-200	0.0137212	14263	10	-0.475818	eqtl-a-ENSG00000057608	rs871749	A	G	0.223195	GDI2	TRUE	reported	igd	0.0777557672220349	1202.36587765185
5510684	9.13692e-11	0.0332216	11495	10	-0.215289	eqtl-a-ENSG00000057608	rs139635806	A	G	0.0330959	GDI2	TRUE	reported	igd	0.00364007111684861	41.9881772973703
5854393	1.14183e-33	0.0173351	14260	10	0.209643	eqtl-a-ENSG00000057608	rs7902987	T	C	0.134857	GDI2	TRUE	reported	igd	0.0101521250514365	146.23358058015
5898205	2.9662e-44	0.012168	9176	10	-0.169793	eqtl-a-ENSG00000057608	rs12780246	A	G	0.381655	GDI2	TRUE	reported	igd	0.020779179538222	194.673345480699
148200011	2.113e-17	0.0120366	31569	5	-0.102161	eqtl-a-ENSG00000057704	rs56330463	C	T	0.582097	TMCC3	TRUE	reported	igd	0.0022767318841259	72.0335965722465
95057450	1e-200	0.0126894	31684	12	-0.414753	eqtl-a-ENSG00000057704	rs4237890	T	G	0.286726	TMCC3	TRUE	reported	igd	0.0326178231679496	1068.24158885283
95326129	4.9488e-19	0.0258558	31569	12	0.230468	eqtl-a-ENSG00000057704	rs249162	C	A	0.0558051	TMCC3	TRUE	reported	igd	0.00251045726498776	79.4470529150411
95053135	8.88178e-13	0.014085	31355	12	-0.100666	eqtl-a-ENSG00000057704	rs2651980	C	T	0.768493	TMCC3	TRUE	reported	igd	0.00162644052671057	51.0768633144283
248039451	1.6819e-18	0.0125516	25690	1	-0.11016	eqtl-a-ENSG00000057757	rs3811444	T	C	0.337611	PITHD1	TRUE	reported	igd	0.00298940902242901	77.0221897972637
24077451	1.54882e-09	0.0228378	24976	1	-0.137922	eqtl-a-ENSG00000057757	rs2235541	T	C	0.0730836	PITHD1	TRUE	reported	igd	0.00145814914570096	36.4689939971774
173363667	1.18831e-08	0.012088	25690	5	0.0689199	eqtl-a-ENSG00000057757	rs17076724	T	G	0.409824	PITHD1	TRUE	reported	igd	0.0012637671903639	32.5047299973703
139840693	3.58509e-25	0.0118829	25575	6	0.123164	eqtl-a-ENSG00000057757	rs592423	C	A	0.532047	PITHD1	TRUE	reported	igd	0.00418298766978781	107.420883912367
50427982	1.75509e-18	0.0119321	25690	7	0.104669	eqtl-a-ENSG00000057757	rs6592965	A	G	0.449532	PITHD1	TRUE	reported	igd	0.00298634091888305	76.9429032647048
33946107	3.83884e-12	0.0119687	25361	17	0.0831002	eqtl-a-ENSG00000057757	rs225245	G	A	0.440335	PITHD1	TRUE	reported	igd	0.00189722598338682	48.2032060877785
4157072	3.52939e-11	0.0123338	25575	20	0.0816816	eqtl-a-ENSG00000057757	rs6084653	G	C	0.36636	PITHD1	TRUE	reported	igd	0.00171196504255547	43.8551605350426
203704459	9.45802e-17	0.0153812	31017	1	0.12784	eqtl-a-ENSG00000058668	rs16852249	C	T	0.182195	ATP2B4	TRUE	reported	igd	0.00222222036556182	69.0756659896269
61650831	2.75708e-08	0.0155307	31355	8	-0.0862886	eqtl-a-ENSG00000058668	rs7846314	T	A	0.178349	ATP2B4	TRUE	reported	igd	0.000983536822942219	30.8671890267359
111904371	9.54553e-20	0.0118917	28203	12	0.108144	eqtl-a-ENSG00000058668	rs4766578	A	T	0.531061	ATP2B4	TRUE	reported	igd	0.00292381577491837	82.6963174660077
54337886	3.78791e-57	0.0118187	31644	1	-0.188298	eqtl-a-ENSG00000058799	rs10888811	A	G	0.529633	YIPF1	TRUE	reported	igd	0.00795775905645241	253.819244455535
54587634	2.87674e-18	0.0479164	29219	1	-0.417649	eqtl-a-ENSG00000058799	rs12094458	T	G	0.0155888	YIPF1	TRUE	reported	igd	0.00259335182292522	75.9669692886931
38143548	6.01035e-12	0.0119211	31643	17	-0.0820109	eqtl-a-ENSG00000058799	rs4065321	T	C	0.539612	YIPF1	TRUE	reported	igd	0.00149342621656968	47.3241740807308
185987803	1.32388e-10	0.0121937	30847	3	-0.0783385	eqtl-a-ENSG00000058866	rs2268832	T	G	0.611594	DGKG	TRUE	reported	igd	0.00133624424023818	41.2716025313145
50370254	7.56136e-21	0.01663	30077	7	-0.155748	eqtl-a-ENSG00000058866	rs149007767	T	C	0.149708	DGKG	TRUE	reported	igd	0.00290777816550327	87.7064592547053
44487404	4.6904e-09	0.0119821	31684	21	0.0701873	eqtl-a-ENSG00000058866	rs2851391	C	T	0.562178	DGKG	TRUE	reported	igd	0.00108178541093315	34.3102417081094
2977365	1e-200	0.0115531	27070	16	0.355993	eqtl-a-ENSG00000059122	rs4786352	T	C	0.463492	FLYWCH1	TRUE	reported	igd	0.0338864270452784	949.409917155344
2988670	1e-200	0.013783	26647	16	0.47941	eqtl-a-ENSG00000059122	rs10221115	G	C	0.220262	FLYWCH1	TRUE	reported	igd	0.0434305041452203	1209.74564625368
3069364	1.75995e-15	0.0125612	23849	16	0.0999544	eqtl-a-ENSG00000059122	rs2717704	C	T	0.337222	FLYWCH1	TRUE	reported	igd	0.00264801143618836	63.3147869988366
85806068	7.60309e-10	0.0120484	31355	2	-0.074134	eqtl-a-ENSG00000059377	rs3731827	C	T	0.418566	TBXAS1	TRUE	reported	igd	0.00120599424321204	37.8571930643267
173205318	2.25268e-16	0.0137059	31355	5	-0.112498	eqtl-a-ENSG00000059377	rs2594836	A	G	0.749651	TBXAS1	TRUE	reported	igd	0.00214405306733548	67.3669341018673
139919975	8.76799e-11	0.0177133	29947	7	-0.114899	eqtl-a-ENSG00000059377	rs62491768	C	G	0.129275	TBXAS1	TRUE	reported	igd	0.00140304130955729	42.0731023152627
139645624	4.83059e-118	0.0213682	31355	7	0.49357	eqtl-a-ENSG00000059377	rs740149	G	A	0.0813769	TBXAS1	TRUE	reported	igd	0.0167311997206308	533.499389680517
139718147	1e-200	0.0118041	31077	7	-0.412889	eqtl-a-ENSG00000059377	rs2240395	G	C	0.373303	TBXAS1	TRUE	reported	igd	0.0378784097818235	1223.41250413396
139334182	5.08405e-09	0.0209755	27211	7	0.122591	eqtl-a-ENSG00000059377	rs6969911	C	A	0.0880761	TBXAS1	TRUE	reported	igd	0.00125372763947676	34.1554970331937
142337790	1.64589e-10	0.0124608	24729	8	-0.079638	eqtl-a-ENSG00000059377	rs6986779	T	C	0.349935	TBXAS1	TRUE	reported	igd	0.00164901852003713	40.8426312002143
234607375	6.18586e-22	0.0220461	31684	1	-0.212225	eqtl-a-ENSG00000059588	rs6697268	T	C	0.0785824	TARBP1	TRUE	reported	igd	0.00291622603372748	92.6620968196392
234456245	8.74782e-31	0.0126	31668	1	0.145348	eqtl-a-ENSG00000059588	rs594646	A	T	0.329824	TARBP1	TRUE	reported	igd	0.00418442039793273	133.060637968616
234761817	1.37246e-12	0.0149978	31553	1	-0.106285	eqtl-a-ENSG00000059588	rs12731560	A	G	0.194917	TARBP1	TRUE	reported	igd	0.00158912289359324	50.2182193377855
234610539	4.45656e-177	0.0115851	26486	1	0.328695	eqtl-a-ENSG00000059588	rs500513	G	C	0.482444	TARBP1	TRUE	reported	igd	0.0294962934636406	804.922053187224
130374461	2.00461e-08	0.0135848	31569	6	-0.0762353	eqtl-a-ENSG00000059588	rs7740107	A	T	0.741827	TARBP1	TRUE	reported	igd	0.000996579339884802	31.4904027068859
152776374	4.99804e-11	0.0172876	24612	4	0.1136	eqtl-a-ENSG00000059691	rs9884140	T	A	0.13691	GATB	TRUE	reported	igd	0.00175137467924728	43.1769498730104
152457180	1e-200	0.0122138	24823	4	-0.3828	eqtl-a-ENSG00000059691	rs2120098	A	T	0.332698	GATB	TRUE	reported	igd	0.0380656639815204	982.216571659178
152607815	9.03649e-100	0.0128324	17591	4	-0.272078	eqtl-a-ENSG00000059691	rs74378409	G	A	0.296225	GATB	TRUE	reported	igd	0.0249184758367372	449.491720057436
153114071	9.82675e-10	0.033537	23497	4	0.204992	eqtl-a-ENSG00000059691	rs2003377	A	G	0.0324657	GATB	TRUE	reported	igd	0.00158753380391601	37.3584144688366
70128317	1.5332e-27	0.0119475	21105	2	0.129917	eqtl-a-ENSG00000059728	rs10187817	A	G	0.437544	MXD1	TRUE	reported	igd	0.00557142294189651	118.232461390711
148200011	8.28133e-15	0.0120416	31355	5	-0.0934825	eqtl-a-ENSG00000059728	rs56330463	C	T	0.582097	MXD1	TRUE	reported	igd	0.00191845432404149	60.2649139063446
50370254	4.04362e-09	0.0166612	29863	7	0.0980079	eqtl-a-ENSG00000059728	rs149007767	T	C	0.149708	MXD1	TRUE	reported	igd	0.00115737273236883	34.6003526659715
148200011	3.1067e-14	0.0120427	28802	5	-0.0914498	eqtl-a-ENSG00000059804	rs56330463	C	T	0.582097	SLC2A3	TRUE	reported	igd	0.00199814264278403	57.6617244626855
28724374	1.15239e-14	0.0130997	28588	7	-0.101144	eqtl-a-ENSG00000059804	rs56388170	T	G	0.289189	SLC2A3	TRUE	reported	igd	0.00208098559751186	59.6111041396403
8069058	6.07575e-16	0.0150921	24516	12	-0.122065	eqtl-a-ENSG00000059804	rs7967655	A	G	0.808537	SLC2A3	TRUE	reported	igd	0.00266119113914902	65.4105094532633
8142798	1.47231e-163	0.0116208	28917	12	-0.316719	eqtl-a-ENSG00000059804	rs7304465	T	C	0.528336	SLC2A3	TRUE	reported	igd	0.0250442399342406	742.755956075099
139840693	4.58775e-25	0.0118831	26494	6	0.122885	eqtl-a-ENSG00000060138	rs592423	C	A	0.532047	YBX3	TRUE	reported	igd	0.0040201408384214	106.93145058286
50427982	5.58856e-17	0.011935	26609	7	-0.0999365	eqtl-a-ENSG00000060138	rs6592965	A	G	0.449532	YBX3	TRUE	reported	igd	0.00262804032503769	70.1085169379192
135860412	2.65399e-11	0.0326881	23337	9	0.217853	eqtl-a-ENSG00000060138	rs73660574	A	G	0.0342189	YBX3	TRUE	reported	igd	0.00189966451052802	44.4130412314033
10596936	1.84289e-33	0.0149643	21104	12	0.180386	eqtl-a-ENSG00000060138	rs7968282	T	C	0.194347	YBX3	TRUE	reported	igd	0.00683829811717199	145.295339716581
10912680	1.64589e-12	0.018018	26156	12	-0.127236	eqtl-a-ENSG00000060138	rs59174975	C	T	0.12414	YBX3	TRUE	reported	igd	0.00190286653911136	49.8624530573994
10867400	7.39605e-167	0.0122292	26156	12	-0.336687	eqtl-a-ENSG00000060138	rs7302837	T	C	0.341222	YBX3	TRUE	reported	igd	0.028162986534647	757.920041757513
55977759	1.02341e-08	0.0148404	26493	20	0.0849881	eqtl-a-ENSG00000060138	rs11905479	A	G	0.200782	YBX3	TRUE	reported	igd	0.00123639316731209	32.7938374718446
4157072	7.85597e-17	0.0123226	26494	20	-0.102688	eqtl-a-ENSG00000060138	rs6084653	G	C	0.36636	YBX3	TRUE	reported	igd	0.00261426920466698	69.4387513593268
50370254	1.77664e-13	0.0166497	30077	7	-0.122615	eqtl-a-ENSG00000060558	rs149007767	T	C	0.149708	GNA15	TRUE	reported	igd	0.00179993762985303	54.2307361605398
3136091	2.94307e-17	0.0301094	19488	19	0.254391	eqtl-a-ENSG00000060558	rs117552144	T	C	0.040519	GNA15	TRUE	reported	igd	0.00364959031342927	71.376411507528
3155736	1.7334e-39	0.0129703	27399	19	0.170542	eqtl-a-ENSG00000060558	rs2074864	C	T	0.295108	GNA15	TRUE	reported	igd	0.00627041332398706	172.874508458489
130968456	1.24165e-118	0.0134049	30688	12	0.310416	eqtl-a-ENSG00000060709	rs11060939	A	G	0.254888	RIMBP2	TRUE	reported	igd	0.017173907986117	536.207315560912
130978049	1.0162e-08	0.028779	30966	12	0.164846	eqtl-a-ENSG00000060709	rs149345397	A	G	0.0446658	RIMBP2	TRUE	reported	igd	0.00105842577442548	32.8078203219421
130976603	3.29913e-30	0.0471403	23363	12	0.538375	eqtl-a-ENSG00000060709	rs112275476	A	G	0.0160523	RIMBP2	TRUE	reported	igd	0.00555186140098343	130.421114137829
32923364	5.11564e-13	0.0212617	26148	11	-0.153554	eqtl-a-ENSG00000060749	rs61889542	C	T	0.0853573	QSER1	TRUE	reported	igd	0.00199077590216828	52.1546549683888
32674559	3.73164e-55	0.0322243	30927	11	0.504074	eqtl-a-ENSG00000060749	rs11031921	T	A	0.0347387	QSER1	TRUE	reported	igd	0.00784984749495428	244.67721258575
32971965	2.09074e-20	0.0471698	15987	11	0.436684	eqtl-a-ENSG00000060749	rs77146504	C	T	0.0160832	QSER1	TRUE	reported	igd	0.00533233608735191	85.6943433960932
166596266	4.2774e-08	0.0200023	25357	6	-0.109593	eqtl-a-ENSG00000060762	rs34172738	C	T	0.0979426	MPC1	TRUE	reported	igd	0.00118248063801336	30.0172914427654
166639992	1e-200	0.013568	25353	6	0.421122	eqtl-a-ENSG00000060762	rs2024981	T	C	0.235672	MPC1	TRUE	reported	igd	0.0366065274904913	963.274201966618
166730737	1.7346e-34	0.0135278	25476	6	0.165679	eqtl-a-ENSG00000060762	rs9366006	G	A	0.741798	MPC1	TRUE	reported	igd	0.00585328704119426	149.98453663203
166725435	2.72961e-71	0.0124507	25023	6	-0.222284	eqtl-a-ENSG00000060762	rs6935275	G	A	0.337093	MPC1	TRUE	reported	igd	0.0125774481255603	318.708873878001
28724374	1.55453e-13	0.0131021	31355	7	-0.0967234	eqtl-a-ENSG00000060982	rs56388170	T	G	0.289189	BCAT1	TRUE	reported	igd	0.00173508315093801	54.4946147191756
25301921	9.00036e-10	0.015276	31179	12	-0.0935872	eqtl-a-ENSG00000060982	rs7966074	T	C	0.814013	BCAT1	TRUE	reported	igd	0.00120234455450526	37.530620913493
25129588	5.70164e-106	0.0128177	31684	12	0.280249	eqtl-a-ENSG00000060982	rs11047735	T	C	0.296403	BCAT1	TRUE	reported	igd	0.014863609782338	478.013897161983
25066607	2.95665e-59	0.0118305	31300	12	0.192042	eqtl-a-ENSG00000060982	rs7305924	T	G	0.539295	BCAT1	TRUE	reported	igd	0.00834835750401284	263.486573271774
24721738	6.69885e-19	0.0353554	29314	12	0.313949	eqtl-a-ENSG00000060982	rs115623448	T	G	0.0290235	BCAT1	TRUE	reported	igd	0.00268265600036718	78.8455281118542
24970588	1e-200	0.0159014	31684	12	-0.680746	eqtl-a-ENSG00000060982	rs2200509	G	T	0.854974	BCAT1	TRUE	reported	igd	0.0546811672812482	1832.61845828467
18389135	3.26671e-09	0.0124646	27399	19	-0.0737618	eqtl-a-ENSG00000060982	rs12608504	G	A	0.65022	BCAT1	TRUE	reported	igd	0.00127648842693988	35.0166517836239
42838550	5.74765e-10	0.0118964	31684	20	0.0737254	eqtl-a-ENSG00000060982	rs2143606	G	A	0.480514	BCAT1	TRUE	reported	igd	0.00121070137127909	38.4039365434999
148200011	3.59203e-10	0.0120505	31569	5	0.0755651	eqtl-a-ENSG00000061273	rs56330463	C	T	0.582097	HDAC7	TRUE	reported	igd	0.00124403028131121	39.3192181882145
28724374	2.48863e-09	0.0131108	31355	7	0.0781707	eqtl-a-ENSG00000061273	rs56388170	T	G	0.289189	HDAC7	TRUE	reported	igd	0.00113248042316933	35.5469148928483
48195052	1.72385e-20	0.0274428	31240	12	-0.254617	eqtl-a-ENSG00000061273	rs11837686	C	T	0.0491687	HDAC7	TRUE	reported	igd	0.00274796917464635	86.0775996681183
47998304	6.29361e-11	0.0119869	31684	12	-0.0783522	eqtl-a-ENSG00000061273	rs624959	G	A	0.435116	HDAC7	TRUE	reported	igd	0.00134667678308976	42.7229478438163
48178513	6.30376e-17	0.0129622	31683	12	0.108359	eqtl-a-ENSG00000061273	rs7972177	G	A	0.299478	HDAC7	TRUE	reported	igd	0.00220084458443917	69.8787495471254
183957860	3.67705e-23	0.0149813	31470	2	-0.148502	eqtl-a-ENSG00000061676	rs10460378	C	A	0.805385	NCKAP1	TRUE	reported	igd	0.00311254037455457	98.2512314311625
183756014	6.64982e-10	0.0119467	31462	2	-0.0737611	eqtl-a-ENSG00000061676	rs7595276	C	T	0.549716	NCKAP1	TRUE	reported	igd	0.00121017071151286	38.1180999923838
183909522	1.79061e-146	0.0130221	31351	2	-0.335618	eqtl-a-ENSG00000061676	rs62190103	T	C	0.724707	NCKAP1	TRUE	reported	igd	0.0207477786139458	664.202845358844
56849749	2.89068e-52	0.0121511	31470	3	0.184855	eqtl-a-ENSG00000061676	rs1354034	C	T	0.618137	NCKAP1	TRUE	reported	igd	0.00730049447412436	231.421451136965
270715	4.27612e-10	0.0140187	31355	11	0.0875299	eqtl-a-ENSG00000061676	rs17655730	C	T	0.234959	NCKAP1	TRUE	reported	igd	0.00124179793830099	38.9824991466211
56849749	1.79061e-188	0.0118944	31684	3	0.348285	eqtl-a-ENSG00000061918	rs1354034	C	T	0.618137	GUCY1B1	TRUE	reported	igd	0.0263480332707289	857.347818941284
99192919	5.60402e-13	0.0139722	26161	9	0.100738	eqtl-a-ENSG00000061918	rs10820606	C	A	0.236914	GUCY1B1	TRUE	reported	igd	0.00198308177924043	51.9785139069915
65050659	2.19351e-08	0.0120406	31569	10	0.0673791	eqtl-a-ENSG00000061918	rs7075195	G	A	0.421253	GUCY1B1	TRUE	reported	igd	0.000990975094855586	31.3131413625383
243268	1.76035e-34	0.014245	31569	11	0.174448	eqtl-a-ENSG00000061918	rs505404	G	T	0.222031	GUCY1B1	TRUE	reported	igd	0.00472811458927608	149.961428055496
69212885	3.10742e-11	0.0177925	31684	14	-0.118165	eqtl-a-ENSG00000061918	rs12589699	G	A	0.127908	GUCY1B1	TRUE	reported	igd	0.00139014343587845	44.1038349922125
195760234	6.98232e-12	0.029391	21502	3	0.20157	eqtl-a-ENSG00000061938	rs35356378	G	A	0.0426937	TNK2	TRUE	reported	igd	0.00218270596526891	47.0308327324382
195596907	3.41193e-34	0.011843	26606	3	0.144397	eqtl-a-ENSG00000061938	rs2278034	C	T	0.508438	TNK2	TRUE	reported	igd	0.00555639936316061	148.648398524421
195630374	4.92765e-09	0.0335125	23430	3	0.196038	eqtl-a-ENSG00000061938	rs113021491	A	G	0.0325224	TNK2	TRUE	reported	igd	0.0014583466539824	34.2160442631634
144385777	1.95389e-33	0.0265217	20660	6	0.319576	eqtl-a-ENSG00000061938	rs149110519	T	C	0.0526158	TNK2	TRUE	reported	igd	0.00697868905780721	145.178917076205
144385777	4.93606e-08	0.0266297	25735	6	0.145233	eqtl-a-ENSG00000062282	rs149110519	T	C	0.0526158	DGAT2	TRUE	reported	igd	0.00115444232022764	29.7415991871907
75943563	1.24529e-08	0.0250885	29382	11	-0.142839	eqtl-a-ENSG00000062282	rs55768233	A	G	0.0597153	DGAT2	TRUE	reported	igd	0.00110200609370521	32.4126579796657
75513888	9.9954e-85	0.0195277	31569	11	-0.380882	eqtl-a-ENSG00000062282	rs60677263	G	A	0.10057	DGAT2	TRUE	reported	igd	0.0119073617378367	380.409359834296
38163295	2.39889e-09	0.0122492	31569	17	0.0731071	eqtl-a-ENSG00000062282	rs12600856	C	T	0.379553	DGAT2	TRUE	reported	igd	0.00112707567863248	35.6185427406229
85806068	2.46962e-08	0.0120513	25361	2	-0.0671897	eqtl-a-ENSG00000062716	rs3731827	C	T	0.418566	VMP1	TRUE	reported	igd	0.00122416303551536	31.0815993626584
144385777	4.71628e-16	0.0265957	19527	6	-0.21592	eqtl-a-ENSG00000062716	rs149110519	T	C	0.0526158	VMP1	TRUE	reported	igd	0.00336406136777838	65.9050066928314
50370254	5.58264e-09	0.0166616	23869	7	0.0971203	eqtl-a-ENSG00000062716	rs149007767	T	C	0.149708	VMP1	TRUE	reported	igd	0.00142145994593729	33.9742776044923
61650831	4.18986e-11	0.0155238	25361	8	0.102413	eqtl-a-ENSG00000062716	rs7846314	T	A	0.178349	VMP1	TRUE	reported	igd	0.00171318026044081	43.5190942777875
40974023	2.54273e-32	0.029127	23069	13	-0.344747	eqtl-a-ENSG00000062716	rs77526211	A	G	0.0432109	VMP1	TRUE	reported	igd	0.00603602948880098	140.078610843977
57842765	5.73984e-31	0.0164531	25476	17	-0.190391	eqtl-a-ENSG00000062716	rs2136695	T	C	0.84695	VMP1	TRUE	reported	igd	0.00522864775177574	133.894660846143
56849749	5.57609e-09	0.0122356	31684	3	-0.0713239	eqtl-a-ENSG00000063169	rs1354034	C	T	0.618137	BICRA	TRUE	reported	igd	0.00107130740380029	33.9775615804851
48105080	2.56448e-79	0.0174587	31684	19	-0.329227	eqtl-a-ENSG00000063169	rs2974225	C	T	0.869649	BICRA	TRUE	reported	igd	0.0110989000345776	355.581919069343
47944037	2.26517e-14	0.0324142	25543	19	-0.247466	eqtl-a-ENSG00000063169	rs148457515	A	G	0.034786	BICRA	TRUE	reported	igd	0.00227666268533268	58.2809276593507
43994648	5.94142e-09	0.0149948	25797	17	0.087249	eqtl-a-ENSG00000063245	rs17649553	T	C	0.195317	EPN1	TRUE	reported	igd	0.00131069232843628	33.8536803711656
56165939	6.23591e-98	0.0442654	25244	19	0.929684	eqtl-a-ENSG00000063245	rs117482400	A	G	0.0178492	EPN1	TRUE	reported	igd	0.0171735699316826	441.069998682677
56162776	2.58048e-14	0.0210168	31683	19	-0.160104	eqtl-a-ENSG00000063245	rs2287791	T	C	0.91247	EPN1	TRUE	reported	igd	0.00182831125308186	58.0288235600044
77909769	1e-200	0.03913	26580	14	1.2489	eqtl-a-ENSG00000063761	rs139791189	T	C	0.0220646	ADCK1	TRUE	reported	igd	0.036910285425935	1018.59832080582
78296468	1.39894e-39	0.016244	26609	14	-0.213847	eqtl-a-ENSG00000063761	rs10149767	C	T	0.15739	ADCK1	TRUE	reported	igd	0.00647101417152731	173.295672816487
78118334	3.18127e-21	0.0151413	31564	14	0.143186	eqtl-a-ENSG00000063761	rs12881619	C	T	0.810582	ADCK1	TRUE	reported	igd	0.00282523144592281	89.4225944219526
78161131	1e-200	0.0384507	26721	14	1.78783	eqtl-a-ENSG00000063761	rs17825440	T	C	0.0212279	ADCK1	TRUE	reported	igd	0.0748518466360693	2161.77969225476
203281175	1.32041e-08	0.0119208	30362	1	-0.0677506	eqtl-a-ENSG00000063854	rs17534202	C	G	0.535966	HAGH	TRUE	reported	igd	0.00106273094914923	32.2988365894356
60718043	6.82402e-09	0.0163394	31086	2	0.0946901	eqtl-a-ENSG00000063854	rs1427407	G	T	0.842974	HAGH	TRUE	reported	igd	0.00107920302315439	33.5821887713771
154027216	3.77868e-09	0.0201891	31470	5	0.118988	eqtl-a-ENSG00000063854	rs74417235	G	A	0.0958886	HAGH	TRUE	reported	igd	0.00110254563613511	34.7332010171101
139838419	1.17517e-16	0.0118754	31470	6	-0.098396	eqtl-a-ENSG00000063854	rs628751	A	C	0.505619	HAGH	TRUE	reported	igd	0.00217678359293189	68.6484589414847
50427982	2.02582e-53	0.0118655	31470	7	0.182567	eqtl-a-ENSG00000063854	rs6592965	A	G	0.449532	HAGH	TRUE	reported	igd	0.00746656539972594	236.725405722177
1872722	1e-200	0.0164387	28703	16	-0.504094	eqtl-a-ENSG00000063854	rs238678	G	A	0.856514	HAGH	TRUE	reported	igd	0.0317220233079745	940.281420086206
1990176	3.32047e-32	0.0168187	19095	16	-0.198687	eqtl-a-ENSG00000063854	rs2815304	A	G	0.14504	HAGH	TRUE	reported	igd	0.00725557525076966	139.543164191467
43831259	4.617e-10	0.0135649	31355	18	0.0845295	eqtl-a-ENSG00000063854	rs9944715	G	A	0.740866	HAGH	TRUE	reported	igd	0.00123691280393557	38.8289551736096
4157072	2.97989e-28	0.0123001	31355	20	-0.135575	eqtl-a-ENSG00000063854	rs6084653	G	C	0.36636	HAGH	TRUE	reported	igd	0.00385971856464692	121.482644977477
201643601	2.4498e-08	0.0457655	2912	2	0.255225	eqtl-a-ENSG00000064012	rs35627330	A	G	0.0171703	CASP8	TRUE	reported	igd	0.0105673205530077	31.0793280311293
202164837	7.34514e-152	0.0118923	31350	2	0.312158	eqtl-a-ENSG00000064012	rs7560328	C	A	0.605761	CASP8	TRUE	reported	igd	0.0215049440418509	688.952878932865
201994540	4.95793e-19	0.017017	31355	2	-0.151674	eqtl-a-ENSG00000064012	rs10931931	T	C	0.14173	CASP8	TRUE	reported	igd	0.00252726342315704	79.4380509869087
127009395	2.65308e-10	0.0158282	31355	9	-0.0999981	eqtl-a-ENSG00000064012	rs55793580	T	C	0.169838	CASP8	TRUE	reported	igd	0.001271338346681	39.9110115829695
41363729	2.42829e-47	0.0120957	30549	4	0.17481	eqtl-a-ENSG00000064042	rs6447061	G	A	0.393167	LIMCH1	TRUE	reported	igd	0.00679069637103931	208.853663863413
41373402	6.62217e-22	0.0142716	30551	4	-0.137283	eqtl-a-ENSG00000064042	rs1869286	A	G	0.222124	LIMCH1	TRUE	reported	igd	0.00301959976348878	92.525142071936
41642833	2.85891e-17	0.012005	30551	4	0.10147	eqtl-a-ENSG00000064042	rs4861123	G	A	0.42619	LIMCH1	TRUE	reported	igd	0.00233298086803707	71.4368934433398
2345621	3.75232e-73	0.0158329	30720	11	-0.286434	eqtl-a-ENSG00000064201	rs11022291	C	T	0.834505	TSPAN32	TRUE	reported	igd	0.0105415518145272	327.265272465438
2306683	1e-200	0.0114432	25437	11	0.407269	eqtl-a-ENSG00000064201	rs10765907	C	T	0.54197	TSPAN32	TRUE	reported	igd	0.0474347458199971	1266.58279276649
2427645	6.53281e-15	0.0295294	21977	11	0.230134	eqtl-a-ENSG00000064201	rs72845802	T	C	0.0422334	TSPAN32	TRUE	reported	igd	0.00275603883968799	60.7313314102964
2271304	2.70085e-15	0.019445	30276	11	-0.153691	eqtl-a-ENSG00000064201	rs77926599	T	C	0.104113	TSPAN32	TRUE	reported	igd	0.00205914667615987	62.4672356747724
98489915	1e-200	0.0115808	31558	3	0.359434	eqtl-a-ENSG00000064225	rs1440152	G	C	0.44757	ST3GAL6	TRUE	reported	igd	0.029620562560145	963.238127359712
98585142	3.86723e-96	0.0123874	27820	3	-0.257726	eqtl-a-ENSG00000064225	rs13071075	G	A	0.33869	ST3GAL6	TRUE	reported	igd	0.0153212286211278	432.837540699396
98818848	3.21218e-13	0.0127324	26892	3	-0.092759	eqtl-a-ENSG00000064225	rs1851817	C	A	0.679745	ST3GAL6	TRUE	reported	igd	0.00196975480405023	53.0712440187737
148200011	5.97998e-34	0.0120047	31569	5	0.145815	eqtl-a-ENSG00000064225	rs56330463	C	T	0.582097	ST3GAL6	TRUE	reported	igd	0.00465174624018465	147.527936085919
128563014	1e-200	0.0156718	31141	7	-0.505162	eqtl-a-ENSG00000064419	rs2402941	G	A	0.840088	TNPO3	TRUE	reported	igd	0.0322877132362306	1038.95250294411
128725297	1e-200	0.0122826	31355	7	-0.377495	eqtl-a-ENSG00000064419	rs13244090	G	A	0.327017	TNPO3	TRUE	reported	igd	0.0292445421093438	944.526369953756
128823846	6.38117e-22	0.0200827	29616	7	0.19326	eqtl-a-ENSG00000064419	rs6946734	C	T	0.0965865	TNPO3	TRUE	reported	igd	0.00311714835985144	92.5998790898681
19545642	5.95662e-45	0.0242888	28473	19	-0.341694	eqtl-a-ENSG00000064490	rs113564583	G	A	0.0632105	RFXANK	TRUE	reported	igd	0.0069027341303691	197.893751377559
19286077	1e-200	0.0314839	31355	19	1.03439	eqtl-a-ENSG00000064490	rs11671119	T	C	0.0343798	RFXANK	TRUE	reported	igd	0.0332801599325559	1079.35392563437
19303284	1.15027e-12	0.0309931	27284	19	-0.220395	eqtl-a-ENSG00000064490	rs79003009	T	C	0.0382052	RFXANK	TRUE	reported	igd	0.00184995527941541	50.5640211108137
21410231	1.59001e-13	0.0120219	31684	1	-0.0887122	eqtl-a-ENSG00000064547	rs4654899	A	C	0.42356	LPAR2	TRUE	reported	igd	0.00171567382168374	54.4493954209143
85794297	4.54046e-13	0.0120333	31684	2	-0.087102	eqtl-a-ENSG00000064547	rs10187424	C	T	0.420816	LPAR2	TRUE	reported	igd	0.00165093197268032	52.3913212658266
178121599	2.27562e-09	0.0130549	31684	5	0.0780263	eqtl-a-ENSG00000064547	rs6866344	G	T	0.293416	LPAR2	TRUE	reported	igd	0.00112617415405314	35.7196761247544
50370254	3.65932e-13	0.0166505	30077	7	0.121012	eqtl-a-ENSG00000064547	rs149007767	T	C	0.149708	LPAR2	TRUE	reported	igd	0.00175309630488187	52.8169645947886
19350103	1e-200	0.0169487	31141	19	-0.598327	eqtl-a-ENSG00000064547	rs72999016	A	G	0.130285	LPAR2	TRUE	reported	igd	0.0384795843882794	1246.16779718018
19391045	4.6957e-28	0.031858	28588	19	0.349845	eqtl-a-ENSG00000064547	rs17751021	A	G	0.035895	LPAR2	TRUE	reported	igd	0.00420051414097254	120.582405332593
19793545	1.17733e-36	0.0221722	31684	19	0.280391	eqtl-a-ENSG00000064547	rs56408111	C	T	0.0772107	LPAR2	TRUE	reported	igd	0.00502208432894388	159.912771131498
19406707	1.30407e-26	0.0389691	25749	19	0.416073	eqtl-a-ENSG00000064547	rs74182633	C	A	0.0237013	LPAR2	TRUE	reported	igd	0.00440777529052794	113.989430199035
19499589	2.42159e-31	0.0392884	24433	19	0.457529	eqtl-a-ENSG00000064547	rs117131852	T	C	0.023272	LPAR2	TRUE	reported	igd	0.0055198577801507	135.604161110589
19689231	1.68422e-78	0.0332074	25559	19	0.622885	eqtl-a-ENSG00000064547	rs10415813	G	A	0.967609	LPAR2	TRUE	reported	igd	0.0135788970247814	351.813105189678
154420087	1.42959e-08	0.012309	31484	1	0.0697908	eqtl-a-ENSG00000064601	rs61812598	A	G	0.370648	CTSA	TRUE	reported	igd	0.00102004112548807	32.1457246737912
118153977	6.83597e-11	0.0128667	31569	1	0.083945	eqtl-a-ENSG00000064601	rs826415	G	T	0.308498	CTSA	TRUE	reported	igd	0.0013465091721259	42.5625659219014
43360065	1.38771e-11	0.0136451	26953	2	0.0922315	eqtl-a-ENSG00000064601	rs28498283	T	A	0.254318	CTSA	TRUE	reported	igd	0.00169224185661085	45.6849202117172
56849749	1.03801e-87	0.0120828	31684	3	0.239878	eqtl-a-ENSG00000064601	rs1354034	C	T	0.618137	CTSA	TRUE	reported	igd	0.0122867365334843	394.11072145337
135419018	2.26449e-09	0.0134787	31569	6	0.0805716	eqtl-a-ENSG00000064601	rs9399137	C	T	0.264393	CTSA	TRUE	reported	igd	0.00113061784972029	35.7306113290703
243268	2.50207e-13	0.0142933	31569	11	0.104612	eqtl-a-ENSG00000064601	rs505404	G	T	0.222031	CTSA	TRUE	reported	igd	0.00169395110083571	53.5636886694674
122216910	1.47843e-14	0.0190102	30031	12	0.146181	eqtl-a-ENSG00000064601	rs11553699	G	A	0.10963	CTSA	TRUE	reported	igd	0.00196509893297859	59.1261445820434
54685880	2.88602e-33	0.0255189	29836	12	-0.306663	eqtl-a-ENSG00000064601	rs35979828	T	C	0.0571059	CTSA	TRUE	reported	igd	0.00481682961463104	144.400849008786
33884804	3.26498e-08	0.0155075	31684	17	0.0857053	eqtl-a-ENSG00000064601	rs10512472	C	T	0.179037	CTSA	TRUE	reported	igd	0.000963104256341226	30.5424846463649
44603963	4.49573e-46	0.0160228	31566	20	0.228323	eqtl-a-ENSG00000064601	rs6017717	C	G	0.162395	CTSA	TRUE	reported	igd	0.00639172597731076	203.04625476904
19841752	5.71808e-09	0.0261391	23513	19	-0.152252	eqtl-a-ENSG00000064607	rs12608822	T	C	0.0547144	SUGP2	TRUE	reported	igd	0.00144082261238508	33.9240589910838
19375822	2.85338e-08	0.0312781	22963	19	-0.173597	eqtl-a-ENSG00000064607	rs78538967	C	T	0.0375386	SUGP2	TRUE	reported	igd	0.00133965473436727	30.8010751619712
19098258	1e-200	0.0130018	26490	19	-0.578094	eqtl-a-ENSG00000064607	rs2107263	A	G	0.757286	SUGP2	TRUE	reported	igd	0.0694463492819364	1976.77468500659
54685880	4.13752e-09	0.0256178	29836	12	0.150602	eqtl-a-ENSG00000064666	rs35979828	T	C	0.0571059	CNN2	TRUE	reported	igd	0.00115700290082799	34.558008259105
1135485	2.12227e-12	0.0239234	23284	19	0.168095	eqtl-a-ENSG00000064666	rs11880562	G	A	0.0660388	CNN2	TRUE	reported	igd	0.00211585702803026	49.3658343742058
1005834	1e-200	0.0186127	20249	19	-0.574884	eqtl-a-ENSG00000064666	rs116977028	A	T	0.107289	CNN2	TRUE	reported	igd	0.044992971441947	953.891087231641
1086352	3.89583e-36	0.0119077	19278	19	-0.149462	eqtl-a-ENSG00000064666	rs12471	A	C	0.554179	CNN2	TRUE	reported	igd	0.00810604623702479	157.529085314122
1055718	3.62243e-184	0.0220318	20500	19	-0.637627	eqtl-a-ENSG00000064687	rs113337161	T	C	0.0744293	ABCA7	TRUE	reported	igd	0.0392543683950681	837.51204990436
1021639	1.09926e-60	0.0420869	17396	19	-0.691631	eqtl-a-ENSG00000064687	rs150244663	T	C	0.0200239	ABCA7	TRUE	reported	igd	0.0152867584938675	270.025694826279
1258940	2.13845e-14	0.0418177	10464	19	-0.319567	eqtl-a-ENSG00000064687	rs117875320	T	G	0.0205975	ABCA7	TRUE	reported	igd	0.00554994667532678	58.3875901289855
83756393	1.65234e-45	0.0127721	31684	15	0.180837	eqtl-a-ENSG00000064726	rs13379920	G	A	0.310553	BTBD1	TRUE	reported	igd	0.00628739522605596	200.457611783258
84205754	2.64789e-13	0.0182661	31684	15	0.133547	eqtl-a-ENSG00000064726	rs17158873	C	T	0.120222	BTBD1	TRUE	reported	igd	0.00168424215352768	53.4501829593177
84484897	1.05801e-09	0.0119029	31684	15	-0.0726137	eqtl-a-ENSG00000064726	rs4262914	A	G	0.525161	BTBD1	TRUE	reported	igd	0.00117322614865522	37.2138110579189
182323766	2.48382e-08	0.0119924	25531	2	0.0668494	eqtl-a-ENSG00000064763	rs1375493	A	G	0.565077	FAR2	TRUE	reported	igd	0.00121558895537203	31.0705394462808
173205318	4.33122e-10	0.0137197	25531	5	-0.085634	eqtl-a-ENSG00000064763	rs2594836	A	G	0.749651	FAR2	TRUE	reported	igd	0.00152360786683353	38.9555381968467
148869277	1.2523e-09	0.0123765	25147	7	0.0751677	eqtl-a-ENSG00000064763	rs4727027	A	G	0.639097	FAR2	TRUE	reported	igd	0.00146468447675514	36.8835138782336
127009395	1.39927e-36	0.0157618	25531	9	-0.199107	eqtl-a-ENSG00000064763	rs55793580	T	C	0.169838	FAR2	TRUE	reported	igd	0.00621137327578972	159.561242796997
111884608	3.52046e-14	0.0119216	22380	12	0.0903395	eqtl-a-ENSG00000064763	rs3184504	C	T	0.542056	FAR2	TRUE	reported	igd	0.002559253444396	57.417920589733
29300802	2.26032e-08	0.0123143	25531	12	-0.068848	eqtl-a-ENSG00000064763	rs3809188	A	G	0.630067	FAR2	TRUE	reported	igd	0.00122282407877845	31.2556961249555
111785930	3.96004e-71	0.0127273	30935	1	0.226957	eqtl-a-ENSG00000064886	rs1056825	C	T	0.690086	CHI3L2	TRUE	reported	igd	0.0101747329045902	317.970275563143
111823994	1e-200	0.025941	30491	1	0.90592	eqtl-a-ENSG00000064886	rs76275224	T	C	0.0510606	CHI3L2	TRUE	reported	igd	0.0384593763282931	1219.48869970332
112112140	1.1729e-10	0.0465619	23613	1	-0.299989	eqtl-a-ENSG00000064886	rs145439981	C	T	0.0165656	CHI3L2	TRUE	reported	igd	0.00175483110160231	41.5061534288769
111572204	1.27968e-21	0.0127874	30818	1	-0.122135	eqtl-a-ENSG00000064886	rs1282332	G	A	0.313566	CHI3L2	TRUE	reported	igd	0.00295139713251783	91.2194789442552
111741188	1e-200	0.0170641	29328	1	0.829542	eqtl-a-ENSG00000064886	rs41312686	T	C	0.118171	CHI3L2	TRUE	reported	igd	0.0745711070798998	2363.09056585069
111842693	6.45967e-09	0.0160273	24390	1	-0.0930258	eqtl-a-ENSG00000064886	rs12404497	A	G	0.164698	CHI3L2	TRUE	reported	igd	0.00137935113425972	33.6860803955283
35404437	4.87528e-101	0.0132329	25742	6	-0.282385	eqtl-a-ENSG00000065060	rs9462085	A	G	0.732441	BLTP3A	TRUE	reported	igd	0.0173826241505889	455.343816049849
34156790	2.82553e-21	0.0441205	23644	6	0.417782	eqtl-a-ENSG00000065060	rs62398145	C	T	0.0184218	BLTP3A	TRUE	reported	igd	0.00377792912949957	89.6565164447549
34695221	1e-200	0.0228607	25750	6	0.839704	eqtl-a-ENSG00000065060	rs57916801	A	G	0.0662577	BLTP3A	TRUE	reported	igd	0.0497871276165232	1349.08608284239
34468767	1e-200	0.0176206	26081	6	0.586265	eqtl-a-ENSG00000065060	rs73405691	G	A	0.120254	BLTP3A	TRUE	reported	igd	0.0407163962744475	1106.91238161213
34115617	2.54331e-30	0.0333246	22993	6	0.381344	eqtl-a-ENSG00000065060	rs78691829	A	G	0.0326719	BLTP3A	TRUE	reported	igd	0.00566293963303969	130.938139885047
34966411	9.8107e-67	0.0409873	22559	6	0.70735	eqtl-a-ENSG00000065060	rs111314618	A	G	0.0210951	BLTP3A	TRUE	reported	igd	0.0130302898066055	297.804729093465
110060710	2.07014e-111	0.0238268	31684	1	0.534405	eqtl-a-ENSG00000065135	rs56018934	T	C	0.0643955	GNAI3	TRUE	reported	igd	0.0156289008740799	503.016431437571
109648870	5.23805e-10	0.0154077	30744	1	0.0957114	eqtl-a-ENSG00000065135	rs533212	G	C	0.181893	GNAI3	TRUE	reported	igd	0.00125356420073975	38.5854399853768
109894693	1e-200	0.0149049	31684	1	-0.454845	eqtl-a-ENSG00000065135	rs7536292	C	T	0.183115	GNAI3	TRUE	reported	igd	0.0285527495235366	931.196428793231
110155000	9.25124e-95	0.0360265	30044	1	0.744047	eqtl-a-ENSG00000065135	rs116468196	A	C	0.0272338	GNAI3	TRUE	reported	igd	0.01399833843246	426.508493423221
126149715	1.32779e-09	0.0131048	26440	10	-0.0794675	eqtl-a-ENSG00000065154	rs2176139	A	G	0.710404	OAT	TRUE	reported	igd	0.00138884336854191	36.7693077867967
125755374	5.15157e-09	0.0207028	31196	10	-0.120948	eqtl-a-ENSG00000065154	rs7070561	T	C	0.0906693	OAT	TRUE	reported	igd	0.00109286222311283	34.1280414350148
126084645	1.03039e-172	0.0165711	31527	10	-0.464256	eqtl-a-ENSG00000065154	rs9422943	A	G	0.142515	OAT	TRUE	reported	igd	0.0242912534643525	784.846674976215
126090562	2.44625e-41	0.0118487	31528	10	0.159568	eqtl-a-ENSG00000065154	rs2491159	C	T	0.470275	OAT	TRUE	reported	igd	0.0057195606534524	181.352123631483
976709	1e-200	0.0112058	19007	19	-0.49275	eqtl-a-ENSG00000065268	rs11085231	T	A	0.543461	WDR18	TRUE	reported	igd	0.0923375459726448	1933.40052067112
1100217	4.79623e-26	0.026658	20129	19	0.281388	eqtl-a-ENSG00000065268	rs116649696	C	A	0.0521788	WDR18	TRUE	reported	igd	0.00550473652828321	111.407098831202
1064054	9.63385e-11	0.0329136	17997	19	-0.213037	eqtl-a-ENSG00000065268	rs75707890	G	A	0.0337409	WDR18	TRUE	reported	igd	0.00232246606953093	41.8900651762313
52340176	2.16571e-62	0.0217403	31683	6	-0.362408	eqtl-a-ENSG00000065308	rs9474227	C	T	0.079882	TRAM2	TRUE	reported	igd	0.00869452169301784	277.867062963207
52450963	1.1324e-159	0.0125644	30902	6	0.33829	eqtl-a-ENSG00000065308	rs9463800	G	C	0.691234	TRAM2	TRUE	reported	igd	0.0229212238940136	724.88097750697
52393749	2.77715e-23	0.0287394	2434	6	0.285681	eqtl-a-ENSG00000065308	rs143579024	T	C	0.0445768	TRAM2	TRUE	reported	igd	0.0390125607588777	98.7302683586735
75584457	1e-200	0.0215468	28471	16	0.677415	eqtl-a-ENSG00000065457	rs28571860	T	G	0.0772782	ADAT1	TRUE	reported	igd	0.0335521055892071	988.356329961776
75530411	1e-200	0.0115229	27751	16	0.608618	eqtl-a-ENSG00000065457	rs2738805	G	A	0.334958	ADAT1	TRUE	reported	igd	0.091345306244381	2789.55352390117
75262638	1.75509e-18	0.016338	31355	16	0.14332	eqtl-a-ENSG00000065457	rs77276355	A	G	0.156469	ADAT1	TRUE	reported	igd	0.00244818635454723	76.9463658169444
203281175	7.42574e-09	0.0119203	30362	1	-0.0689125	eqtl-a-ENSG00000065491	rs17534202	C	G	0.535966	TBC1D22B	TRUE	reported	igd	0.00109954618103799	33.4189677546823
56849749	3.6166e-13	0.0122275	31470	3	-0.0888852	eqtl-a-ENSG00000065491	rs1354034	C	T	0.618137	TBC1D22B	TRUE	reported	igd	0.00167632488629303	52.8391671327045
37302075	5.75838e-38	0.0166694	31470	6	-0.214719	eqtl-a-ENSG00000065491	rs195413	G	A	0.147864	TBC1D22B	TRUE	reported	igd	0.00524469859546137	165.910325050744
135426573	5.75506e-10	0.013327	31086	6	-0.0825875	eqtl-a-ENSG00000065491	rs4895441	G	A	0.273956	TBC1D22B	TRUE	reported	igd	0.00123385127972057	38.4004135782695
37295170	6.98232e-15	0.0144999	25524	6	-0.11288	eqtl-a-ENSG00000065491	rs9349036	T	C	0.786769	TBC1D22B	TRUE	reported	igd	0.00236878302180295	60.5996276515636
139835780	6.88177e-16	0.0319561	31026	6	-0.257975	eqtl-a-ENSG00000065491	rs668887	A	G	0.964189	TBC1D22B	TRUE	reported	igd	0.00209609341613316	65.1657957375177
118153977	2.11159e-08	0.0128718	31569	1	-0.072113	eqtl-a-ENSG00000065534	rs826415	G	T	0.308498	MYLK	TRUE	reported	igd	0.000993244479719862	31.3849213912352
56849749	6.7112e-26	0.0122026	31684	3	0.128417	eqtl-a-ENSG00000065534	rs1354034	C	T	0.618137	MYLK	TRUE	reported	igd	0.00348325193224365	110.742130457239
123417546	1.22744e-31	0.0205966	28801	3	-0.241047	eqtl-a-ENSG00000065534	rs56193997	C	T	0.0909761	MYLK	TRUE	reported	igd	0.00473308595690692	136.956368738548
135419018	7.16506e-10	0.0134776	31569	6	0.0830559	eqtl-a-ENSG00000065534	rs9399137	C	T	0.264393	MYLK	TRUE	reported	igd	0.00120152523621917	37.9741740601885
100707992	8.87973e-18	0.0123914	31567	9	0.106413	eqtl-a-ENSG00000065534	rs10984466	G	A	0.356829	MYLK	TRUE	reported	igd	0.0023307832216395	73.743051458102
65066186	1.74864e-11	0.0120364	31684	10	-0.0809506	eqtl-a-ENSG00000065534	rs10761741	T	G	0.420816	MYLK	TRUE	reported	igd	0.001425566096702	45.2292623787389
202856	1.24919e-09	0.0145488	26110	11	0.0883667	eqtl-a-ENSG00000065534	rs11602954	A	G	0.211758	MYLK	TRUE	reported	igd	0.00141092154816816	36.8883863988215
54687232	2.55971e-09	0.0125544	31185	12	0.0747926	eqtl-a-ENSG00000065534	rs10506328	C	A	0.660666	MYLK	TRUE	reported	igd	0.00113680402118	35.4893041761522
122216910	1.08069e-30	0.0189611	30031	12	0.218382	eqtl-a-ENSG00000065534	rs11553699	G	A	0.10963	MYLK	TRUE	reported	igd	0.00439767094949029	132.640972292808
1600925	1.73061e-14	0.0123335	31684	20	-0.0945871	eqtl-a-ENSG00000065534	rs11696739	A	G	0.365478	MYLK	TRUE	reported	igd	0.00185287320474657	58.8116994949006
1924707	4.80176e-15	0.0131666	31569	20	-0.103119	eqtl-a-ENSG00000065534	rs13042885	T	C	0.284247	MYLK	TRUE	reported	igd	0.00193921636695006	61.3341833076363
173207353	4.36014e-12	0.0146907	31529	5	-0.101735	eqtl-a-ENSG00000065613	rs360017	G	A	0.793972	SLK	TRUE	reported	igd	0.00151874729433865	47.9543765282187
50370254	5.38394e-15	0.0166456	30037	7	0.130132	eqtl-a-ENSG00000065613	rs149007767	T	C	0.149708	SLK	TRUE	reported	igd	0.00203062608080803	61.1139539258123
28724374	1.07669e-09	0.0131101	31315	7	0.0799413	eqtl-a-ENSG00000065613	rs56388170	T	G	0.289189	SLK	TRUE	reported	igd	0.00118593977592743	37.1794247622874
105723183	2.28034e-133	0.0117083	28749	10	-0.287742	eqtl-a-ENSG00000065613	rs10883952	T	C	0.546871	SLK	TRUE	reported	igd	0.0205762728541436	603.932801854593
105998341	2.89935e-22	0.012217	31526	10	0.118554	eqtl-a-ENSG00000065613	rs590610	C	T	0.380676	SLK	TRUE	reported	igd	0.00297809880715855	94.162010568219
105623955	2.88942e-10	0.0120724	31230	10	0.0761129	eqtl-a-ENSG00000065613	rs10883931	T	C	0.412655	SLK	TRUE	reported	igd	0.00127117372180844	39.7467379934988
159506600	7.62255e-09	0.0127978	31684	6	-0.0739292	eqtl-a-ENSG00000065618	rs2451258	T	C	0.685013	COL17A1	TRUE	reported	igd	0.00105211739653905	33.3682907163055
61650831	4.33581e-08	0.0155312	31569	8	-0.0850565	eqtl-a-ENSG00000065618	rs7846314	T	A	0.178349	COL17A1	TRUE	reported	igd	0.000949143248249619	29.9900697897512
131466489	7.45418e-17	0.0183024	28587	9	0.152636	eqtl-a-ENSG00000065618	rs13289095	T	G	0.119513	COL17A1	TRUE	reported	igd	0.00242702338928141	69.5452515346973
105736284	3.95913e-77	0.0150872	31569	10	-0.280453	eqtl-a-ENSG00000065618	rs10883958	A	G	0.813203	COL17A1	TRUE	reported	igd	0.0108271523187459	345.521733685906
11883126	1.12769e-09	0.0322458	28216	10	-0.196383	eqtl-a-ENSG00000065665	rs11257354	A	G	0.0352189	SEC61A2	TRUE	reported	igd	0.00131279075386014	37.0877668067553
12163741	1e-200	0.0117018	30902	10	0.370922	eqtl-a-ENSG00000065665	rs12766360	T	A	0.59219	SEC61A2	TRUE	reported	igd	0.0314903303234773	1004.68920183362
12089892	5.32844e-14	0.050354	19316	10	0.378849	eqtl-a-ENSG00000065665	rs150536510	C	A	0.0141142	SEC61A2	TRUE	reported	igd	0.00292197360151366	56.6003829644926
12239456	7.52489e-72	0.0139134	31482	10	-0.249397	eqtl-a-ENSG00000065665	rs7897943	G	A	0.233385	SEC61A2	TRUE	reported	igd	0.0101028445316126	321.283422321462
6614332	4.2924e-14	0.0121313	31231	10	0.091613	eqtl-a-ENSG00000065675	rs2007252	C	T	0.601334	PRKCQ	TRUE	reported	igd	0.00182272567946973	57.0258427120649
6625378	7.2845e-73	0.0128848	30902	10	-0.232627	eqtl-a-ENSG00000065675	rs2255088	C	T	0.296415	PRKCQ	TRUE	reported	igd	0.0104380952636423	325.93932941717
6508563	7.8361e-13	0.0118821	31684	10	-0.0851247	eqtl-a-ENSG00000065675	rs658230	G	A	0.49705	PRKCQ	TRUE	reported	igd	0.001617267424882	51.3212667680592
239486566	9.36268e-14	0.0298104	29619	2	0.222082	eqtl-a-ENSG00000065802	rs79676909	T	C	0.041421	ASB1	TRUE	reported	igd	0.0018702846361933	55.4960134113904
239203162	3.53167e-08	0.019465	31019	2	-0.107303	eqtl-a-ENSG00000065802	rs4663301	T	A	0.104136	ASB1	TRUE	reported	igd	0.000978727644780172	30.3869358923446
239318389	1e-200	0.0111586	31468	2	0.510276	eqtl-a-ENSG00000065802	rs502349	T	C	0.547112	ASB1	TRUE	reported	igd	0.0623131289500919	2091.04443719916
14700275	2.25372e-61	0.0177657	30431	10	-0.293652	eqtl-a-ENSG00000065809	rs78155027	A	C	0.125972	FAM107B	TRUE	reported	igd	0.00889822347042867	273.194992072134
14512746	1.50141e-41	0.0173467	30935	10	0.234233	eqtl-a-ENSG00000065809	rs7898971	G	A	0.13424	FAM107B	TRUE	reported	igd	0.00585949348060466	182.320014773493
14719488	1e-200	0.0143283	30805	10	0.484419	eqtl-a-ENSG00000065809	rs11259263	C	T	0.199366	FAM107B	TRUE	reported	igd	0.0357774256136397	1142.94362157856
14553644	1e-200	0.0121668	30935	10	-0.369613	eqtl-a-ENSG00000065809	rs7092826	T	G	0.340655	FAM107B	TRUE	reported	igd	0.0289684305468776	922.812903612631
54685880	9.47567e-10	0.0256152	29087	12	0.156716	eqtl-a-ENSG00000065809	rs35979828	T	C	0.0571059	FAM107B	TRUE	reported	igd	0.0012852089024568	37.4284042462981
37894646	2.59753e-09	0.0147826	27305	4	0.0880319	eqtl-a-ENSG00000065882	rs6531595	C	A	0.797161	TBC1D1	TRUE	reported	igd	0.00129709752544367	35.4606496581107
37841430	1.68655e-31	0.0148197	31300	4	0.173039	eqtl-a-ENSG00000065882	rs2261414	T	C	0.199581	TBC1D1	TRUE	reported	igd	0.00433687847604438	136.326855548773
38026106	5.12507e-17	0.0118934	31299	4	-0.0997108	eqtl-a-ENSG00000065882	rs933819	T	C	0.471418	TBC1D1	TRUE	reported	igd	0.00224061742448274	70.2820787843896
37983981	7.16143e-113	0.0177835	30601	4	0.401515	eqtl-a-ENSG00000065882	rs73236866	T	A	0.123311	TBC1D1	TRUE	reported	igd	0.0163854508498997	509.73057585342
135860412	1.27204e-11	0.0326865	6419	9	0.221346	eqtl-a-ENSG00000065978	rs73660574	A	G	0.0342189	YBX1	TRUE	reported	igd	0.00709328790717697	45.842804712654
27206029	3.90571e-13	0.0161856	6421	17	0.117489	eqtl-a-ENSG00000065978	rs7213285	A	G	0.160464	YBX1	TRUE	reported	igd	0.00813925845026348	52.6746324394385
4157072	5.09918e-12	0.0123321	6421	20	-0.0851249	eqtl-a-ENSG00000065978	rs6084653	G	C	0.36636	YBX1	TRUE	reported	igd	0.00736589757581985	47.6325530462007
10627322	1.85481e-12	0.0138699	30745	19	-0.0977132	eqtl-a-ENSG00000065989	rs10416139	T	C	0.242111	PDE4A	TRUE	reported	igd	0.00161170219427068	49.6285469965563
10447203	2.10863e-23	0.0529871	3428	19	0.52817	eqtl-a-ENSG00000065989	rs147394556	T	C	0.0126896	PDE4A	TRUE	reported	igd	0.0281680962548615	99.3010184140482
10532458	5.72532e-62	0.0208894	31568	19	-0.34701	eqtl-a-ENSG00000065989	rs77376335	C	T	0.0872306	PDE4A	TRUE	reported	igd	0.00866572894976779	275.933565515268
212097748	8.97222e-45	0.0122414	31355	1	-0.171859	eqtl-a-ENSG00000066027	rs2970579	A	G	0.370129	PPP2R5A	TRUE	reported	igd	0.00624675019880386	197.085502887441
212889072	1.76116e-12	0.0282359	29143	1	0.199128	eqtl-a-ENSG00000066027	rs61829198	G	A	0.0464309	PPP2R5A	TRUE	reported	igd	0.00170367444725487	49.7315033589505
212357282	6.47143e-127	0.0426328	28645	1	1.02169	eqtl-a-ENSG00000066027	rs146891838	T	C	0.0190921	PPP2R5A	TRUE	reported	igd	0.019655338757129	574.275446460528
212602590	3.45868e-09	0.0441128	23155	1	0.260623	eqtl-a-ENSG00000066027	rs588058	A	G	0.981499	PPP2R5A	TRUE	reported	igd	0.00150521052683053	34.9026752018356
212442602	3.15573e-42	0.0467711	27725	1	-0.636901	eqtl-a-ENSG00000066027	rs142218926	C	T	0.0162472	PPP2R5A	TRUE	reported	igd	0.00664388502311553	185.420335888422
212346089	1e-200	0.0165249	29693	1	0.749767	eqtl-a-ENSG00000066027	rs10779571	A	G	0.130149	PPP2R5A	TRUE	reported	igd	0.0648349461084076	2058.47553530148
212585781	9.25763e-30	0.0430538	24986	1	-0.487821	eqtl-a-ENSG00000066027	rs183325637	T	C	0.0193109	PPP2R5A	TRUE	reported	igd	0.00511181987011622	128.369911499311
144385777	1.04544e-12	0.0266099	25735	6	0.189583	eqtl-a-ENSG00000066027	rs149110519	T	C	0.0526158	PPP2R5A	TRUE	reported	igd	0.00196848622442164	50.755
50370254	5.10235e-09	0.0166615	30077	7	-0.097363	eqtl-a-ENSG00000066027	rs149007767	T	C	0.149708	PPP2R5A	TRUE	reported	igd	0.00113405049425844	34.1452910990701
38128648	2.22039e-09	0.0119357	31684	17	-0.0713827	eqtl-a-ENSG00000066027	rs3859192	T	C	0.455547	PPP2R5A	TRUE	reported	igd	0.00112761321175613	35.7653712800364
188125120	6.68375e-10	0.0118955	31355	3	-0.0734359	eqtl-a-ENSG00000066084	rs13093110	T	C	0.481579	DIP2B	TRUE	reported	igd	0.00121399551963594	38.1087
144385777	2.06771e-09	0.0266239	25521	6	-0.159538	eqtl-a-ENSG00000066084	rs149110519	T	C	0.0526158	DIP2B	TRUE	reported	igd	0.00140500101873301	35.9046670908875
50370254	6.77532e-09	0.0166618	29863	7	0.0965817	eqtl-a-ENSG00000066084	rs149007767	T	C	0.149708	DIP2B	TRUE	reported	igd	0.00112389062468221	33.598258711607
50954191	1.25314e-179	0.0122407	26678	12	-0.349815	eqtl-a-ENSG00000066084	rs12582683	C	A	0.337168	DIP2B	TRUE	reported	igd	0.029704025497142	816.64214320558
50760443	1.90546e-121	0.0124551	27100	12	0.291875	eqtl-a-ENSG00000066084	rs9739363	T	C	0.673794	DIP2B	TRUE	reported	igd	0.0198617452577263	549.120055655199
974606	7.59539e-09	0.0484331	4603	5	-0.279808	eqtl-a-ENSG00000066230	rs114991474	A	G	0.0152994	SLC9A3	TRUE	reported	igd	0.00719874948607308	33.3616082456351
972566	3.19595e-32	0.0329592	4574	5	0.389476	eqtl-a-ENSG00000066230	rs140456511	G	A	0.0334053	SLC9A3	TRUE	reported	igd	0.0296245471402215	139.578375695644
365662	9.85372e-27	0.0341981	5081	5	-0.366019	eqtl-a-ENSG00000066230	rs74533118	G	A	0.0310066	SLC9A3	TRUE	reported	igd	0.0220481215652868	114.507075347438
435631	9.22465e-09	0.0410499	2022	5	-0.235799	eqtl-a-ENSG00000066230	rs11750039	A	G	0.0214319	SLC9A3	TRUE	reported	igd	0.0160564213203351	32.9632427812573
187612	1e-200	0.0191159	5262	5	0.621145	eqtl-a-ENSG00000066230	rs116314028	T	C	0.100241	SLC9A3	TRUE	reported	igd	0.167119887872989	1055.43474674524
502534	7.16473e-93	0.0267695	5913	5	0.547211	eqtl-a-ENSG00000066230	rs77045859	C	A	0.050568	SLC9A3	TRUE	reported	igd	0.0660034322855662	417.717047070849
160567590	4.69462e-59	0.0487382	26507	1	0.789779	eqtl-a-ENSG00000066294	rs115503831	T	C	0.014861	CD84	TRUE	reported	igd	0.00980913092382506	262.566564947775
160471844	1e-200	0.022383	31315	1	-0.7209	eqtl-a-ENSG00000066294	rs2050523	G	A	0.92911	CD84	TRUE	reported	igd	0.0320632845517828	1037.25544567762
160414093	9.10123e-31	0.0146038	31526	1	0.168412	eqtl-a-ENSG00000066294	rs11265403	G	T	0.207674	CD84	TRUE	reported	igd	0.00420065754518803	132.980132451249
47375889	1e-200	0.0311909	27559	11	-1.09005	eqtl-a-ENSG00000066336	rs11570034	G	A	0.0347167	SPI1	TRUE	reported	igd	0.042436649404026	1221.25261675785
47862640	5.21375e-09	0.0348025	21614	11	0.203254	eqtl-a-ENSG00000066336	rs72895725	G	A	0.0300804	SPI1	TRUE	reported	igd	0.00157556879397168	34.1049274347026
47853793	2.08257e-25	0.0271608	25631	11	0.282926	eqtl-a-ENSG00000066336	rs72895718	T	C	0.0501685	SPI1	TRUE	reported	igd	0.0042156094319629	108.49924457055
29920713	8.3888e-16	0.0119445	7202	6	0.0961328	eqtl-a-ENSG00000066379	rs9260500	C	T	0.553356	POLR1H	TRUE	reported	igd	0.00891385412390595	64.756984001012
29986501	7.58578e-197	0.0231868	4948	6	0.694026	eqtl-a-ENSG00000066379	rs6932091	T	C	0.0663595	POLR1H	TRUE	reported	igd	0.153308238057871	895.559139131031
29944651	8.07607e-42	0.0119658	6784	6	-0.162118	eqtl-a-ENSG00000066379	rs2246068	C	G	0.424016	POLR1H	TRUE	reported	igd	0.0263450030522864	183.506284321161
29750776	1.79473e-23	0.0216393	13560	6	0.216045	eqtl-a-ENSG00000066379	rs9468618	T	C	0.0818115	POLR1H	TRUE	reported	igd	0.00729728893085011	99.6639197428102
30393360	3.6116e-12	0.0118952	31470	11	0.0826918	eqtl-a-ENSG00000066382	rs640245	T	C	0.477526	MPPED2	TRUE	reported	igd	0.00153326862971704	48.3229893636211
30600383	9.0261e-90	0.0133802	31340	11	0.268809	eqtl-a-ENSG00000066382	rs3781852	T	G	0.259923	MPPED2	TRUE	reported	igd	0.012714698882895	403.58469141728
30060779	2.044e-10	0.0120641	31352	11	-0.0767024	eqtl-a-ENSG00000066382	rs501477	G	A	0.414518	MPPED2	TRUE	reported	igd	0.00128766595191189	40.4203755337761
128475248	2.14482e-10	0.0360042	29099	5	-0.228648	eqtl-a-ENSG00000066583	rs10080172	T	G	0.0280345	ISOC1	TRUE	reported	igd	0.0013840408887117	40.3272523049637
128525698	8.46253e-10	0.0183273	30688	5	-0.112453	eqtl-a-ENSG00000066583	rs2112699	C	T	0.119449	ISOC1	TRUE	reported	igd	0.00122530458704139	37.645824158977
128280809	4.50817e-189	0.0131769	26444	5	-0.386456	eqtl-a-ENSG00000066583	rs2577431	C	A	0.259788	ISOC1	TRUE	reported	igd	0.0315024960628993	860.083787009204
128278704	1e-200	0.0128436	27602	5	-0.39021	eqtl-a-ENSG00000066583	rs2526206	C	T	0.279913	ISOC1	TRUE	reported	igd	0.032359134466149	922.978909921274
128107509	1e-200	0.012123	31343	5	-0.373417	eqtl-a-ENSG00000066583	rs13181669	G	C	0.344593	ISOC1	TRUE	reported	igd	0.0293816312617615	948.724787242519
128370594	1.15213e-28	0.0235855	30964	5	0.261981	eqtl-a-ENSG00000066583	rs141844349	C	A	0.0677125	ISOC1	TRUE	reported	igd	0.00396885539567076	123.373351753547
127840356	6.42688e-19	0.0358038	28129	5	0.318096	eqtl-a-ENSG00000066583	rs115494457	C	T	0.0282792	ISOC1	TRUE	reported	igd	0.00279825255361459	78.927308117006
50370254	1.17071e-09	0.0166598	29863	7	0.101361	eqtl-a-ENSG00000066583	rs149007767	T	C	0.149708	ISOC1	TRUE	reported	igd	0.00123802886283749	37.0146050225549
66429778	1e-200	0.0217017	29452	8	0.67349	eqtl-a-ENSG00000066855	rs72664750	G	T	0.0762194	MTFR1	TRUE	reported	igd	0.0316654333292255	963.042158819009
66797673	6.85646e-19	0.0331732	29058	8	-0.294485	eqtl-a-ENSG00000066855	rs118107026	A	G	0.0331068	MTFR1	TRUE	reported	igd	0.00270464145820387	78.7991857542354
66839800	2.16721e-38	0.0411466	26497	8	0.533108	eqtl-a-ENSG00000066855	rs143568834	C	T	0.0211231	MTFR1	TRUE	reported	igd	0.00629539646945043	167.853232102855
66560488	1.10662e-119	0.0342748	27155	8	0.797266	eqtl-a-ENSG00000066855	rs140146852	A	G	0.0299366	MTFR1	TRUE	reported	igd	0.0195361246945345	541.034103541476
66546130	1.5787e-65	0.0475897	25440	8	0.813618	eqtl-a-ENSG00000066855	rs141623092	A	C	0.0155659	MTFR1	TRUE	reported	igd	0.0113589113771064	292.267832013048
28303030	4.15738e-10	0.0154844	31355	3	0.0967466	eqtl-a-ENSG00000066923	rs4502545	A	G	0.179583	STAG3	TRUE	reported	igd	0.00124347049811615	39.0350694847319
99635967	1e-200	0.0154524	31141	7	-0.541529	eqtl-a-ENSG00000066923	rs72615157	A	G	0.163071	STAG3	TRUE	reported	igd	0.0379420029855596	1228.0715244131
99781192	8.93305e-15	0.0458295	21717	7	0.355353	eqtl-a-ENSG00000066923	rs148654444	C	T	0.0170859	STAG3	TRUE	reported	igd	0.00276076385448844	60.1159530504763
99809032	1.04232e-105	0.0294514	27566	7	-0.643115	eqtl-a-ENSG00000066923	rs80044214	T	C	0.0412024	STAG3	TRUE	reported	igd	0.017003703358122	476.797400930623
99767773	1.02542e-28	0.0444061	27405	7	-0.493707	eqtl-a-ENSG00000066923	rs138791019	A	G	0.018137	STAG3	TRUE	reported	igd	0.00449023450406996	123.600893110006
173363667	3.21159e-09	0.0120869	31684	5	0.0715608	eqtl-a-ENSG00000066926	rs17076724	T	G	0.409824	FECH	TRUE	reported	igd	0.00110509676756597	35.0504098846906
26093141	2.29959e-08	0.0272867	29606	6	-0.15247	eqtl-a-ENSG00000066926	rs1800562	A	G	0.0499676	FECH	TRUE	reported	igd	0.00105348721322851	31.2203256743076
33875262	8.87565e-15	0.0128911	31185	17	-0.0999605	eqtl-a-ENSG00000066926	rs8073060	A	T	0.305723	FECH	TRUE	reported	igd	0.00192439658018382	60.1241612902455
55330585	1.87888e-12	0.0431217	19720	18	-0.303715	eqtl-a-ENSG00000066926	rs144606835	A	G	0.0193581	FECH	TRUE	reported	igd	0.00250924290578142	49.6017143660857
55401529	8.54673e-23	0.0432746	10087	18	-0.42529	eqtl-a-ENSG00000066926	rs144609264	A	C	0.019154	FECH	TRUE	reported	igd	0.00948426274523872	96.5646341478889
55215573	1e-200	0.0153511	31683	18	0.846972	eqtl-a-ENSG00000066926	rs1062010	C	A	0.144543	FECH	TRUE	reported	igd	0.0876578007975434	3043.90917080743
55343687	1.7869e-34	0.0388507	30508	18	-0.475723	eqtl-a-ENSG00000066926	rs35281475	T	C	0.023788	FECH	TRUE	reported	igd	0.00489066218215309	149.927786685157
11297258	9.02298e-10	0.0244649	31569	19	0.149867	eqtl-a-ENSG00000066926	rs12974711	C	T	0.0629954	FECH	TRUE	reported	igd	0.00118726696176743	37.5230060074515
4157072	1.88495e-21	0.0123135	31569	20	0.117118	eqtl-a-ENSG00000066926	rs6084653	G	C	0.36636	FECH	TRUE	reported	igd	0.00285746344503403	90.4600348121012
37469591	5.64326e-09	0.0119193	31300	22	-0.0694563	eqtl-a-ENSG00000066926	rs4820268	A	G	0.53552	FECH	TRUE	reported	igd	0.00108369370878736	33.9542416957392
130349119	3.83398e-09	0.0141804	31300	6	-0.0835425	eqtl-a-ENSG00000067057	rs6569648	T	C	0.772526	PFKP	TRUE	reported	igd	0.00110767488873467	34.7064521331226
2933379	7.71792e-49	0.0119168	31231	10	0.175031	eqtl-a-ENSG00000067057	rs10794966	G	A	0.565683	PFKP	TRUE	reported	igd	0.00686017436418218	215.716236212649
3135350	1e-200	0.0120425	31355	10	-0.446935	eqtl-a-ENSG00000067057	rs75961101	T	C	0.334304	PFKP	TRUE	reported	igd	0.0420801973975913	1377.29737439647
3167109	1e-200	0.0143561	31558	10	-0.692085	eqtl-a-ENSG00000067057	rs730141	T	C	0.179965	PFKP	TRUE	reported	igd	0.0685924338709555	2323.90515381747
3118666	1.3937e-09	0.0166273	31354	10	-0.100696	eqtl-a-ENSG00000067057	rs58639902	G	A	0.150424	PFKP	TRUE	reported	igd	0.00116836975436519	36.6735768368181
3230735	8.01124e-11	0.0184416	28758	10	-0.119876	eqtl-a-ENSG00000067057	rs56969892	G	A	0.1177	PFKP	TRUE	reported	igd	0.00146713802474435	42.2510091015852
3100322	1e-200	0.0225714	28470	10	-0.938852	eqtl-a-ENSG00000067057	rs10736965	G	A	0.933661	PFKP	TRUE	reported	igd	0.057288644730596	1730.00264510926
41347517	2.61222e-10	0.0131994	31569	13	-0.0834227	eqtl-a-ENSG00000067057	rs9315786	G	A	0.282623	PFKP	TRUE	reported	igd	0.00126371780813328	39.9422557892811
127009395	9.4254e-12	0.0158246	31569	9	-0.107843	eqtl-a-ENSG00000067082	rs55793580	T	C	0.169838	KLF6	TRUE	reported	igd	0.00146899111885633	46.439862394356
3818682	2.59759e-08	0.0408165	24857	10	0.227213	eqtl-a-ENSG00000067082	rs78616463	C	T	0.0216864	KLF6	TRUE	reported	igd	0.00124510230979818	30.9855981498607
3910816	2.69464e-14	0.0118792	31568	10	-0.0904267	eqtl-a-ENSG00000067082	rs11252145	T	C	0.501283	KLF6	TRUE	reported	igd	0.00183221088518528	57.941730270667
111884608	2.95801e-21	0.0119081	28418	12	0.112702	eqtl-a-ENSG00000067082	rs3184504	C	T	0.542056	KLF6	TRUE	reported	igd	0.00314208588120557	89.5669394160997
72561112	2.26548e-08	0.0529438	6612	15	-0.295977	eqtl-a-ENSG00000067141	rs74928164	C	T	0.0127727	NEO1	TRUE	reported	igd	0.00470440762527724	31.2431147503515
73236667	1e-200	0.0189396	31567	15	0.577949	eqtl-a-ENSG00000067141	rs2415214	C	T	0.103314	NEO1	TRUE	reported	igd	0.0286535396873079	931.129125583797
73365051	3.37754e-65	0.0213299	31183	15	0.363718	eqtl-a-ENSG00000067141	rs28462360	G	A	0.083212	NEO1	TRUE	reported	igd	0.00923853612560645	290.75292634621
73453239	5.39014e-18	0.0477473	18767	15	-0.412761	eqtl-a-ENSG00000067141	rs145578343	T	C	0.0157026	NEO1	TRUE	reported	igd	0.00396623900025052	74.7228434957836
71645268	1.18032e-152	0.0116222	31565	8	0.305876	eqtl-a-ENSG00000067167	rs34270993	C	G	0.495772	TRAM1	TRUE	reported	igd	0.0214724392951656	692.606553652038
71464172	2.46093e-24	0.015037	30902	8	0.15306	eqtl-a-ENSG00000067167	rs268590	C	T	0.807372	TRAM1	TRUE	reported	igd	0.00334164830875469	103.60313799137
71666446	1.06047e-89	0.0117371	27307	8	0.235703	eqtl-a-ENSG00000067167	rs13255619	C	T	0.501889	TRAM1	TRUE	reported	igd	0.0145535073198978	403.25225197063
56849749	2.84368e-08	0.012237	31684	3	-0.0679263	eqtl-a-ENSG00000067182	rs1354034	C	T	0.618137	TNFRSF1A	TRUE	reported	igd	0.000971547079048726	30.8104883984293
144385777	3.31818e-19	0.0265823	25735	6	-0.238111	eqtl-a-ENSG00000067182	rs149110519	T	C	0.0526158	TNFRSF1A	TRUE	reported	igd	0.00310811939991248	80.2306028110114
28724374	1.0306e-10	0.013108	31355	7	0.0847115	eqtl-a-ENSG00000067182	rs56388170	T	G	0.289189	TNFRSF1A	TRUE	reported	igd	0.00133023073157756	41.762277592225
6442346	1e-200	0.0118546	31075	12	-0.37004	eqtl-a-ENSG00000067182	rs1800692	G	A	0.619212	TNFRSF1A	TRUE	reported	igd	0.0304021326644858	974.30646261588
38166879	6.2997e-09	0.0122477	31684	17	0.0711444	eqtl-a-ENSG00000067182	rs8078723	C	T	0.379928	TNFRSF1A	TRUE	reported	igd	0.00106382477031789	33.7399898101218
56849749	1.71633e-24	0.0122053	25690	3	0.124663	eqtl-a-ENSG00000067365	rs1354034	C	T	0.618137	METTL22	TRUE	reported	igd	0.00404440002324624	104.314437109018
50427982	3.0903e-11	0.0119459	25690	7	0.0793485	eqtl-a-ENSG00000067365	rs6592965	A	G	0.449532	METTL22	TRUE	reported	igd	0.00171447186967224	44.1169907277177
8690917	3.77138e-17	0.0251594	25245	16	-0.211835	eqtl-a-ENSG00000067365	rs34951641	G	A	0.0591844	METTL22	TRUE	reported	igd	0.00280028121345042	70.8859994035554
8729124	2.30144e-123	0.013336	25306	16	-0.315021	eqtl-a-ENSG00000067365	rs2302607	A	G	0.258341	METTL22	TRUE	reported	igd	0.0215740799374091	557.947727612611
8739977	1.3712e-31	0.050277	5896	16	-0.587929	eqtl-a-ENSG00000067365	rs1060541	G	A	0.0140773	METTL22	TRUE	reported	igd	0.0226671069913416	136.698487856771
8820312	1.1207e-09	0.0144853	24908	16	-0.0882343	eqtl-a-ENSG00000067365	rs8059762	C	A	0.785689	METTL22	TRUE	reported	igd	0.0014874233099924	37.1009497761906
8462582	1.46016e-11	0.0120205	24908	16	-0.081159	eqtl-a-ENSG00000067365	rs36090319	C	G	0.424943	METTL22	TRUE	reported	igd	0.00182681828203812	45.5820061746533
8762414	1.77787e-28	0.0122274	31569	2	0.135345	eqtl-a-ENSG00000067836	rs3896594	G	T	0.377086	ROGDI	TRUE	reported	igd	0.00386610004589418	122.514834757019
135426573	1.13318e-36	0.0132701	31300	6	-0.167854	eqtl-a-ENSG00000067836	rs4895441	G	A	0.273956	ROGDI	TRUE	reported	igd	0.00508576520208032	159.987940394722
50427982	4.12382e-22	0.0119252	31684	7	-0.115291	eqtl-a-ENSG00000067836	rs6592965	A	G	0.449532	ROGDI	TRUE	reported	igd	0.00294130586973984	93.4613509853447
4259996	8.38147e-09	0.0253054	26235	16	0.145774	eqtl-a-ENSG00000067836	rs12923343	C	T	0.941375	ROGDI	TRUE	reported	igd	0.00126329178681185	33.1818518042908
4482400	2.45754e-13	0.0300028	26617	16	-0.219654	eqtl-a-ENSG00000067836	rs34860010	G	A	0.0408736	ROGDI	TRUE	reported	igd	0.00200965678259522	53.5947222658848
4816102	1e-200	0.0121863	28588	16	0.689669	eqtl-a-ENSG00000067836	rs58729822	C	T	0.264237	ROGDI	TRUE	reported	igd	0.100747767491525	3202.63389669771
4498322	1.48525e-14	0.0328198	17937	16	0.252349	eqtl-a-ENSG00000067836	rs11645084	A	G	0.0338983	ROGDI	TRUE	reported	igd	0.00328512913240813	59.112984778138
4631802	1.739e-31	0.0344077	20319	16	0.401666	eqtl-a-ENSG00000067836	rs117837409	G	A	0.0305694	ROGDI	TRUE	reported	igd	0.00666213634468828	136.262422955418
4965785	8.37529e-138	0.013008	31554	16	-0.325037	eqtl-a-ENSG00000067836	rs872297	A	T	0.722535	ROGDI	TRUE	reported	igd	0.0194035169983195	624.334044577568
33875262	5.70033e-15	0.0128907	31185	17	0.100683	eqtl-a-ENSG00000067836	rs8073060	A	T	0.305723	ROGDI	TRUE	reported	igd	0.00195238205104467	61.0002252425993
43831259	1.62592e-17	0.0135488	31569	18	0.115404	eqtl-a-ENSG00000067836	rs9944715	G	A	0.740866	ROGDI	TRUE	reported	igd	0.00229288516449805	72.5458452800988
19473445	5.36636e-10	0.0128154	31683	19	0.0795565	eqtl-a-ENSG00000067836	rs2905424	C	T	0.686812	ROGDI	TRUE	reported	igd	0.00121487829170197	38.5353749498993
240241255	4.00682e-98	0.0119123	31683	2	-0.250436	eqtl-a-ENSG00000068024	rs925738	T	C	0.410854	HDAC4	TRUE	reported	igd	0.013758130087846	441.951748967901
239970530	7.2277e-132	0.0320312	25847	2	-0.782687	eqtl-a-ENSG00000068024	rs79040455	C	T	0.034301	HDAC4	TRUE	reported	igd	0.0225788293568496	597.030085141085
56849749	2.62452e-08	0.0122369	31684	3	-0.0680961	eqtl-a-ENSG00000068024	rs1354034	C	T	0.618137	HDAC4	TRUE	reported	igd	0.000976421629201411	30.9652251719701
94436851	9.49948e-10	0.0118933	31684	10	-0.0727594	eqtl-a-ENSG00000068024	rs7911264	C	T	0.515223	HDAC4	TRUE	reported	igd	0.00117983362193893	37.4236424819249
50408855	5.48656e-14	0.0374331	27650	3	0.28149	eqtl-a-ENSG00000068028	rs11914549	A	G	0.0258472	RASSF1	TRUE	reported	igd	0.00204094799816014	56.5435326629289
50311900	3.09314e-34	0.0279159	5878	3	-0.340582	eqtl-a-ENSG00000068028	rs2071203	T	C	0.0472099	RASSF1	TRUE	reported	igd	0.0246973267693064	148.796364533411
50015625	2.99089e-13	0.0334272	28215	3	-0.243838	eqtl-a-ENSG00000068028	rs34691305	A	G	0.0326491	RASSF1	TRUE	reported	igd	0.00188236764128837	53.2073941406765
5225447	3.60122e-10	0.0176225	31684	11	0.110504	eqtl-a-ENSG00000068079	rs7950726	A	C	0.130877	IFI35	TRUE	reported	igd	0.00123948797516393	39.3181924558979
41397048	2.84905e-14	0.0333924	29136	17	-0.253942	eqtl-a-ENSG00000068079	rs138923296	G	A	0.0327085	IFI35	TRUE	reported	igd	0.00198099184484828	57.8287747389653
41624590	3.48177e-71	0.0521048	24917	17	-0.929523	eqtl-a-ENSG00000068079	rs77106873	T	C	0.0129271	IFI35	TRUE	reported	igd	0.0126112242445608	318.221818769242
58417413	3.58426e-13	0.0452778	22368	17	-0.329183	eqtl-a-ENSG00000068097	rs149054239	A	G	0.0175215	HEATR6	TRUE	reported	igd	0.00235750135735111	52.8524751403978
58210784	1e-200	0.0255683	31355	17	1.30914	eqtl-a-ENSG00000068097	rs345168	T	C	0.0480023	HEATR6	TRUE	reported	igd	0.0771593220432596	2621.45
58209410	6.26325e-66	0.0494771	11611	17	0.848546	eqtl-a-ENSG00000068097	rs72843518	T	C	0.0143819	HEATR6	TRUE	reported	igd	0.0247063217212295	294.081357492171
57788608	1e-200	0.0251894	30656	17	0.84006	eqtl-a-ENSG00000068097	rs77913816	A	G	0.0547477	HEATR6	TRUE	reported	igd	0.0350100140664167	1112.13275457327
57207791	7.18787e-13	0.0123246	31562	17	-0.0884392	eqtl-a-ENSG00000068097	rs12051896	G	A	0.63282	HEATR6	TRUE	reported	igd	0.00162881390331748	51.4892331675543
58470653	5.1074e-13	0.0293764	26317	17	-0.212168	eqtl-a-ENSG00000068097	rs117213633	A	C	0.042722	HEATR6	TRUE	reported	igd	0.00197818212845216	52.1590427965159
144385777	3.55067e-10	0.0266207	25735	6	0.166986	eqtl-a-ENSG00000068305	rs149110519	T	C	0.0526158	MEF2A	TRUE	reported	igd	0.0015266289551878	39.3448078267123
50370254	1.74141e-14	0.016647	30077	7	0.127656	eqtl-a-ENSG00000068305	rs149007767	T	C	0.149708	MEF2A	TRUE	reported	igd	0.00195131649288112	58.800582068982
100004180	1.00231e-10	0.0188783	30935	15	-0.122077	eqtl-a-ENSG00000068305	rs10083668	C	T	0.111543	MEF2A	TRUE	reported	igd	0.00134991105594994	41.8132428525113
100051136	2.31686e-83	0.0117569	31300	15	-0.227418	eqtl-a-ENSG00000068305	rs8026614	T	C	0.481468	MEF2A	TRUE	reported	igd	0.0118129628522751	374.141834948231
100186866	1.22011e-54	0.016052	31345	15	0.249883	eqtl-a-ENSG00000068305	rs78547437	C	T	0.161115	MEF2A	TRUE	reported	igd	0.00767188601940417	242.318967001359
86382938	1e-200	0.0369358	28586	2	1.12505	eqtl-a-ENSG00000068615	rs114534559	T	C	0.0249883	REEP1	TRUE	reported	igd	0.0314357393106372	927.722825345336
85983820	6.18785e-09	0.011891	20187	2	0.0691045	eqtl-a-ENSG00000068615	rs56309153	G	A	0.49153	REEP1	TRUE	reported	igd	0.00167023713608608	33.770140735044
87100752	7.70726e-21	0.025455	23564	2	0.238356	eqtl-a-ENSG00000068615	rs192892473	T	C	0.0576559	REEP1	TRUE	reported	igd	0.00370718244517945	87.6736550080688
86167829	1e-200	0.0130267	31684	2	-0.395599	eqtl-a-ENSG00000068615	rs2033770	T	C	0.732497	REEP1	TRUE	reported	igd	0.0282840042747663	922.176672376738
56849749	1.17355e-15	0.0122226	31684	3	-0.0978702	eqtl-a-ENSG00000068615	rs1354034	C	T	0.618137	REEP1	TRUE	reported	igd	0.00201955544142801	64.1130353246788
48570686	9.517e-49	0.0197585	28458	3	-0.289924	eqtl-a-ENSG00000068745	rs11710798	C	A	0.0992174	IP6K2	TRUE	reported	igd	0.00750900842600787	215.292980575683
48731961	5.39511e-162	0.0210619	28587	3	0.571244	eqtl-a-ENSG00000068745	rs72929172	G	A	0.082745	IP6K2	TRUE	reported	igd	0.0250868175508744	735.559527352239
48382538	4.76135e-08	0.01243	31560	3	-0.0678666	eqtl-a-ENSG00000068745	rs34008503	A	G	0.354352	IP6K2	TRUE	reported	igd	0.000943675991423273	29.8086566509537
45899902	1.45388e-09	0.0265528	28255	2	-0.160626	eqtl-a-ENSG00000068784	rs80089451	T	C	0.052912	SRBD1	TRUE	reported	igd	0.00129346184330549	36.5915071772327
45662988	2.32772e-10	0.0415252	25149	2	0.263195	eqtl-a-ENSG00000068784	rs7566461	G	A	0.0209226	SRBD1	TRUE	reported	igd	0.00159484285934224	40.1695775477941
45571350	1e-200	0.0117059	31231	2	-0.388077	eqtl-a-ENSG00000068784	rs6717619	C	T	0.600818	SRBD1	TRUE	reported	igd	0.0339953499253082	1099.00173123945
111884608	1.25256e-16	0.0119169	28418	12	-0.0986472	eqtl-a-ENSG00000068784	rs3184504	C	T	0.542056	SRBD1	TRUE	reported	igd	0.00240548955922847	68.5192135678804
56849749	7.40628e-44	0.0121675	31684	3	0.168992	eqtl-a-ENSG00000068796	rs1354034	C	T	0.618137	KIF2A	TRUE	reported	igd	0.00605136735089921	192.886648377605
61694379	9.81748e-58	0.0118174	31679	5	-0.189272	eqtl-a-ENSG00000068796	rs247264	C	T	0.470456	KIF2A	TRUE	reported	igd	0.00803257551642893	256.508317061306
54712308	2.94971e-10	0.0120844	31684	12	0.0761489	eqtl-a-ENSG00000068796	rs10876550	A	G	0.590064	KIF2A	TRUE	reported	igd	0.00125167950541302	39.7054085366148
33944055	7.41361e-10	0.0155632	31185	17	0.095824	eqtl-a-ENSG00000068796	rs16971217	G	C	0.177288	KIF2A	TRUE	reported	igd	0.00121416419279685	37.9073077196627
54119870	3.16957e-13	0.0251853	31236	2	0.18353	eqtl-a-ENSG00000068878	rs77215245	C	T	0.0591338	PSME4	TRUE	reported	igd	0.00169717551685405	53.0996996035388
54196772	1.17761e-157	0.0201807	31569	2	-0.539868	eqtl-a-ENSG00000068878	rs2293360	G	T	0.0910772	PSME4	TRUE	reported	igd	0.0221669831606967	715.60802855229
56849749	2.85023e-08	0.012237	31684	3	-0.0679227	eqtl-a-ENSG00000068878	rs1354034	C	T	0.618137	PSME4	TRUE	reported	igd	0.000971444200511316	30.8072226583849
60725451	1.14446e-33	0.0121226	31355	2	-0.146603	eqtl-a-ENSG00000068971	rs7606173	C	G	0.393094	PPP2R5B	TRUE	reported	igd	0.00464265471139092	146.240095434302
56849749	1.98779e-09	0.0122348	31470	3	-0.0733951	eqtl-a-ENSG00000068971	rs1354034	C	T	0.618137	PPP2R5B	TRUE	reported	igd	0.00114221353136945	35.9842771333923
135426573	9.86279e-15	0.0133169	31086	6	-0.103085	eqtl-a-ENSG00000068971	rs4895441	G	A	0.273956	PPP2R5B	TRUE	reported	igd	0.00192390438705345	59.9179203169303
50427982	1e-200	0.0115435	31470	7	-0.373814	eqtl-a-ENSG00000068971	rs6592965	A	G	0.449532	PPP2R5B	TRUE	reported	igd	0.0322480474131548	1048.59675383201
64781891	4.13714e-12	0.0297346	28166	11	-0.206129	eqtl-a-ENSG00000068971	rs58717149	G	T	0.0416649	PPP2R5B	TRUE	reported	igd	0.00170328945083368	48.0532927599156
205198	2e-08	0.0131201	31470	11	-0.0736312	eqtl-a-ENSG00000068971	rs3782123	A	C	0.711357	PPP2R5B	TRUE	reported	igd	0.000999811881622137	31.4935679343008
54698408	1.61399e-13	0.0200039	30530	12	-0.147575	eqtl-a-ENSG00000068971	rs79755767	A	G	0.0977363	PPP2R5B	TRUE	reported	igd	0.00177949150072638	54.4211585232267
27179590	4.24893e-10	0.0144503	27110	17	0.0902366	eqtl-a-ENSG00000068971	rs35033748	C	T	0.215702	PPP2R5B	TRUE	reported	igd	0.00143634232475551	38.9923741367879
33875262	1.87802e-10	0.0129	30971	17	0.0821887	eqtl-a-ENSG00000068971	rs8073060	A	T	0.305723	PPP2R5B	TRUE	reported	igd	0.00130894299848015	40.5897854353872
19473445	3.90301e-14	0.0128069	31469	19	0.0968715	eqtl-a-ENSG00000068971	rs2905424	C	T	0.686812	PPP2R5B	TRUE	reported	igd	0.00181481428882308	57.2105878186412
55991637	3.42847e-13	0.0118835	26118	20	0.0864703	eqtl-a-ENSG00000068971	rs6014993	G	A	0.490224	PPP2R5B	TRUE	reported	igd	0.00202313910560882	52.9434127708411
66500000	1.86638e-188	0.0129598	14263	5	-0.37946	eqtl-a-ENSG00000069020	rs10471698	G	A	0.273798	MAST4	TRUE	reported	igd	0.056698928481232	857.184883474143
66864214	2.0303e-08	0.0119067	14262	5	0.0667896	eqtl-a-ENSG00000069020	rs9885568	A	G	0.47371	MAST4	TRUE	reported	igd	0.0022013916969659	31.4611038114417
66354787	8.70964e-11	0.0161384	14263	5	-0.104701	eqtl-a-ENSG00000069020	rs152630	G	A	0.161777	MAST4	TRUE	reported	igd	0.00294232138674081	42.0842707461726
71778587	1.13789e-15	0.0314221	29704	17	-0.25172	eqtl-a-ENSG00000069188	rs117431114	A	G	0.0370904	SDK2	TRUE	reported	igd	0.00215582162992001	64.1705543208932
71542216	1e-200	0.0169825	31559	17	-0.524934	eqtl-a-ENSG00000069188	rs11657442	C	A	0.132627	SDK2	TRUE	reported	igd	0.0293852777725235	955.385478328027
71708855	4.60999e-78	0.0132455	31684	17	0.247742	eqtl-a-ENSG00000069188	rs2661611	G	T	0.269834	SDK2	TRUE	reported	igd	0.0109207794873621	349.812359357099
71780602	2.76032e-08	0.0140214	31183	17	0.0779055	eqtl-a-ENSG00000069188	rs9893480	C	G	0.235024	SDK2	TRUE	reported	igd	0.00098902175940636	30.8692178081578
205719513	7.38924e-20	0.029266	29981	1	0.266962	eqtl-a-ENSG00000069275	rs115521489	G	A	0.0429615	NUCKS1	TRUE	reported	igd	0.00276772139529588	83.2038046599024
205646278	1e-200	0.0115251	31567	1	-0.354361	eqtl-a-ENSG00000069275	rs1418653	A	C	0.492677	NUCKS1	TRUE	reported	igd	0.0290772804949414	945.311444860102
205725028	9.50167e-25	0.025214	26609	1	-0.258978	eqtl-a-ENSG00000069275	rs823122	T	C	0.941242	NUCKS1	TRUE	reported	igd	0.00394907369608548	105.489589996814
16170764	1.65798e-09	0.0118959	31355	17	0.0717123	eqtl-a-ENSG00000069399	rs7210990	A	C	0.481977	BCL3	TRUE	reported	igd	0.0011576648047279	36.3383
38128648	1.23367e-16	0.0119219	31470	17	0.0987122	eqtl-a-ENSG00000069399	rs3859192	T	C	0.455547	BCL3	TRUE	reported	igd	0.00217374650305257	68.5524706514124
45242173	8.7882e-09	0.024612	31351	19	0.141585	eqtl-a-ENSG00000069399	rs1531517	A	G	0.0622122	BCL3	TRUE	reported	igd	0.00105446238136462	33.0912346554967
46205686	4.59791e-08	0.0122269	31256	3	0.0668323	eqtl-a-ENSG00000069667	rs7616215	T	C	0.616408	RORA	TRUE	reported	igd	0.000954974461939403	29.8753019838914
60761489	1.75146e-33	0.0158883	31254	15	-0.191588	eqtl-a-ENSG00000069667	rs62003261	C	T	0.166673	RORA	TRUE	reported	igd	0.00463084574752333	145.396500065633
61128890	1.4065e-08	0.0121873	31256	15	0.0691337	eqtl-a-ENSG00000069667	rs341398	A	G	0.390225	RORA	TRUE	reported	igd	0.00102845269019941	32.1763522355098
111871897	2.57537e-09	0.0119022	31470	2	0.0708979	eqtl-a-ENSG00000069696	rs1439287	A	G	0.476061	DRD4	TRUE	reported	igd	0.00112622748727616	35.4800852168284
135837906	2.32632e-08	0.0119736	24977	2	-0.066882	eqtl-a-ENSG00000069696	rs7570971	A	C	0.441154	DRD4	TRUE	reported	igd	0.00124763215674027	31.198537413108
606770	4.02254e-58	0.0243563	23973	11	-0.391447	eqtl-a-ENSG00000069696	rs72844713	T	C	0.0625523	DRD4	TRUE	reported	igd	0.0106597398502094	258.277798086052
92151760	1.04376e-15	0.0155528	31674	1	0.12476	eqtl-a-ENSG00000069702	rs4658259	C	A	0.177168	TGFBR3	TRUE	reported	igd	0.00202744575324	64.3437152889274
92022364	9.93345e-33	0.0134524	31556	1	-0.16028	eqtl-a-ENSG00000069702	rs36048657	C	T	0.737076	TGFBR3	TRUE	reported	igd	0.00447845114136343	141.948757891375
56849749	2.27772e-11	0.012231	31684	3	-0.0817911	eqtl-a-ENSG00000069702	rs1354034	C	T	0.618137	TGFBR3	TRUE	reported	igd	0.00140940443167798	44.7157738142013
38051348	2.60549e-10	0.0118868	31300	17	-0.0751332	eqtl-a-ENSG00000069702	rs8067378	G	A	0.497388	TGFBR3	TRUE	reported	igd	0.00127478087802728	39.9490181649505
56276168	1e-200	0.0258488	29788	15	0.964238	eqtl-a-ENSG00000069869	rs12101804	A	T	0.0508437	NEDD4	TRUE	reported	igd	0.0446291243190146	1391.4209976504
56274991	2.6485e-48	0.0318057	28960	15	0.464494	eqtl-a-ENSG00000069869	rs117280067	G	A	0.0357756	NEDD4	TRUE	reported	igd	0.00731080228473268	213.265353394137
55591685	2.52703e-08	0.0357727	29100	15	-0.1993	eqtl-a-ENSG00000069869	rs149350059	A	G	0.0284287	NEDD4	TRUE	reported	igd	0.00106550423012891	31.0371122626978
56283412	3.0318e-15	0.0487644	11218	15	-0.384727	eqtl-a-ENSG00000069869	rs17238531	T	C	0.0150578	NEDD4	TRUE	reported	igd	0.00551799187593484	62.2331991679071
56090807	5.37155e-12	0.0253864	30039	15	-0.175044	eqtl-a-ENSG00000069869	rs72732238	C	T	0.0581638	NEDD4	TRUE	reported	igd	0.00158022861684771	47.5404517465623
56299233	5.33335e-61	0.0235382	31684	15	0.387853	eqtl-a-ENSG00000069869	rs62046379	A	G	0.0672517	NEDD4	TRUE	reported	igd	0.00849653875577424	271.494101011649
236102886	1.37899e-10	0.0201173	31569	1	-0.129117	eqtl-a-ENSG00000069943	rs6701752	A	G	0.903393	PIGB	TRUE	reported	igd	0.00130316772663881	41.1907741142682
28277107	5.13925e-09	0.0122846	31569	7	0.0717728	eqtl-a-ENSG00000069943	rs2158799	G	C	0.625845	PIGB	TRUE	reported	igd	0.00108010897457742	34.1326670004387
28724374	1.26707e-18	0.0130914	31355	7	0.115317	eqtl-a-ENSG00000069943	rs56388170	T	G	0.289189	PIGB	TRUE	reported	igd	0.00246850662165919	77.5866111723115
127009395	3.25837e-19	0.0158057	31569	9	-0.141611	eqtl-a-ENSG00000069943	rs55793580	T	C	0.169838	PIGB	TRUE	reported	igd	0.00253631259974733	80.2673629602485
112059557	4.1151e-10	0.0120469	28418	12	-0.0752857	eqtl-a-ENSG00000069943	rs11065979	T	C	0.418831	PIGB	TRUE	reported	igd	0.00137241174097327	39.0520475200219
8208244	3.81066e-15	0.0126221	31684	12	0.099222	eqtl-a-ENSG00000069943	rs11057065	T	C	0.669185	PIGB	TRUE	reported	igd	0.00194655425993483	61.791
54685880	1.57217e-20	0.0255711	29836	12	-0.237502	eqtl-a-ENSG00000069943	rs35979828	T	C	0.0571059	PIGB	TRUE	reported	igd	0.00288297750077447	86.2594347677706
55616230	1.77828e-105	0.0131468	23479	15	0.286763	eqtl-a-ENSG00000069943	rs144664389	C	T	0.272549	PIGB	TRUE	reported	igd	0.0198615863446219	475.739401819465
56849749	2.01372e-65	0.0121257	31684	3	0.20713	eqtl-a-ENSG00000069966	rs1354034	C	T	0.618137	GNB5	TRUE	reported	igd	0.00912538236306147	291.772903332604
243268	9.93711e-09	0.0143038	31569	11	0.081988	eqtl-a-ENSG00000069966	rs505404	G	T	0.222031	GNB5	TRUE	reported	igd	0.00103964520435068	32.8526352504263
52581150	5.69115e-52	0.0131494	22235	15	-0.19946	eqtl-a-ENSG00000069966	rs12907952	A	C	0.720036	GNB5	TRUE	reported	igd	0.0102421603940331	230.070369668597
52408438	1e-200	0.0322679	27740	15	0.980092	eqtl-a-ENSG00000069966	rs79774918	C	T	0.0330245	GNB5	TRUE	reported	igd	0.0321867689281514	922.488521406446
128297569	6.51388e-09	0.012172	31569	3	-0.0706315	eqtl-a-ENSG00000069998	rs9880192	C	G	0.392874	HDHD5	TRUE	reported	igd	0.00106548947365339	33.6701814387155
17630393	3.7914e-86	0.0272242	30662	22	0.535538	eqtl-a-ENSG00000069998	rs71326301	T	C	0.0489116	HDHD5	TRUE	reported	igd	0.0124630179523328	386.938552545345
17503161	3.22181e-15	0.0146499	30077	22	0.115472	eqtl-a-ENSG00000069998	rs11089393	C	T	0.207303	HDHD5	TRUE	reported	igd	0.00206135779255959	62.123394153869
17653955	3.96278e-129	0.0147616	31678	22	0.356879	eqtl-a-ENSG00000069998	rs2159068	G	C	0.806432	HDHD5	TRUE	reported	igd	0.0181166241053579	584.450454350999
12481460	1.6335e-09	0.0180762	31480	12	-0.109007	eqtl-a-ENSG00000070018	rs35737962	A	G	0.123348	LRP6	TRUE	reported	igd	0.00115387394061968	36.3636029166189
12263221	4.0281e-19	0.0232818	27053	12	0.208055	eqtl-a-ENSG00000070018	rs139311047	A	C	0.0698653	LRP6	TRUE	reported	igd	0.00294325337183796	79.8529744980312
12428341	3.91381e-94	0.0129188	31565	12	0.265906	eqtl-a-ENSG00000070018	rs10845503	A	G	0.290393	LRP6	TRUE	reported	igd	0.0132439017346317	423.627754806906
14610674	2.67178e-11	0.041206	25780	12	0.274589	eqtl-a-ENSG00000070019	rs147200159	A	G	0.0212486	GUCY2C	TRUE	reported	igd	0.0017195507871738	44.4029332906589
14700233	1.34896e-146	0.0120003	31354	12	0.309413	eqtl-a-ENSG00000070019	rs11056020	G	C	0.377194	GUCY2C	TRUE	reported	igd	0.0207628906148871	664.760496021942
14970093	2.14758e-10	0.048081	7459	12	-0.305329	eqtl-a-ENSG00000070019	rs150620413	C	T	0.0155201	GUCY2C	TRUE	reported	igd	0.00537733227234669	40.3155569000857
149761244	6.27625e-18	0.0319377	31138	3	-0.275533	eqtl-a-ENSG00000070087	rs9865402	C	T	0.0358298	PFN2	TRUE	reported	igd	0.00238458278998512	74.4238395559463
149459341	1e-200	0.0123433	30757	3	-0.403643	eqtl-a-ENSG00000070087	rs7633238	G	A	0.684044	PFN2	TRUE	reported	igd	0.0336004450831928	1069.31
149762874	3.93731e-43	0.0354868	28870	3	0.488608	eqtl-a-ENSG00000070087	rs80324146	A	G	0.0285726	PFN2	TRUE	reported	igd	0.00652376290401486	189.564662425746
149789377	8.69961e-53	0.0172853	31026	3	-0.264319	eqtl-a-ENSG00000070087	rs62268859	G	A	0.134798	PFN2	TRUE	reported	igd	0.00748025305536917	233.81637645414
149715493	1.07359e-10	0.0485587	23500	3	-0.3135	eqtl-a-ENSG00000070087	rs114484534	A	G	0.01521	PFN2	TRUE	reported	igd	0.00177053090523691	41.6777269148196
56849749	1.20116e-18	0.0122168	31684	3	0.107686	eqtl-a-ENSG00000070214	rs1354034	C	T	0.618137	SLC44A1	TRUE	reported	igd	0.00244624452013002	77.6919724486198
107676577	6.06234e-10	0.0217616	26617	9	-0.134676	eqtl-a-ENSG00000070214	rs62568200	C	A	0.0811902	SLC44A1	TRUE	reported	igd	0.00143686245410907	38.2971219126898
107758309	4.61849e-22	0.0188734	31567	9	0.182253	eqtl-a-ENSG00000070214	rs72736926	G	A	0.111147	SLC44A1	TRUE	reported	igd	0.00294533529876204	93.2441439740734
32432835	1.0116e-10	0.0132872	29827	6	-0.0859032	eqtl-a-ENSG00000070371	rs9268923	T	C	0.276503	CLTCL1	TRUE	reported	igd	0.00139937464120278	41.7948353065341
19556893	1.67109e-08	0.0204576	31680	22	-0.115438	eqtl-a-ENSG00000070371	rs111735701	A	G	0.0931216	CLTCL1	TRUE	reported	igd	0.00100407641369722	31.8391015239741
19203078	1.87802e-52	0.0163728	31684	22	-0.249543	eqtl-a-ENSG00000070371	rs712951	A	G	0.153595	CLTCL1	TRUE	reported	igd	0.00727834039874285	232.283015367663
19153717	1e-200	0.0116065	29498	22	-0.394807	eqtl-a-ENSG00000070371	rs1206470	T	A	0.583446	CLTCL1	TRUE	reported	igd	0.0377454442755334	1157.01153891957
144385777	5.28324e-21	0.0265746	25735	6	-0.249889	eqtl-a-ENSG00000070413	rs149110519	T	C	0.0526158	DGCR2	TRUE	reported	igd	0.00342410450969399	88.4152243162624
28724374	3.19867e-08	0.0131131	31355	7	-0.0725169	eqtl-a-ENSG00000070413	rs56388170	T	G	0.289189	DGCR2	TRUE	reported	igd	0.000974400562853052	30.5801781899722
19123075	1.14288e-106	0.0124224	31684	22	0.272517	eqtl-a-ENSG00000070413	rs2240112	C	T	0.332613	DGCR2	TRUE	reported	igd	0.0149619833595572	481.225646918883
74905272	9.85145e-11	0.0201443	29863	17	0.130317	eqtl-a-ENSG00000070495	rs1663457	A	G	0.0963123	JMJD6	TRUE	reported	igd	0.00139944603009858	41.8474211121189
74609930	1e-200	0.0118972	29862	17	-0.361094	eqtl-a-ENSG00000070495	rs12951792	A	G	0.377245	JMJD6	TRUE	reported	igd	0.0299252193603166	921.132131184589
74853960	4.4268e-09	0.0308485	27159	17	-0.180997	eqtl-a-ENSG00000070495	rs57642494	C	T	0.0386252	JMJD6	TRUE	reported	igd	0.00126593305261823	34.4225205164294
131813204	1.72639e-08	0.0131962	31240	5	0.0743938	eqtl-a-ENSG00000070501	rs13164856	C	T	0.283115	POLB	TRUE	reported	igd	0.00101630270917464	31.779561683833
32587213	1.16931e-09	0.0122234	27594	6	0.0743711	eqtl-a-ENSG00000070501	rs28383314	C	T	0.616346	POLB	TRUE	reported	igd	0.00133976140034403	37.0162895542213
50370254	5.51569e-34	0.016595	30077	7	0.201684	eqtl-a-ENSG00000070501	rs149007767	T	C	0.149708	POLB	TRUE	reported	igd	0.00488681998545874	147.692859480089
28724374	7.37564e-11	0.0131077	31355	7	0.0853701	eqtl-a-ENSG00000070501	rs56388170	T	G	0.289189	POLB	TRUE	reported	igd	0.0013510289277154	42.4161153695264
42157902	3.74369e-99	0.0174343	31300	8	0.368481	eqtl-a-ENSG00000070501	rs2272733	C	T	0.870181	POLB	TRUE	reported	igd	0.0140709204386623	446.676821912173
111865049	3.12104e-14	0.0119128	28418	12	-0.0904537	eqtl-a-ENSG00000070501	rs7310615	G	C	0.537476	POLB	TRUE	reported	igd	0.00202465613212589	57.6493487579651
74609930	1e-200	0.0115885	29862	17	0.482417	eqtl-a-ENSG00000070526	rs12951792	A	G	0.377245	ST6GALNAC1	TRUE	reported	igd	0.0548495192573086	1732.85278735325
74670533	3.5752e-34	0.0236826	31351	17	-0.288661	eqtl-a-ENSG00000070526	rs2898621	C	T	0.933012	ST6GALNAC1	TRUE	reported	igd	0.00471642467881074	148.555849731895
74956874	2.71438e-09	0.0120388	26518	17	-0.0716054	eqtl-a-ENSG00000070526	rs9897325	G	T	0.421273	ST6GALNAC1	TRUE	reported	igd	0.00133231029561294	35.3746698352981
144385777	6.7655e-15	0.0266006	20660	6	0.207187	eqtl-a-ENSG00000070540	rs149110519	T	C	0.0526158	WIPI1	TRUE	reported	igd	0.00292777998736742	60.6596771678885
66373803	7.94694e-45	0.0119549	26609	17	0.167941	eqtl-a-ENSG00000070540	rs9913897	G	A	0.42542	WIPI1	TRUE	reported	igd	0.00736179983833162	197.328098260361
66081073	2.05636e-12	0.0293356	21981	17	0.20625	eqtl-a-ENSG00000070540	rs142077014	C	T	0.0428552	WIPI1	TRUE	reported	igd	0.00224375262208937	49.4263393594402
66279787	2.64728e-16	0.0427899	22504	17	-0.350377	eqtl-a-ENSG00000070540	rs145756130	T	C	0.019641	WIPI1	TRUE	reported	igd	0.00297055025331885	67.0424748408023
66427519	1e-200	0.0120148	25942	17	0.511385	eqtl-a-ENSG00000070540	rs12453629	T	C	0.319655	WIPI1	TRUE	reported	igd	0.065274494430585	1811.46269727379
35289935	4.11263e-09	0.0467309	26987	9	-0.274754	eqtl-a-ENSG00000070610	rs147272897	T	C	0.0164522	GBA2	TRUE	reported	igd	0.00127929058443674	34.5658762210178
36149031	6.42096e-14	0.0132244	31684	9	0.0991724	eqtl-a-ENSG00000070610	rs7874594	G	T	0.280337	GBA2	TRUE	reported	igd	0.00177181965216245	56.2344274835543
35933176	3.7853e-44	0.0260447	29524	9	0.362983	eqtl-a-ENSG00000070610	rs78395341	C	T	0.0544808	GBA2	TRUE	reported	igd	0.0065359812641258	194.224687800013
35904658	2.08689e-11	0.0361328	20136	9	-0.242083	eqtl-a-ENSG00000070610	rs148816410	A	G	0.0278202	GBA2	TRUE	reported	igd	0.00222425763367264	44.8830346287604
35680564	1e-200	0.0132135	31684	9	0.445322	eqtl-a-ENSG00000070610	rs3750433	A	G	0.250554	GBA2	TRUE	reported	igd	0.0346079809631817	1135.75628475721
149898499	1.44046e-85	0.0498334	10329	5	-0.976915	eqtl-a-ENSG00000070614	rs150949995	T	C	0.0140845	NDST1	TRUE	reported	igd	0.0358714700735265	384.227475850713
149846995	1e-200	0.0284758	30364	5	-0.904014	eqtl-a-ENSG00000070614	rs112222266	T	G	0.0425877	NDST1	TRUE	reported	igd	0.0321261167181206	1007.78951952721
149857588	4.08507e-16	0.0246373	24471	5	0.200449	eqtl-a-ENSG00000070614	rs111752138	G	T	0.06192	NDST1	TRUE	reported	igd	0.00269771868413392	66.1890378862634
149878228	1.47571e-174	0.0381198	26713	5	-1.07373	eqtl-a-ENSG00000070614	rs80147358	A	T	0.023639	NDST1	TRUE	reported	igd	0.0288439867624028	793.334664985539
50370254	7.2527e-16	0.0166433	30077	7	-0.134246	eqtl-a-ENSG00000070614	rs149007767	T	C	0.149708	NDST1	TRUE	reported	igd	0.00215849414263581	65.0571367884667
16170764	8.95509e-10	0.0118954	31569	17	0.0728845	eqtl-a-ENSG00000070614	rs7210990	A	C	0.481977	NDST1	TRUE	reported	igd	0.00118777800717371	37.5391765607788
38156712	1.17409e-12	0.012239	31185	17	-0.0869996	eqtl-a-ENSG00000070614	rs4794822	T	C	0.380161	NDST1	TRUE	reported	igd	0.00161768431093995	50.5259849612069
97707731	8.55658e-49	0.0121764	31684	7	-0.17876	eqtl-a-ENSG00000070669	rs4729402	T	C	0.378857	ASNS	TRUE	reported	igd	0.00675645093962867	215.513988358463
97300237	1.85396e-76	0.015406	31684	7	0.285101	eqtl-a-ENSG00000070669	rs72615149	A	G	0.177064	ASNS	TRUE	reported	igd	0.0106932242138597	342.445
97362335	1e-200	0.015002	31569	7	-0.493299	eqtl-a-ENSG00000070669	rs2072099	T	G	0.177814	ASNS	TRUE	reported	igd	0.0331158394551207	1081.17160952423
97571568	1e-200	0.0232952	27310	7	-0.788779	eqtl-a-ENSG00000070669	rs61198277	G	A	0.0645379	ASNS	TRUE	reported	igd	0.0402898971746013	1146.42589340771
32663631	2.4555e-08	0.0138362	31137	6	-0.0771563	eqtl-a-ENSG00000070718	rs3129720	C	T	0.755679	AP3M2	TRUE	reported	igd	0.000997697414061981	31.0943
90926612	4.07315e-10	0.0122608	31300	6	-0.0766424	eqtl-a-ENSG00000070718	rs10806425	A	C	0.377483	AP3M2	TRUE	reported	igd	0.00124685054553497	39.0726461242889
28178262	4.71857e-08	0.0139494	31684	7	-0.0761863	eqtl-a-ENSG00000070718	rs4722762	T	G	0.23858	AP3M2	TRUE	reported	igd	0.000940576286632977	29.8273928515142
41685166	9.00928e-09	0.0130237	31684	8	0.0748639	eqtl-a-ENSG00000070718	rs2111807	T	G	0.704066	AP3M2	TRUE	reported	igd	0.00104179781092086	33.040659932784
41998778	1e-200	0.0115072	31556	8	-0.417673	eqtl-a-ENSG00000070718	rs7823824	A	T	0.427042	AP3M2	TRUE	reported	igd	0.040076355681257	1317.36449523946
160677375	3.85478e-12	0.0130961	31569	2	0.0909156	eqtl-a-ENSG00000070731	rs12052715	G	C	0.710147	ST6GALNAC2	TRUE	reported	igd	0.00152429676988759	48.1909334191904
50370254	2.34693e-17	0.0166393	30077	7	0.141022	eqtl-a-ENSG00000070731	rs149007767	T	C	0.149708	ST6GALNAC2	TRUE	reported	igd	0.00238250147237121	71.8248546034096
61650831	1.99388e-13	0.015518	31569	8	0.114045	eqtl-a-ENSG00000070731	rs7846314	T	A	0.178349	ST6GALNAC2	TRUE	reported	igd	0.0017079603601251	54.0074272329351
74562570	1e-200	0.0128183	31355	17	-0.44651	eqtl-a-ENSG00000070731	rs3785442	T	C	0.273116	ST6GALNAC2	TRUE	reported	igd	0.0372567686602602	1213.31568977079
74206412	3.76184e-16	0.0121074	29992	17	0.0986255	eqtl-a-ENSG00000070731	rs9900975	C	T	0.597363	ST6GALNAC2	TRUE	reported	igd	0.00220755452194066	66.3510336373419
74593616	1e-200	0.0256898	28588	17	-1.21752	eqtl-a-ENSG00000070731	rs7217431	G	A	0.0486752	ST6GALNAC2	TRUE	reported	igd	0.0728449355083949	2245.95152007804
45797505	1e-200	0.0137923	31566	1	0.431367	eqtl-a-ENSG00000070759	rs3219489	G	C	0.224586	TESK2	TRUE	reported	igd	0.0300570990618067	978.121777961569
45987126	5.39846e-09	0.0432696	13233	1	-0.252448	eqtl-a-ENSG00000070759	rs35645395	A	G	0.0192449	TESK2	TRUE	reported	igd	0.00256568951092445	34.0339584893528
46620886	7.2845e-13	0.0120947	31555	1	0.086765	eqtl-a-ENSG00000070759	rs1112471	A	C	0.593391	TESK2	TRUE	reported	igd	0.00162825731249887	51.4601934175116
50370254	1.14183e-11	0.0166545	30077	7	0.113042	eqtl-a-ENSG00000070759	rs149007767	T	C	0.149708	TESK2	TRUE	reported	igd	0.00152938645405787	46.0667514714734
22735745	7.11541e-11	0.0453833	20976	1	0.295822	eqtl-a-ENSG00000070831	rs78665342	A	G	0.0174517	CDC42	TRUE	reported	igd	0.00202147008022965	42.4841939897697
22311970	1e-200	0.0118144	31456	1	-0.357888	eqtl-a-ENSG00000070831	rs71638813	T	C	0.608203	CDC42	TRUE	reported	igd	0.0283451943380313	917.57868896766
22346870	1.38931e-91	0.0121453	18585	1	-0.246502	eqtl-a-ENSG00000070831	rs2501294	C	G	0.37091	CDC42	TRUE	reported	igd	0.0216840778301284	411.886599395761
22487036	2.61216e-95	0.0119667	31684	1	0.24787	eqtl-a-ENSG00000070831	rs2744721	C	T	0.599647	CDC42	TRUE	reported	igd	0.0133603454687021	429.014243645518
25070204	1e-200	0.0117875	31139	7	-0.393713	eqtl-a-ENSG00000070882	rs6962912	C	A	0.38283	OSBPL3	TRUE	reported	igd	0.0345878984667364	1115.54785034116
25077628	2.23409e-16	0.0258679	27343	7	-0.212342	eqtl-a-ENSG00000070882	rs76856634	C	T	0.0558002	OSBPL3	TRUE	reported	igd	0.00245829704225396	67.3779344091367
25193360	5.15229e-14	0.0384625	28320	7	0.289545	eqtl-a-ENSG00000070882	rs62451621	C	T	0.0244469	OSBPL3	TRUE	reported	igd	0.00199708101653556	56.6665078333214
24812250	4.00405e-15	0.0137331	31470	7	-0.10787	eqtl-a-ENSG00000070882	rs34155688	T	G	0.249013	OSBPL3	TRUE	reported	igd	0.00195666667171143	61.6930996573895
135837906	1.1958e-09	0.0119711	8269	2	-0.0727917	eqtl-a-ENSG00000070915	rs7570971	A	C	0.441154	SLC12A3	TRUE	reported	igd	0.00445148632259115	36.9649865609519
56987765	6.11364e-17	0.0128882	13925	16	-0.107784	eqtl-a-ENSG00000070915	rs56228609	T	C	0.305591	SLC12A3	TRUE	reported	igd	0.00499750257728868	69.9297022508178
56874197	2.92691e-10	0.0121236	14262	16	-0.0764091	eqtl-a-ENSG00000070915	rs1865830	A	G	0.401653	SLC12A3	TRUE	reported	igd	0.00277740140022612	39.7160513839497
85794297	3.16242e-08	0.0120426	31684	2	-0.0666196	eqtl-a-ENSG00000071189	rs10187424	C	T	0.420816	SNX13	TRUE	reported	igd	0.000964948732564174	30.6010341742398
17885468	1.79763e-25	0.0178057	31684	7	0.185726	eqtl-a-ENSG00000071189	rs2691614	C	T	0.127006	SNX13	TRUE	reported	igd	0.00342214600320209	108.792734294291
17906180	2.29472e-10	0.045019	27844	7	-0.285429	eqtl-a-ENSG00000071189	rs117912312	G	A	0.0177434	SNX13	TRUE	reported	igd	0.00144160522008988	40.1951180297162
148983139	2.88005e-71	0.0121379	31684	4	0.216666	eqtl-a-ENSG00000071205	rs13109093	C	A	0.378049	ARHGAP10	TRUE	reported	igd	0.00995654528252158	318.615578071636
148514808	5.73865e-09	0.0130477	31569	4	0.0759939	eqtl-a-ENSG00000071205	rs6855339	G	T	0.294029	ARHGAP10	TRUE	reported	igd	0.00107340173497416	33.9204828730963
58963530	1.78649e-30	0.0137615	30415	19	0.157899	eqtl-a-ENSG00000071205	rs11671005	A	G	0.24568	ARHGAP10	TRUE	reported	igd	0.00430986427787573	131.643266896454
57838583	3.26167e-10	0.0147706	31684	4	0.0928468	eqtl-a-ENSG00000071242	rs17087335	T	G	0.203202	RPS6KA2	TRUE	reported	igd	0.00124553614373247	39.5102875969835
166667524	1.99894e-15	0.0127291	31478	6	0.101088	eqtl-a-ENSG00000071242	rs4709108	T	G	0.320134	RPS6KA2	TRUE	reported	igd	0.00199952771226308	63.0632309491003
166751839	9.87188e-57	0.0134477	31684	6	0.213441	eqtl-a-ENSG00000071242	rs4709112	G	A	0.7399	RPS6KA2	TRUE	reported	igd	0.00788824265440119	251.90237080285
167506274	4.14859e-59	0.0241606	31355	6	0.391694	eqtl-a-ENSG00000071242	rs73039162	G	A	0.0636225	RPS6KA2	TRUE	reported	igd	0.00831278060650908	262.815336588969
167359558	1e-200	0.0124563	31355	6	0.387969	eqtl-a-ENSG00000071242	rs2769343	T	C	0.309266	RPS6KA2	TRUE	reported	igd	0.0300106963263498	970.036843041948
167021501	3.11172e-11	0.0201378	27822	6	0.133741	eqtl-a-ENSG00000071242	rs9366033	C	A	0.0963644	RPS6KA2	TRUE	reported	igd	0.00158281001360808	44.1035821700716
77294241	4.66659e-11	0.0131942	31569	14	0.0868339	eqtl-a-ENSG00000071246	rs8006563	C	T	0.282875	VASH1	TRUE	reported	igd	0.0013701124822172	43.3096798591263
76955863	1.72783e-16	0.0173998	29951	14	0.143367	eqtl-a-ENSG00000071246	rs7160216	C	T	0.134547	VASH1	TRUE	reported	igd	0.00226159712716531	67.8861033778476
76965962	1.32954e-28	0.0142377	28797	14	0.157967	eqtl-a-ENSG00000071246	rs4293299	G	T	0.222937	VASH1	TRUE	reported	igd	0.00425650645362282	123.090036868376
77443155	2.62918e-10	0.0118874	31684	14	0.0751176	eqtl-a-ENSG00000071246	rs12435580	C	A	0.49457	VASH1	TRUE	reported	igd	0.00125870123573682	39.9284305154449
77318102	7.51277e-47	0.0256105	28998	14	-0.368131	eqtl-a-ENSG00000071246	rs138298426	A	G	0.0564101	VASH1	TRUE	reported	igd	0.00707484831037258	206.603993522049
77058533	1e-200	0.0122131	30280	14	-0.620509	eqtl-a-ENSG00000071246	rs4903434	A	G	0.721881	VASH1	TRUE	reported	igd	0.0785523429449355	2581.16434664137
77156706	1e-200	0.0142196	31681	14	1.31737	eqtl-a-ENSG00000071246	rs11629010	A	G	0.124427	VASH1	TRUE	reported	igd	0.213168734131735	8582.49108988742
12646409	1.4171e-45	0.0163297	26609	2	0.231382	eqtl-a-ENSG00000071575	rs7594033	A	G	0.155004	TRIB2	TRUE	reported	igd	0.007488754808611	200.756717022677
12745420	1.56387e-49	0.0118764	26609	2	0.175719	eqtl-a-ENSG00000071575	rs939221	G	A	0.448119	TRIB2	TRUE	reported	igd	0.00815982706652389	218.894661341332
12858078	8.22243e-196	0.0144381	26080	2	0.431009	eqtl-a-ENSG00000071575	rs77773048	A	G	0.199732	TRIB2	TRUE	reported	igd	0.0330409909326319	891.085302956358
16442019	6.25475e-09	0.0126581	22704	19	-0.0735386	eqtl-a-ENSG00000071575	rs55908509	A	G	0.3284	TRIB2	TRUE	reported	igd	0.00148438362256409	33.748572828241
57748369	1.36333e-19	0.012296	24140	20	-0.111342	eqtl-a-ENSG00000071575	rs259981	A	T	0.369389	TRIB2	TRUE	reported	igd	0.00338516940527594	81.9887649632807
145917008	2.27772e-11	0.0440006	9549	8	-0.294228	eqtl-a-ENSG00000071894	rs150600530	T	C	0.0185842	CPSF1	TRUE	reported	igd	0.00466083792004077	44.7054
145660833	2.8655e-86	0.011768	13925	8	0.231659	eqtl-a-ENSG00000071894	rs1010427	A	G	0.53234	CPSF1	TRUE	reported	igd	0.0270755294620434	387.463372662003
145836523	7.46621e-13	0.0412361	10845	8	-0.295687	eqtl-a-ENSG00000071894	rs117136674	C	T	0.0212063	CPSF1	TRUE	reported	igd	0.0047187347622603	51.4078208987152
145571993	1e-200	0.0112864	13925	8	-0.449418	eqtl-a-ENSG00000071894	rs35535975	A	G	0.499977	CPSF1	TRUE	reported	igd	0.102226106046686	1585.35916902261
145030443	5.06641e-14	0.0315147	10840	8	-0.237306	eqtl-a-ENSG00000071894	rs10098685	A	G	0.0368844	CPSF1	TRUE	reported	igd	0.00520350585141345	56.6905862147073
172567568	2.6872e-12	0.0224703	31026	2	-0.157139	eqtl-a-ENSG00000071967	rs12612105	T	C	0.0756354	CYBRD1	TRUE	reported	igd	0.00157376696167388	48.9015057931639
43721508	1.14314e-19	0.0120033	31086	2	0.108921	eqtl-a-ENSG00000071967	rs12478601	T	C	0.574604	CYBRD1	TRUE	reported	igd	0.00264185037267555	82.3367984860119
172117094	1e-200	0.0227109	31470	2	0.746049	eqtl-a-ENSG00000071967	rs11684292	T	G	0.0684919	CYBRD1	TRUE	reported	igd	0.0331533094425559	1079.04216017624
171928034	4.56667e-33	0.016254	31020	2	-0.194708	eqtl-a-ENSG00000071967	rs79908875	C	T	0.157556	CYBRD1	TRUE	reported	igd	0.0046046950639106	143.489155297502
171841182	1.18195e-11	0.0317595	30271	2	-0.215403	eqtl-a-ENSG00000071967	rs72878665	C	A	0.0363243	CYBRD1	TRUE	reported	igd	0.00151729476982492	45.9967860707645
172342452	1e-200	0.0113562	31341	2	0.466912	eqtl-a-ENSG00000071967	rs56851249	T	A	0.431439	CYBRD1	TRUE	reported	igd	0.0511771718373075	1690.3486516182
108962642	2.6687e-11	0.0161704	31470	6	0.107756	eqtl-a-ENSG00000071967	rs9480866	T	C	0.160953	CYBRD1	TRUE	reported	igd	0.00140906903730016	44.4031515717997
40974023	4.25971e-10	0.0292308	29063	13	-0.182523	eqtl-a-ENSG00000071967	rs77526211	A	G	0.0432109	CYBRD1	TRUE	reported	igd	0.00133977264376585	38.9873670082494
23589349	1.70369e-09	0.011897	31355	14	0.0716626	eqtl-a-ENSG00000071967	rs2239630	G	A	0.519173	CYBRD1	TRUE	reported	igd	0.0011558490599812	36.2812712508609
31088347	4.18408e-10	0.0123349	31470	16	-0.0770563	eqtl-a-ENSG00000071967	rs749671	A	G	0.366493	CYBRD1	TRUE	reported	igd	0.00123854009387673	39.0227108660924
170668039	2.94917e-31	0.0420703	28353	6	-0.48921	eqtl-a-ENSG00000071994	rs118070594	T	C	0.0202337	PDCD2	TRUE	reported	igd	0.00474650700924355	135.209995409997
170816718	1e-200	0.0114473	31569	6	0.38805	eqtl-a-ENSG00000071994	rs9460025	T	C	0.494565	PDCD2	TRUE	reported	igd	0.0351221238369948	1149.05742016942
171016449	1.90388e-09	0.0128652	1575	6	-0.0772643	eqtl-a-ENSG00000071994	rs4554352	C	A	0.691111	PDCD2	TRUE	reported	igd	0.0223877647513191	36.0224153136411
56849749	7.95976e-48	0.0121598	31644	3	0.176667	eqtl-a-ENSG00000072042	rs1354034	C	T	0.618137	RDH11	TRUE	reported	igd	0.00662642416929175	211.071965941303
243268	8.56052e-11	0.0142991	31529	11	0.0928084	eqtl-a-ENSG00000072042	rs505404	G	T	0.222031	RDH11	TRUE	reported	igd	0.00133434177709563	42.1240010208746
68205235	2.6333e-22	0.0119696	31523	14	0.116271	eqtl-a-ENSG00000072042	rs11158688	A	G	0.566313	RDH11	TRUE	reported	igd	0.00298440630928473	94.3530591399615
56849749	1.28706e-44	0.012166	31470	3	0.170487	eqtl-a-ENSG00000072110	rs1354034	C	T	0.618137	ACTN1	TRUE	reported	igd	0.00620138305519772	196.362843189387
50370254	1.32041e-10	0.0166573	29863	7	0.10702	eqtl-a-ENSG00000072110	rs149007767	T	C	0.149708	ACTN1	TRUE	reported	igd	0.00138034407067218	41.2754285874571
69466699	1.00716e-39	0.012052	31355	14	0.158963	eqtl-a-ENSG00000072110	rs1275193	A	C	0.404639	ACTN1	TRUE	reported	igd	0.00551777610554984	173.958699392163
69355447	1.26707e-18	0.0135091	31351	14	0.118996	eqtl-a-ENSG00000072110	rs1475033	G	C	0.261344	ACTN1	TRUE	reported	igd	0.00246880609200558	77.5861473314701
50370254	4.97519e-09	0.0166614	30077	7	-0.0974344	eqtl-a-ENSG00000072121	rs149007767	T	C	0.149708	ZFYVE26	TRUE	reported	igd	0.00113572611677248	34.1958000251047
68214788	2.48142e-38	0.0120426	31684	14	-0.1559	eqtl-a-ENSG00000072121	rs12879105	C	T	0.407212	ZFYVE26	TRUE	reported	igd	0.00526163323407178	167.580812896391
68280848	4.14381e-14	0.0125179	31684	14	0.0945901	eqtl-a-ENSG00000072121	rs181563	C	A	0.342365	ZFYVE26	TRUE	reported	igd	0.00179889764828721	57.0953840451222
128386644	1e-200	0.0117039	14254	2	-0.356556	eqtl-a-ENSG00000072163	rs2244880	C	G	0.414234	LIMS2	TRUE	reported	igd	0.0611311371807869	927.968752190198
129010984	4.3843e-09	0.0124656	13925	2	0.0731593	eqtl-a-ENSG00000072163	rs6723445	G	A	0.650308	LIMS2	TRUE	reported	igd	0.00246742857626355	34.4389838000832
128310380	1.19015e-19	0.0248566	13753	2	-0.225447	eqtl-a-ENSG00000072163	rs6743697	G	C	0.0606836	LIMS2	TRUE	reported	igd	0.00594590613900011	82.2512
195901976	1e-200	0.0143087	25827	3	-0.453586	eqtl-a-ENSG00000072274	rs9875719	G	T	0.20254	TFRC	TRUE	reported	igd	0.0374513646126012	1004.81311339781
195604421	9.13272e-16	0.015695	25942	3	-0.126155	eqtl-a-ENSG00000072274	rs75070205	C	T	0.173117	TFRC	TRUE	reported	igd	0.00248429167619704	64.603018822469
195818769	1.32465e-32	0.0201306	26409	3	0.239368	eqtl-a-ENSG00000072274	rs12493933	T	A	0.095706	TFRC	TRUE	reported	igd	0.00532534610109859	141.37930823962
195949022	7.39095e-13	0.0183097	26150	3	-0.131314	eqtl-a-ENSG00000072274	rs78843541	C	T	0.119579	TFRC	TRUE	reported	igd	0.00196306430064134	51.4311680230562
17866190	3.64334e-13	0.0452631	15769	17	-0.328976	eqtl-a-ENSG00000072310	rs77735858	A	G	0.0175332	SREBF1	TRUE	reported	igd	0.00333874510377908	52.8183410287843
17975300	5.68068e-34	0.0309022	26376	17	-0.375487	eqtl-a-ENSG00000072310	rs75200848	C	T	0.0381672	SREBF1	TRUE	reported	igd	0.00556644406935964	147.631176572576
17661802	1e-200	0.011995	31684	17	0.368065	eqtl-a-ENSG00000072310	rs4925109	G	A	0.638543	SREBF1	TRUE	reported	igd	0.0288596159934851	941.501732358668
127009395	3.19213e-09	0.015831	14263	9	-0.0937399	eqtl-a-ENSG00000072401	rs55793580	T	C	0.169838	UBE2D1	TRUE	reported	igd	0.00245219560009588	35.0567274056652
60100089	1e-200	0.0120607	14263	10	-0.443039	eqtl-a-ENSG00000072401	rs4948291	T	C	0.333496	UBE2D1	TRUE	reported	igd	0.0864309674255645	1349.20513120123
60206306	2.93089e-104	0.0194613	12835	10	-0.421991	eqtl-a-ENSG00000072401	rs2128908	T	A	0.899357	UBE2D1	TRUE	reported	igd	0.0353380011096949	470.105144353554
60293094	4.65908e-63	0.0196532	14255	10	-0.329415	eqtl-a-ENSG00000072401	rs12571046	C	A	0.0999018	UBE2D1	TRUE	reported	igd	0.0193275562077587	280.904863160961
38149724	4.36034e-08	0.0119232	10432	17	-0.0652877	eqtl-a-ENSG00000072401	rs3785549	C	T	0.536781	UBE2D1	TRUE	reported	igd	0.00286591341284517	29.9773894986213
241510903	1.0501e-09	0.0186349	25378	2	-0.113699	eqtl-a-ENSG00000072422	rs78909033	A	G	0.114954	RHOBTB1	TRUE	reported	igd	0.00146475558384358	37.2241619947505
56849749	3.54405e-37	0.0121805	30932	3	0.155177	eqtl-a-ENSG00000072422	rs1354034	C	T	0.618137	RHOBTB1	TRUE	reported	igd	0.00521967731497754	162.291729812767
99192919	2.24595e-18	0.0139601	25409	9	-0.122067	eqtl-a-ENSG00000072422	rs10820606	C	A	0.236914	RHOBTB1	TRUE	reported	igd	0.00300004004289995	76.4513745549588
62712497	8.62979e-129	0.011669	30812	10	0.281736	eqtl-a-ENSG00000072422	rs7898582	G	T	0.513024	RHOBTB1	TRUE	reported	igd	0.0185676897702946	582.893507641789
62572123	3.94094e-15	0.039578	30487	10	-0.310948	eqtl-a-ENSG00000072422	rs12254448	C	T	0.0230469	RHOBTB1	TRUE	reported	igd	0.00202057392696218	61.7219098451977
54712308	2.49e-25	0.0120553	30932	12	0.125368	eqtl-a-ENSG00000072422	rs10876550	A	G	0.590064	RHOBTB1	TRUE	reported	igd	0.00348412374252751	108.140723016973
122216910	3.15159e-08	0.0190293	29279	12	0.105287	eqtl-a-ENSG00000072422	rs11553699	G	A	0.10963	RHOBTB1	TRUE	reported	igd	0.00104446476764999	30.6107668699951
19657632	1.13868e-11	0.0125911	30732	19	0.0854673	eqtl-a-ENSG00000072422	rs7245983	C	A	0.334811	RHOBTB1	TRUE	reported	igd	0.00149703225558671	46.0727736424267
1923271	1.19097e-12	0.0131378	30932	20	-0.093361	eqtl-a-ENSG00000072422	rs4814779	A	C	0.286694	RHOBTB1	TRUE	reported	igd	0.00162993110651221	50.4960742465939
31163914	1.58409e-08	0.0124789	30433	20	0.0705344	eqtl-a-ENSG00000072422	rs6119267	G	C	0.348221	RHOBTB1	TRUE	reported	igd	0.0010486942738212	31.946317366745
56849749	2.89288e-08	0.012237	31470	3	-0.0678909	eqtl-a-ENSG00000072518	rs1354034	C	T	0.618137	MARK2	TRUE	reported	igd	0.000977128993119814	30.7783695927844
63697383	2.06633e-17	0.0218347	25692	11	-0.185375	eqtl-a-ENSG00000072518	rs72916323	A	G	0.080385	MARK2	TRUE	reported	igd	0.00279764915425496	72.0732424185066
63552051	3.58831e-08	0.0311758	28408	11	-0.171779	eqtl-a-ENSG00000072518	rs117532104	C	T	0.0377967	MARK2	TRUE	reported	igd	0.00106757986938148	30.3580834484129
161703992	3.74973e-163	0.0287944	26393	1	0.783789	eqtl-a-ENSG00000072694	rs61801187	G	A	0.0423902	FCGR2B	TRUE	reported	igd	0.0273067127862287	740.882523416635
160740094	1.56639e-13	0.0474561	22354	1	0.350297	eqtl-a-ENSG00000072694	rs76883141	C	T	0.0159221	FCGR2B	TRUE	reported	igd	0.00243151091055861	54.4816044885447
160880144	4.60522e-10	0.0456488	15594	1	0.284488	eqtl-a-ENSG00000072694	rs114014204	T	C	0.0172502	FCGR2B	TRUE	reported	igd	0.00248445603221486	38.8341201182777
161040994	7.35766e-10	0.0500977	18102	1	0.308517	eqtl-a-ENSG00000072694	rs41270001	G	A	0.0142802	FCGR2B	TRUE	reported	igd	0.00209067796961881	37.9205509104848
161909963	5.34441e-75	0.0133033	26394	1	-0.24377	eqtl-a-ENSG00000072694	rs4657125	T	C	0.733439	FCGR2B	TRUE	reported	igd	0.0125616452631653	335.744444395028
161653115	1.86209e-09	0.0561574	9045	1	-0.337472	eqtl-a-ENSG00000072694	rs141350127	T	C	0.0113322	FCGR2B	TRUE	reported	igd	0.00397669638187706	36.1048433813572
161390516	1e-200	0.0159233	25728	1	0.52332	eqtl-a-ENSG00000072694	rs9427039	A	G	0.15327	FCGR2B	TRUE	reported	igd	0.0402904662017844	1080.02733848535
50370254	1.04911e-08	0.0166623	24903	7	0.0953533	eqtl-a-ENSG00000072694	rs149007767	T	C	0.149708	FCGR2B	TRUE	reported	igd	0.00131334593454756	32.7466347758217
3225684	1.41416e-23	0.0427192	21453	3	0.427509	eqtl-a-ENSG00000072756	rs1669311	A	G	0.980339	TRNT1	TRUE	reported	igd	0.0046465817391415	100.139129537005
3171022	1e-200	0.0139402	31561	3	0.652792	eqtl-a-ENSG00000072756	rs3762759	T	C	0.196311	TRNT1	TRUE	reported	igd	0.0649663018136637	2192.72473592586
3199635	6.00206e-76	0.0157211	30475	3	0.289932	eqtl-a-ENSG00000072756	rs1669338	C	A	0.831732	TRNT1	TRUE	reported	igd	0.0110372947956718	340.093193139186
7093466	1e-200	0.0120835	28503	17	-0.403104	eqtl-a-ENSG00000072778	rs13331	G	A	0.658507	ACADVL	TRUE	reported	igd	0.0375771697241155	1112.80289766195
7267981	2.28681e-09	0.028273	23025	17	-0.168954	eqtl-a-ENSG00000072778	rs142046629	T	C	0.046351	ACADVL	TRUE	reported	igd	0.00154853309163375	35.7071711047481
7217099	1.10869e-08	0.0354605	25114	17	-0.202586	eqtl-a-ENSG00000072778	rs78173576	G	T	0.0289436	ACADVL	TRUE	reported	igd	0.00129792384712819	32.6358224613262
46627603	7.51969e-21	0.0197812	31185	22	0.185276	eqtl-a-ENSG00000072778	rs4253772	T	C	0.0999617	ACADVL	TRUE	reported	igd	0.00280522248339624	87.7213305484731
56849749	8.32722e-12	0.0122301	31684	3	-0.0835661	eqtl-a-ENSG00000072786	rs1354034	C	T	0.618137	STK10	TRUE	reported	igd	0.00147136618545829	46.6845135022412
171536970	1.33783e-98	0.0179517	31684	5	-0.378339	eqtl-a-ENSG00000072786	rs3103583	T	C	0.121275	STK10	TRUE	reported	igd	0.0138249969722547	444.143841336698
171589913	1.14499e-46	0.0118177	31684	5	-0.169523	eqtl-a-ENSG00000072786	rs6870231	T	C	0.498177	STK10	TRUE	reported	igd	0.00645267646078456	205.761407420778
171491697	3.8539e-15	0.0275154	31349	5	-0.216255	eqtl-a-ENSG00000072786	rs3812020	A	G	0.0489838	STK10	TRUE	reported	igd	0.00196653674155391	61.7664933159933
7201753	1e-200	0.0187287	14263	17	-0.596535	eqtl-a-ENSG00000072818	rs17805277	T	G	0.105307	ACAP1	TRUE	reported	igd	0.0664054920874913	1014.36835224877
7519010	3.93459e-15	0.0499243	8715	17	-0.392245	eqtl-a-ENSG00000072818	rs188750247	T	G	0.0143565	ACAP1	TRUE	reported	igd	0.00703328415435711	61.715064421595
7176614	1.5203e-09	0.0431706	10454	17	0.26085	eqtl-a-ENSG00000072818	rs147340918	G	A	0.0193317	ACAP1	TRUE	reported	igd	0.00348023790377592	36.5024838983108
7203259	3.86812e-18	0.0420733	10075	17	-0.365306	eqtl-a-ENSG00000072818	rs77119333	G	A	0.0203178	ACAP1	TRUE	reported	igd	0.00742707528600391	75.3727282833896
7204212	7.74462e-14	0.0268296	14167	17	0.200543	eqtl-a-ENSG00000072818	rs150181061	T	G	0.0516884	ACAP1	TRUE	reported	igd	0.00392825206431313	55.8631349662456
113099461	1e-200	0.0114777	26493	3	-0.375565	eqtl-a-ENSG00000072858	rs10934228	G	C	0.492017	SIDT1	TRUE	reported	igd	0.0388439383435117	1070.60113514191
112912421	1.8508e-08	0.022529	26485	3	-0.126737	eqtl-a-ENSG00000072858	rs9880039	A	T	0.924693	SIDT1	TRUE	reported	igd	0.00119345052422125	31.6439156807089
113419741	1.42462e-19	0.0124261	26486	3	-0.11246	eqtl-a-ENSG00000072858	rs9823423	G	A	0.351978	SIDT1	TRUE	reported	igd	0.00308296866459139	81.9018429283588
144385777	4.2462e-18	0.026587	20660	6	-0.23056	eqtl-a-ENSG00000072864	rs149110519	T	C	0.0526158	NDE1	TRUE	reported	igd	0.00362677810930943	75.1946966619037
50370254	6.03115e-14	0.0166484	25002	7	0.12499	eqtl-a-ENSG00000072864	rs149007767	T	C	0.149708	NDE1	TRUE	reported	igd	0.00224932810914378	56.359974804152
15731277	4.02254e-69	0.013455	25857	16	0.236435	eqtl-a-ENSG00000072864	rs67212531	C	T	0.258093	NDE1	TRUE	reported	igd	0.0118010964848204	308.761068778441
15865734	1.72306e-15	0.0351994	25987	16	0.280184	eqtl-a-ENSG00000072864	rs138482163	T	C	0.0293224	NDE1	TRUE	reported	igd	0.00243221750145627	63.3552655610481
15081995	1.86294e-16	0.0406714	6357	16	-0.334746	eqtl-a-ENSG00000072864	rs71374758	A	G	0.021787	NDE1	TRUE	reported	igd	0.0105437940325231	67.7198350695743
15888130	1.32969e-08	0.0145656	26609	16	-0.0827629	eqtl-a-ENSG00000072864	rs9923303	G	A	0.211188	NDE1	TRUE	reported	igd	0.00121187954741024	32.2836029560835
85794297	1.22349e-13	0.0120322	31684	2	0.0892118	eqtl-a-ENSG00000072952	rs10187424	C	T	0.420816	IRAG1	TRUE	reported	igd	0.00173205485072923	54.970173135829
144385777	7.92319e-35	0.0265158	25735	6	0.326433	eqtl-a-ENSG00000072952	rs149110519	T	C	0.0526158	IRAG1	TRUE	reported	igd	0.00585469582001566	151.546144112941
50370254	3.69913e-25	0.0166185	30077	7	-0.172195	eqtl-a-ENSG00000072952	rs149007767	T	C	0.149708	IRAG1	TRUE	reported	igd	0.00355693071450022	107.356551052435
61650831	1.82949e-08	0.0155303	31569	8	-0.0873935	eqtl-a-ENSG00000072952	rs7846314	T	A	0.178349	IRAG1	TRUE	reported	igd	0.00100207986073547	31.6643852065548
10601828	2.48313e-126	0.0410269	31004	11	-0.9809	eqtl-a-ENSG00000072952	rs77541067	C	T	0.0206526	IRAG1	TRUE	reported	igd	0.0181033977077266	571.58924312876
10634502	1.46825e-25	0.0451484	20571	11	0.471791	eqtl-a-ENSG00000072952	rs117514142	C	A	0.0175529	IRAG1	TRUE	reported	igd	0.00528031563597721	109.187356019657
10465558	1.41677e-15	0.0259536	30470	11	0.207216	eqtl-a-ENSG00000072952	rs74909106	A	G	0.0554243	IRAG1	TRUE	reported	igd	0.00208771529494336	63.7415838859368
10490512	6.7936e-14	0.0439473	24092	11	0.329249	eqtl-a-ENSG00000072952	rs142385800	T	C	0.0186149	IRAG1	TRUE	reported	igd	0.00232434746886118	56.1239821607436
10521764	1e-200	0.0112993	31684	11	-0.528858	eqtl-a-ENSG00000072952	rs3741041	C	T	0.400879	IRAG1	TRUE	reported	igd	0.0646695927976508	2190.52221892741
10916643	7.41703e-09	0.0455192	6107	11	-0.263151	eqtl-a-ENSG00000072952	rs138757723	A	G	0.0173571	IRAG1	TRUE	reported	igd	0.00544280346060627	33.4101600618051
16170764	1.17652e-20	0.0118748	31569	17	0.11066	eqtl-a-ENSG00000072952	rs7210990	A	C	0.481977	IRAG1	TRUE	reported	igd	0.00274330981636906	86.8362797920927
42838550	3.57273e-11	0.0118941	31684	20	0.0787496	eqtl-a-ENSG00000072952	rs2143606	G	A	0.480514	IRAG1	TRUE	reported	igd	0.00138163423637698	43.8334977380706
43721508	2.20648e-22	0.0119981	31300	2	-0.116764	eqtl-a-ENSG00000072954	rs12478601	T	C	0.574604	TMEM38A	TRUE	reported	igd	0.00301673044882723	94.7033239884757
116599199	1.51461e-22	0.0121111	30792	8	-0.118327	eqtl-a-ENSG00000072954	rs2293889	G	T	0.600603	TMEM38A	TRUE	reported	igd	0.00309042633544437	95.4492056070375
16785907	4.67305e-11	0.0388892	29612	19	-0.255926	eqtl-a-ENSG00000072954	rs73006573	A	C	0.0239231	TMEM38A	TRUE	reported	igd	0.0014603883387964	43.3053413272434
144385777	4.99701e-10	0.0266213	25735	6	0.165568	eqtl-a-ENSG00000073008	rs149110519	T	C	0.0526158	PVR	TRUE	reported	igd	0.00150078279520001	38.6776904813143
50370254	7.63185e-10	0.0166593	30077	7	-0.102493	eqtl-a-ENSG00000073008	rs149007767	T	C	0.149708	PVR	TRUE	reported	igd	0.00125688110312046	37.8482699516359
61650831	3.07001e-10	0.0155259	31569	8	0.0977417	eqtl-a-ENSG00000073008	rs7846314	T	A	0.178349	PVR	TRUE	reported	igd	0.00125383534124128	39.629509096024
45122146	2.67239e-50	0.022504	31568	19	-0.335622	eqtl-a-ENSG00000073008	rs79572806	T	C	0.074397	PVR	TRUE	reported	igd	0.00699656841570885	222.409783879502
45070575	3.44905e-13	0.0160718	31234	19	0.116934	eqtl-a-ENSG00000073008	rs12971551	A	G	0.16329	PVR	TRUE	reported	igd	0.00169195783961259	52.9327872912103
125328779	1.90414e-43	0.0190085	26856	12	-0.262712	eqtl-a-ENSG00000073060	rs11057851	A	G	0.108502	SCARB1	TRUE	reported	igd	0.00706227799448869	190.999303441658
125321199	1e-200	0.0115313	31353	12	-0.370631	eqtl-a-ENSG00000073060	rs4765624	G	A	0.542069	SCARB1	TRUE	reported	igd	0.0318983912243762	1032.9974190831
125387851	1.31704e-17	0.0125115	31353	12	-0.106873	eqtl-a-ENSG00000073060	rs4304886	A	G	0.342292	SCARB1	TRUE	reported	igd	0.00232182034225871	72.9607913998123
85794297	1.2823e-09	0.0120399	31684	2	-0.0730764	eqtl-a-ENSG00000073150	rs10187424	C	T	0.420816	PANX2	TRUE	reported	igd	0.00116135197432116	36.8367336638111
43359061	3.03508e-08	0.013552	27399	2	-0.07507	eqtl-a-ENSG00000073150	rs12466022	A	C	0.260124	PANX2	TRUE	reported	igd	0.00111867833052533	30.6827543538189
50370254	2.10136e-11	0.0166552	30077	7	0.111573	eqtl-a-ENSG00000073150	rs149007767	T	C	0.149708	PANX2	TRUE	reported	igd	0.0014898292412767	44.8734682365331
50692115	5.82103e-23	0.0171135	27490	22	0.168848	eqtl-a-ENSG00000073150	rs2076138	C	T	0.139616	PANX2	TRUE	reported	igd	0.00352861483231117	97.3380329373401
50860573	1.48799e-12	0.0194389	30116	22	0.137544	eqtl-a-ENSG00000073150	rs12163227	C	T	0.104289	PANX2	TRUE	reported	igd	0.00165966814012245	50.0623332311313
50610628	1.1324e-199	0.0131921	29947	22	0.397716	eqtl-a-ENSG00000073150	rs6010198	A	G	0.742421	PANX2	TRUE	reported	igd	0.0294564207453604	908.843804723569
113063526	1e-200	0.0115733	31465	4	0.350215	eqtl-a-ENSG00000073331	rs1436136	G	A	0.459461	ALPK1	TRUE	reported	igd	0.0282793080958657	915.645697403759
113451374	1.07939e-09	0.0409994	24275	4	-0.249974	eqtl-a-ENSG00000073331	rs185491582	T	C	0.0214793	ALPK1	TRUE	reported	igd	0.00152901198246439	37.1705420545543
113262195	2.62241e-46	0.0157606	31385	4	-0.225177	eqtl-a-ENSG00000073331	rs28600749	T	C	0.169205	ALPK1	TRUE	reported	igd	0.00646196983393425	204.114984168711
111884608	5.57494e-10	0.0119296	28204	12	-0.0739861	eqtl-a-ENSG00000073331	rs3184504	C	T	0.542056	ALPK1	TRUE	reported	igd	0.00136190222844803	38.4607464229526
38163295	9.50605e-21	0.0122269	31355	17	0.114218	eqtl-a-ENSG00000073331	rs12600856	C	T	0.379553	ALPK1	TRUE	reported	igd	0.00277538072998036	87.2586881085742
38259443	2.43669e-14	0.038068	27004	17	-0.290268	eqtl-a-ENSG00000073584	rs117054360	T	C	0.0249669	SMARCE1	TRUE	reported	igd	0.00214840451598726	58.1361186405173
38724215	1e-200	0.0112161	30902	17	-0.630207	eqtl-a-ENSG00000073584	rs62066595	G	A	0.358985	SMARCE1	TRUE	reported	igd	0.0926936652275021	3156.85468706444
38834500	4.7863e-145	0.02757	25638	17	0.707045	eqtl-a-ENSG00000073584	rs75223106	T	C	0.0467101	SMARCE1	TRUE	reported	igd	0.0250112860924011	657.637694794446
37822311	1.70923e-14	0.0131161	31563	17	-0.100611	eqtl-a-ENSG00000073584	rs1053651	C	A	0.712002	SMARCE1	TRUE	reported	igd	0.00186077704359044	58.8374676819234
38884550	1.33199e-15	0.0443107	21719	17	-0.354114	eqtl-a-ENSG00000073584	rs185550275	C	T	0.0182949	SMARCE1	TRUE	reported	igd	0.00293193241281285	63.8600094406182
38624278	1.11173e-42	0.0238735	25731	17	-0.32691	eqtl-a-ENSG00000073584	rs11653877	A	G	0.0656468	SMARCE1	TRUE	reported	igd	0.00723459449782306	187.495334550194
38105334	1e-200	0.0133614	31240	17	0.792297	eqtl-a-ENSG00000073605	rs7217240	T	C	0.198089	GSDMB	TRUE	reported	igd	0.101167252023467	3515.96292616564
37226399	4.60999e-11	0.0152931	31684	17	-0.100673	eqtl-a-ENSG00000073605	rs12453656	G	A	0.185351	GSDMB	TRUE	reported	igd	0.00136584486872864	43.3318817594144
37303712	1.39123e-26	0.0182711	31565	17	-0.194968	eqtl-a-ENSG00000073605	rs571825	G	A	0.119555	GSDMB	TRUE	reported	igd	0.00359441026438942	113.859629395522
38297985	3.70937e-69	0.0314944	26240	17	-0.553568	eqtl-a-ENSG00000073605	rs75957101	G	T	0.0362627	GSDMB	TRUE	reported	igd	0.0116366528048786	308.917259184976
37396201	1e-200	0.0130651	28326	17	-0.522319	eqtl-a-ENSG00000073605	rs34473775	T	G	0.752161	GSDMB	TRUE	reported	igd	0.0534100297220449	1598.1425214161
609329	2.88802e-22	0.0229022	31529	12	-0.222247	eqtl-a-ENSG00000073614	rs56124146	G	A	0.0723183	KDM5A	TRUE	reported	igd	0.00297791290416043	94.1650755229869
357104	1e-200	0.0122591	31191	12	-0.389643	eqtl-a-ENSG00000073614	rs487252	C	G	0.326694	KDM5A	TRUE	reported	igd	0.0313721466253743	1010.15666407888
334342	3.21366e-28	0.0131528	31644	12	-0.144884	eqtl-a-ENSG00000073614	rs11835796	T	C	0.28325	KDM5A	TRUE	reported	igd	0.00381989049128864	121.33245160352
170066977	2.03517e-21	0.0145176	31565	2	0.137964	eqtl-a-ENSG00000073737	rs4668124	A	C	0.21191	DHRS9	TRUE	reported	igd	0.00285295757931824	90.3055379449561
169828995	1e-200	0.0115124	31684	2	-0.360602	eqtl-a-ENSG00000073737	rs3770586	T	C	0.490191	DHRS9	TRUE	reported	igd	0.0300358682585122	981.063471344731
169965624	1.03944e-85	0.0211264	31355	2	0.414506	eqtl-a-ENSG00000073737	rs10192264	T	C	0.0843798	DHRS9	TRUE	reported	igd	0.0121284228835322	384.931049213246
148200011	2.73653e-16	0.0120387	31569	5	0.0985287	eqtl-a-ENSG00000073737	rs56330463	C	T	0.582097	DHRS9	TRUE	reported	igd	0.00211731260970773	66.9790226799502
144385777	6.21584e-58	0.0264179	25735	6	-0.42387	eqtl-a-ENSG00000073737	rs149110519	T	C	0.0526158	DHRS9	TRUE	reported	igd	0.00990425463914774	257.415695222789
28277107	1.81539e-10	0.0122818	31569	7	0.078311	eqtl-a-ENSG00000073737	rs2158799	G	C	0.625845	DHRS9	TRUE	reported	igd	0.00128617994109008	40.6531294400189
50370254	8.04822e-25	0.0166194	30077	7	0.170969	eqtl-a-ENSG00000073737	rs149007767	T	C	0.149708	DHRS9	TRUE	reported	igd	0.00350626002765788	105.821809111151
61650831	5.93882e-23	0.0154944	31569	8	0.152844	eqtl-a-ENSG00000073737	rs7846314	T	A	0.178349	DHRS9	TRUE	reported	igd	0.00307290996097361	97.3015476329936
28780373	2.18132e-10	0.0143262	31569	10	0.0909426	eqtl-a-ENSG00000073737	rs2998286	C	T	0.779099	DHRS9	TRUE	reported	igd	0.00127484644097676	40.2944468344516
111865049	8.29278e-14	0.0119136	28418	12	-0.0889408	eqtl-a-ENSG00000073737	rs7310615	G	C	0.537476	DHRS9	TRUE	reported	igd	0.00195736409942527	55.7295412525938
40974023	6.11928e-30	0.0291381	29277	13	-0.331207	eqtl-a-ENSG00000073737	rs77526211	A	G	0.0432109	DHRS9	TRUE	reported	igd	0.00439377270550503	129.195350960388
186641058	2.71019e-188	0.0381208	30227	1	-1.11569	eqtl-a-ENSG00000073756	rs689470	A	G	0.0235354	PTGS2	TRUE	reported	igd	0.027557014866252	856.513736091079
186802791	2.5527e-14	0.0147238	31141	1	0.112183	eqtl-a-ENSG00000073756	rs35180943	A	G	0.204585	PTGS2	TRUE	reported	igd	0.00186068513362213	58.047883209185
186966849	2.208e-92	0.0118529	31470	1	0.241636	eqtl-a-ENSG00000073756	rs12037836	C	T	0.571235	PTGS2	TRUE	reported	igd	0.0130340523500691	415.572148490633
148200011	1.6323e-33	0.0120055	31355	5	-0.144838	eqtl-a-ENSG00000073756	rs56330463	C	T	0.582097	PTGS2	TRUE	reported	igd	0.00462047296093363	145.538143802376
[truncated: 24,153 more rows]

## Sheet: S3
ID	Description	GeneRatio	BgRatio	pvalue	p.adjust	qvalue	geneID	Count
hsa00220	Arginine biosynthesis	1/5	23/8846	0.0129357	0.102612	0.0762444	ARG1	1
hsa00330	Arginine and proline metabolism	1/5	50/8846	0.0279499	0.102612	0.0762444	ARG1	1
hsa00600	Sphingolipid metabolism	1/5	54/8846	0.0301586	0.102612	0.0762444	ASAH1	1
hsa01230	Biosynthesis of amino acids	1/5	75/8846	0.0416885	0.102612	0.0762444	ARG1	1
hsa05235	PD-L1 expression and PD-1 checkpoint pathway in cancer	1/5	90/8846	0.0498569	0.102612	0.0762444	RASGRP1	1
hsa05146	Amoebiasis	1/5	103/8846	0.0568909	0.102612	0.0762444	ARG1	1
hsa04931	Insulin resistance	1/5	109/8846	0.0601233	0.102612	0.0762444	TBC1D4	1
hsa04071	Sphingolipid signaling pathway	1/5	122/8846	0.0670965	0.102612	0.0762444	ASAH1	1
hsa04660	T cell receptor signaling pathway	1/5	122/8846	0.0670965	0.102612	0.0762444	RASGRP1	1
hsa04919	Thyroid hormone signaling pathway	1/5	122/8846	0.0670965	0.102612	0.0762444	TBC1D4	1
hsa04611	Platelet activation	1/5	126/8846	0.0692337	0.102612	0.0762444	RASGRP1	1
hsa04142	Lysosome	1/5	132/8846	0.0724322	0.102612	0.0762444	ASAH1	1
hsa04148	Efferocytosis	1/5	157/8846	0.0856648	0.112023	0.0832371	ARG1	1
hsa04141	Protein processing in endoplasmic reticulum	1/5	170/8846	0.0924858	0.112304	0.0834459	PDIA6	1
hsa05415	Diabetic cardiomyopathy	1/5	205/8846	0.110648	0.125401	0.0931772	TBC1D4	1
hsa04014	Ras signaling pathway	1/5	238/8846	0.127505	0.135474	0.100662	RASGRP1	1
hsa04010	MAPK signaling pathway	1/5	300/8846	0.158484	0.158484	0.117759	RASGRP1	1
